24 **Abstract**

25 The ability to learn new skills and to store them as memory entities is one of the most  
26 impressive features of higher evolved organisms. However, not all memories are created  
27 equal; some are short-lived forms, and some are longer lasting. Formation of the latter is  
28 energetically costly and by the reason of restricted availability of food or fluctuations in  
29 energy expanses, efficient metabolic homeostasis modulating different needs like survival,  
30 growth, reproduction, or investment in longer lasting memories is crucial. Whilst equipped  
31 with cellular and molecular pre-requisites for formation of a protein synthesis dependent long-  
32 term memory (LTM), its existence in the larval stage of *Drosophila* remains elusive.  
33 Considering it from the viewpoint that larval brain structures are completely rebuilt during  
34 metamorphosis, and that this process depends completely on accumulated energy stores  
35 formed during the larval stage, investing in LTM represents an unnecessary expenditure.  
36 However, as an alternative, *Drosophila* larvae are equipped with the capacity to form a  
37 protein synthesis independent so-called larval anaesthesia resistant memory (IARM), which is  
38 consolidated in terms of being insensitive to cold-shock treatments. Motivated by the fact  
39 that LTM formation causes an increase in energy uptake in *Drosophila* adults, we tested the  
40 idea of whether an energy surplus can induce the formation of LTM in the larval stage.  
41 Indeed, increasing the metabolic state by feeding *Drosophila* larvae the disaccharide sucrose  
42 directly before aversive olfactory conditioning led to the formation of a larval LTM (ILTM).  
43 Moreover, we show that the metabolic state acts as a binary switch between the formation of  
44 IARM and ILTM. Based on this finding, we determined that it is the insulin receptor (InR)  
45 expressed in the mushroom body Kenyon cells (MB KCs) that mediates this switch to favor  
46 the formation of ILTM under energy-rich circumstances and IARM under energy-poor  
47 circumstances.

48 **Introduction**

49 Harboring the ability to deal with novelties and unpredictable complexities provides the key  
50 to successfully adapt to unforeseen events in an ever-changing environment. Therefore, one of  
51 the most outstanding capabilities of higher evolved organisms is the capacity to constantly  
52 learn new tasks, integrate new skills and preserve them as memory entities. However,  
53 establishing a memory is a highly complex and dynamic process. Apart from the involvement  
54 of multilayered neuronal circuitries and cellular machineries [1], the capacity to form  
55 memories comes with energetic costs since activation and maintenance of synaptic  
56 connections involved in integrating, storing and retrieving information are energy demanding  
57 [2,3]. These circumstances can either lead to trade-offs with other phenotypic traits or to  
58 learning and memory impairments, when available energy resources are restricted [4,5]. For  
59 example, trade-offs between learning abilities in longevity and competitive abilities in  
60 *Drosophila* [6–8], reduced foraging skills in bumble bees [9], delayed juvenile development  
61 in mites [10], and decreased fecundity in guppies [11] and butterflies [12] have been  
62 described. Moreover, honeybees experience significant costs for learning and show a memory  
63 deficit being energetically stressed [13]. On the other hand, formation of LTM led to reduced  
64 resistance to food and water stress in *Drosophila* [14] and during food deprivation the  
65 formation of energetically costly LTM is disabled [15].

66

67 A general feature of memory formation across species is the parallel and chronologically  
68 ordered occurrence of distinct short-, intermediate-, and/or long-lasting memory phases [1]. In  
69 adult *Drosophila*, four temporally distinct memory phases have been characterized [16].  
70 Thereby, LTM and ARM represent longer lasting memories that are resistant to anesthetic  
71 disruption but are mutually exclusive and distinguished by their dependence on *de novo*

72 protein synthesis; LTM requires protein synthesis whereas ARM does not [17,18]. In adult  
73 *Drosophila* the formation of LTM, by protein synthesis dependency [17], causes an increase  
74 in energy uptake [19]. Under conditions of reduced food availability, the brain disables the  
75 formation of costly LTM and favors the formation of ARM [15]. One hypothesis proposes  
76 that “neuronal gating mechanisms” prevent adult *Drosophila* from forming energetically  
77 costly LTM under critical nutritional circumstances [19,20].

78

79 The larval stage of *Drosophila* has emerged as a favorable model system for studying learning  
80 and memory [21] because of the relative simplicity of the brain, for which the complete  
81 synaptic connectome is known [22,23]. Olfactory memory during the larval stage of  
82 *Drosophila* also consists of different memory phases [23]. For example, after classical  
83 aversive Pavlovian conditioning, during which larvae associate an odor with an aversive high  
84 salt stimulus [24,25], at least two co-existing memory phases have been distinguished: a labile  
85 larval short-term memory (lSTM) and lARM that are encoded by separate molecular  
86 pathways [24]. Although, *Drosophila* larvae possess cellular and molecular pre-requisites of  
87 potentially forming a protein synthesis dependent long-term memory (LTM) [23], the  
88 existence of a protein synthesis dependent LTM remains still elusive. Memorizing behavioral  
89 adjustments based on previous experience depends on the balancing of costs and benefits:  
90 only relevant information should be stored into energetically costly, protein synthesis  
91 dependent longer lasting memories, whereas less reliable information should be disregarded.  
92 Accordingly, the formation of LTM in larvae would represent an unnecessary expenditure,  
93 since larval brain structures are completely rebuilt during metamorphosis – meaning any  
94 plastic changes that occur due to learning might be lost in the re-wiring of the brain.  
95 Therefore, the aim of this study was to attempt to override this state-dependent limitation on

96 LTM formation by feeding sugar prior to classical aversive conditioning. Indeed, we were  
97 able to show that by elevating the energetic state of larvae before conditioning, larvae are able  
98 to successfully form aversive ILTM. Conversely, we show that such a protocol inhibits the  
99 formation of IARM. We were additionally able to demonstrate that the process of ILTM  
100 formation depends on the activity of the *rutabaga* (*rut*) adenylate cyclase (AC), and that  
101 insulin receptors (IRs) expressed in the mushroom body Kenyon cells (MB KCs) gate the  
102 state-dependent switch between IARM and ILTM.

103 **Results**

104 **Sucrose consumption specifically suppresses IARM**

105 We first asked whether an increase in nutritional energy through carbohydrate uptake over a  
106 short period of time affects IARM. To tackle this question, we tested the memory  
107 performance of third instar, wild-type larvae trained using a previously described three-cycle  
108 aversive olfactory conditioning protocol [24], which was here additionally preceded by  
109 sucrose feeding for 60 min— to elevate the energetic state—and followed by an anesthetizing  
110 cold shock treatment (4°C) for 1 min [24]—to isolate IARM (Fig 1A and 1B). The memory  
111 tested 40 min after training onset (10 min after training offset) in larvae that consumed  
112 sucrose was indistinguishable from that of control larvae that consumed only tap water (Fig  
113 1C, S3 Table). This memory was completely abolished after cold shock treatment (Fig 1C, S1  
114 Table). Therefore, we concluded that IARM is not detectable after sucrose consumption  
115 anymore. It is unlikely that this memory phase is a residual ISTM, because it is well-  
116 established that ISTM is only detectable for up to 30 minutes after training onset using this  
117 aversive conditioning procedure [24]. Taking these findings into account, we hypothesize that  
118 sucrose consumption suppresses the expression of IARM.

119

120 Sugar consumption is regulated depending on the satiation state of the animal. In *Drosophila*  
121 larvae, hemolymph carbohydrate levels negatively correlate with sucrose consumption [26].  
122 To ensure that this point of high sugar consumption was actually reached in our experiments,  
123 we examined the time at which sucrose consumption reached saturation by using a dye-  
124 feeding assay [27] (S1A Fig and S1B Fig). During the first 15 and 30 min, a steady increase  
125 in sucrose consumption was observed (S1A Fig and S1B Fig, S1 Table). By contrast, larvae  
126 feeding for 60 min showed sucrose ingestion behavior that was similar to that of larvae

127 feeding on a dye-only solution (S1A Fig and S1B Fig, S1 Table), indicating that sucrose  
128 consumption had reached saturation within 60 min. Next, we confirmed that task-relevant  
129 sensory-motor abilities like naïve odor preference and salt avoidance were not altered after  
130 sucrose consumption (S1C Fig, S1 Table and S2 Table). Strikingly, the suppression of IARM  
131 after caloric intake was specific for sucrose and was an immediate effect, as neither the  
132 consumption of yeast for 60 min nor of high-caloric food for 1 day led to a suppression of  
133 IARM (S2A Fig and S2B Fig, S1 Table and S3 Table). This suggests the involvement of a  
134 fast-acting, specific sugar-detecting mechanism, rather than a general mechanism that  
135 monitors overall caloric food intake.

136

137 **Sucrose consumption gates a cAMP-dependent memory and inactivates *radish*-**  
138 **dependent IARM**

139 The *radish* (*rsh*) gene [28] plays a pivotal role in the formation of IARM [24]. Using this  
140 mutant provides a tool to test whether the memory phase affected by sucrose consumption is  
141 equivalent to the molecularly defined IARM. In line with the key role of *rsh* in IARM  
142 formation [24], *rsh*<sup>1</sup> mutant larvae that fed on tap water for 60 min showed complete  
143 abolishment of an aversive olfactory memory tested directly after training, in contrast to wild-  
144 type animals (Fig 2A; S1 Table). However, the aversive olfactory memory of *rsh*<sup>1</sup> mutant  
145 larvae that consumed sucrose for 60 min prior to training revealed no significant defect in  
146 comparison with wild-type larvae that consumed either tap water or sucrose (Fig 2A; S3  
147 Table). This finding suggests that the memory deficit in this ARM-specific memory mutant  
148 can be rescued by sucrose consumption. This further supports our hypothesis that IARM is  
149 replaced by an additional memory phase, if the energy state of the animal is sufficient. Next,  
150 we analyzed whether this rescue of memory in *rsh*<sup>1</sup> mutants is due to the direct action of

151 sucrose in *rsh*-associated molecular pathways, or if there is an additional, *rsh*-independent  
152 mechanism at play. Again, we fed *rsh*<sup>1</sup> mutant larvae sucrose for 60 min, followed by  
153 conditioning and tested, if the formed aversive olfactory memory in these mutant larvae was  
154 sensitive to anesthesia induced by cold shock treatment (Fig 2B). No memory was detectable,  
155 indicating that the aversive olfactory memory formed in *rsh*<sup>1</sup> mutants after sucrose  
156 consumption was sensitive to cold shock treatment (Fig 2B, S1 Table).

157

158 Apparently, sugar consumption induces a memory phase that differs from IARM at the  
159 molecular level. Interestingly, previously reported genetic dissections of larval memory  
160 revealed that aversive ISTM and IARM utilize different molecular pathways [24,29,30], in  
161 which ISTM depends on proper cAMP-induced signaling. Therefore, we tested whether the  
162 formation of the cold shock-sensitive memory after sucrose consumption depends on cAMP  
163 signaling. We fed the classical learning mutant *rutabaga*<sup>2080</sup> (*rut*<sup>2080</sup>), which exhibits the  
164 inability to appropriately increase intracellular cAMP level [31], sucrose for 60 min followed  
165 by conditioning (Fig 2C). Directly after training, *rut*<sup>2080</sup> larvae fed on tap water showed intact  
166 aversive olfactory memory (Fig 2C, S1 Table and S3 Table), in line with the finding that *rsh*-  
167 dependent IARM, but not cAMP-dependent ISTM, is prevalent at this time point [4].  
168 However, aversive olfactory memory after sucrose consumption in *rut*<sup>2080</sup> mutants was  
169 completely abolished (Fig 2C, S1 Table). These findings indicate that the newly formed  
170 aversive olfactory memory, induced through sucrose consumption, replaces *rsh*-dependent  
171 IARM with a *rut*-dependent memory. Therefore, sugar consumption triggers a switch between  
172 molecular pathways determining memory phases.

173



174 **Activity of the insulin receptor is necessary for suppression of IARM after sucrose**  
175 **consumption**

176 In *Drosophila*, the insulin-like growth factor signaling (IIS) pathway is not only essential for  
177 maintaining energy storage and glucose metabolism, but also for regulating lifespan and  
178 aging, reproduction, nutrient sensing, and cellular growth [32]. In contrast to mammals, which  
179 have a large family of IIS-receptors, *Drosophila* has only one insulin receptor (DInR), but  
180 eight insulin-like peptides [33,34]. It has been shown that the DInR is necessary for the  
181 formation of aversive olfactory LTM in adult *Drosophila* and for the formation of  
182 intermediate-term memory in aged flies [35,36]. DInR is strongly expressed in the larval  
183 central nervous system (CNS), as well as that of adults [37]. Furthermore, mapping the  
184 developmental expression atlas of genes in MB neurons revealed an expression of the DInR in  
185 the MB of *Drosophila* third instar larvae [38]. This is important because the synapses that  
186 change in the course of associative olfactory learning and thereby mediate memory formation  
187 could be localized to the MB KCs, both in adult and larval *Drosophila* [23,39]. Thus, we  
188 tested whether the suppression of IARM after sucrose consumption depends on proper insulin  
189 signaling in the MB of larval *Drosophila*. We expressed a dominant negative variant of the  
190 DInR (UAS-*InR*<sup>DN</sup>) in all KCs using the driver line OK107. We fed OK107/UAS-*InR*<sup>DN</sup> and  
191 both control groups (OK107/+ and UAS-*InR*<sup>DN</sup>/+) sucrose for 60 min followed by  
192 conditioning and cold shock treatment (Fig 3A). Both control groups receiving cold shock  
193 treatment showed a complete abolishment of aversive olfactory memory after sucrose  
194 consumption (Fig 3A, S1 Table). By contrast, larvae expressing *InR*<sup>DN</sup> in KCs (OK107/UAS-  
195 *InR*<sup>DN</sup>) showed an intact aversive olfactory memory comparable to that of the three genetic  
196 groups (OK107/+, UAS-*InR*<sup>DN</sup>/+ and OK107/UAS-*InR*<sup>DN</sup>) that did not receive any cold shock  
197 after conditioning (Fig 3A, S1 Table and S3 Table). All task-relevant sensory-motor abilities

198 were unaltered after sucrose consumption (S3A Fig – S3D Fig, S1 Table and S3 Table);  
199 however, larvae expressing *InR<sup>DN</sup>* in KCs (OK107/*UAS-InR<sup>DN</sup>*) showed a slight reduction in  
200 sucrose consumption (S3E Fig – S3G Fig, S1 Table). This is in line with the observation that  
201 inhibition of insulin signaling in the neurons of the MB reduces food intake [40]. Overall, we  
202 conclude that intact insulin signaling is necessary for the suppression of IARM and for the  
203 observed switch in memory phases after sucrose consumption. But which memory phase,  
204 exactly, is induced through sucrose consumption?

### 205 **Rapid consolidation of ILTM after the consumption of sucrose**

206 We have shown, that after sucrose consumption IARM is suppressed and a second, cAMP  
207 dependent memory component is formed (Fig 1B and 2C). But which memory phase, exactly,  
208 is induced through sucrose consumption? It has been shown in *Drosophila* adults that STM  
209 but also LTM rely on proper cAMP signaling [41]. So far, a protein synthesis-dependent LTM  
210 has not yet been shown in larvae, although evidence of a longer form of memory dependent  
211 on the transcription factor CREB strongly points towards its existence [24]. Therefore, we  
212 questioned whether feeding on sucrose induces the formation of ILTM thereby switching  
213 IARM to ILTM. First, we determined whether the memory was stable over a longer period of  
214 time. We fed wild-type larvae sucrose for 60 min prior to conditioning and tested the memory  
215 60 min after training (S4A Fig). The observed olfactory memory was found to be more stable  
216 than LSTM, based on the fact that it was still detectable after 60 min and was as robust as  
217 IARM formed without sucrose feeding (S4A Fig, S1 Table and S2 Table). Therefore, the  
218 newly formed memory was long-lasting on a larval time scale. Next, we tested whether the  
219 memory formed after sucrose consumption was dependent on *de-novo* protein synthesis by  
220 feeding larvae with the translation-inhibitor cycloheximide (CXM) for 16 hours before the  
221 sucrose feeding [17,24] (Fig 4A). Wild-type larvae treated with CXM and fed sucrose showed

222 a statistically significant decrease in olfactory aversive memory tested at 30 min and 60 min  
223 after conditioning when compared to control groups, with the effect being stronger at 60 min  
224 (Fig 4B, S1 Table and S3 Table). However, the memory was not completely abolished (Fig  
225 4B, S1 Table and S3 Table). These findings indicate that sucrose consumption leads to the  
226 suppression of lARM and, instead, promotes a rapid consolidation of larval LTM (ILTM).

227

228 Typically, aversive olfactory LTM is induced by multiple training trials that are separated by  
229 temporal spaces [17]. In larvae, five spaced cycles of training leads to CREB-dependent  
230 ILTM [24]. We tested whether the sugar-induced formation of ILTM shown here matched the  
231 time course of spaced training-induced ILTM. After three spaced training trials, no ILTM was  
232 observed (S4B Fig, S1 Table and S2 Table). This result was in contrast to sugar-promoted  
233 ILTM formation, shown here to be inducible even after only three training trials. Therefore,  
234 we postulate that sugar gates ILTM formation more rapidly and efficiently than increasing the  
235 number of spaced training cycles. However, it has been shown that blocking protein synthesis  
236 using CXM has a deleterious effect over a longer period of time; specifically, larvae do not  
237 properly pupate or enclose [24]. Therefore, we tested whether sucrose consumption after  
238 CXM treatment was impaired by feeding larvae CXM for 16 hours. Larvae consumed a  
239 detectable amount of liquid dye ( $0.091 \pm 0.025 \mu\text{l/larva/h}$ , one-sample t-test,  $p=0.002$ ) (S2  
240 Data) and the consumption of sucrose was not altered after CXM treatment (S4C Fig, S1  
241 Table). Therefore, the effect of CXM on memory formation cannot be attributed to impaired  
242 sucrose consumption.

243

244 **Discussion**

245 Establishing a memory requires the timely controlled action of different neuronal circuits,  
246 neurotransmitters, neuromodulators and molecules. It is known that after classical aversive  
247 olfactory conditioning, *Drosophila* adults form two mutually exclusive longer lasting memory  
248 types - LTM and ARM - which can be distinguished based on their dependency on *de-novo*  
249 protein synthesis [17,18,42]. The occurrence of such genetically and functionally distinct  
250 memory phases is conserved in the animal kingdom, shown in honeybees, in *Aplysia*, and also  
251 in vertebrates [43–46].

252

253 The hypothesis that protein synthesis-dependent LTM formation is energetically costly and,  
254 therefore, restricted to favorable nutritional conditions, is based on a study of adult  
255 *Drosophila* [15]. Furthermore, after a spaced training protocol known to induce LTM  
256 formation [17,47], flies increased their sugar consumption [19]. Therefore, it seems that the  
257 formation of LTM is closely related to energy metabolism, such that the cost of this process  
258 must be compensated with increased sugar consumption. Larval *Drosophila* undergoes  
259 metamorphosis and the accumulated energy storage during this stage contributes to somatic  
260 maintenance and reproduction in adults [48]. Therefore, these larvae present a model system  
261 in which the energetic cost of LTM formation far exceeds the potential benefit, especially  
262 considering that this memory faces potential degradation during metamorphosis.

263

264 Seen in this light, and along with fact that larvae possess all the necessary cellular machinery,  
265 we hypothesized that short-term feeding on sucrose directly before training could result in a  
266 surplus of energy such that LTM formation is induced instead of ARM. Indeed, we show here  
267 that feeding larvae sugar before conditioning is also sufficient to trigger this switch, even with

268 a less intensive training protocol. This implies that LTM formation is based on two gating  
269 mechanisms: one responding to the training intensity (e.g., temporal spacing of multiple  
270 trials) and one to the metabolic state. Regarding the first, two slow oscillating dopaminergic  
271 neurons have been proposed to act as a gating mechanism for LTM formation at the cost of  
272 inhibiting protein synthesis-independent ARM [20]. Regarding the latter, we propose a  
273 mechanism in the brain of larval *Drosophila* that directly senses the metabolic state at the  
274 time of training and is furthermore independent of the training regime (**Fig 5**). Without  
275 feeding on sucrose or by knocking down the InR in the MB KCs, two co-existing memory  
276 phases are visible after aversive olfactory conditioning (ISTM and IARM, Fig 5A). However,  
277 by elevating the energetic state by feeding sucrose and through an insulin-signaling-  
278 dependent gating mechanism, the *rsh*-dependent IARM is suppressed and a cAMP-dependent  
279 ILTM is visible (Fig 5B). This supports the finding that *Drosophila* larvae can form a CREB-  
280 dependent memory [24]. Therefore, we have determined that the conserved principal of  
281 cAMP-dependent, protein synthesis-dependent LTM formation holds true also for *Drosophila*  
282 larvae, although they undergo metamorphosis and most likely all formed ILTM is erased after  
283 the re-structuring of brain connectivity in the course of pupation.

284

285 Remarkably, we have also demonstrated a novel gating mechanism underlying the formation  
286 of LTM. Previous work has shown that LTM in adult *Drosophila* leads to a subsequent  
287 increase in energy metabolism. We take this a step further by demonstrating that increasing  
288 the energetic state of larvae before the training begins is sufficient to trigger the formation of  
289 LTM even after a less intense training protocol. This means that, although LTM is highly  
290 costly (and in the case of larvae theoretically redundant), its formation can be forced under the  
291 right circumstances due to the presence of a mechanism for the detection of energetic surplus

292 that negates this high cost. This is also in agreement with recent studies showing that  
293 glycolytic enzymes are required in the MB of adult *Drosophila* for the formation of aversive  
294 olfactory memory [49]. This means that the brain of larval *Drosophila*—and potentially  
295 brains of other animals as well [50]—is not only a calculation device to decide if incoming  
296 sensory information is of importance, for example in the case of repetitions of the same  
297 stimulus, but can also sense and balance existing resources and decide if forming an  
298 expensive memory is an affordable or life-threatening luxury, especially for larvae whose  
299 main behavioral activity is taking in food.

300

301 Sugar by itself is assumed to be a primary source of energy, with circulating sugar levels  
302 reflecting the energetic state of an animal. Controlling the metabolic homeostasis is regulated  
303 via the *Drosophila* orthologs of glucagon (adipokinetic hormone, AKH) and insulin  
304 (*Drosophila* insulin-like peptide, DILP) [51]. Both have been proven to be involved in  
305 feeding and foraging behaviors and are controlled contrastingly through glucose [52–54].  
306 Additionally, it has been shown that the InR is acutely required for LTM formation in  
307 *Drosophila* adults [36]. Strikingly, we show here that both increase in energetic state and the  
308 InR are necessary to mediate the formation of ILTM in *Drosophila* larvae (Fig 5B). We  
309 concluded that the InR in the MB KCs of *Drosophila* larvae can directly sense the elevated  
310 energetic state provoked by feeding sucrose directly before training and as a result mediate  
311 the state-dependent switch between IARM and ILTM. Beyond that, the involvement of insulin  
312 signaling in memory formation has striking parallels in mammals as well. For example,  
313 downregulation of an insulin receptor in the hippocampus of mice leads to spatial learning  
314 deficits [55]. Moreover, injections of insulin reversed memory deficits caused by Alzheimer’s  
315 disease, and in stroke patients an intranasal insulin treatment has been shown to improve

316 hippocampal-dependent declarative memory in healthy humans [56]. Given the fact that the  
317 molecular underpinnings of both memory formation and insulin signaling are highly  
318 conserved across the animal kingdom [57,58], this correspondence among taxa is not  
319 surprising. Rather, it corroborates the general validity of model organisms like *Drosophila*.  
320 Thus, our finding that insulin signaling gates the formation of LTM and inhibits an alternative  
321 memory component could be of importance for the study in higher organisms, including  
322 humans.  
323

324 **Acknowledgment**

325 We are grateful to André Fiala and Andreas S. Thum for support. We thank Lyubov  
326 Pankevych, Margarete Ehrenfried and Jutta Böker for fly care and maintenance. Furthermore,  
327 we thank Claudius Neumann and Clare Hancock for proofreading the manuscript. We would  
328 like to thank Bertram Gerber, Thomas Preat, André Fiala and Andreas S. Thum for helpful  
329 comments on the manuscript and discussions. This work was supported by the University of  
330 Göttingen and the Zukunftscolleg of the University of Konstanz.

331

332 **Authors Contributions**

333 Conceptualization: A.W. Data curation: A.W. Formal analysis: N.G., M.E., K.-E.H., H.R.F.,  
334 L.H., A.W. Experimental work: N.G., M.E., K.-E.H., H.R.F., L.H., A.W. Project  
335 administration and supervision: A.W. Writing: A.W.

336

337 **Declaration of Interests**

338 The authors declare no competing conflict of interest.



339 **Material and methods**

340 **Fly stocks**

341 Fly strains were reared on standard *Drosophila* medium at 25°C with 70% humidity in a 12-  
342 hour light-dark cycle. Crosses were raised at 18°C or 25°C with 70% relative humidity in a  
343 12-hour light-dark cycle on standard *Drosophila* medium. Flies were transferred to new vials  
344 and allowed to lay eggs for 2 days. For all experiments, 6-day-old foraging (feeding) third  
345 instar larvae were used. The wild-type strain was *Canton-S* (denoted here as wild-type). We  
346 used the learning mutants *rut*<sup>2080</sup> (obtained from the Bloomington Drosophila Stock Center,  
347 BDSC No.: 9405) and *rsh*<sup>1</sup> (kindly provided by T. Preat) [28,31]. All lines were outcrossed  
348 over several generations with wild-type *Canton-S* that was used as a genetic control. To  
349 express Gal4 in all larval Kenyon cells (KCs) we used the driver line OK107 [59,60]  
350 (obtained from the Bloomington Drosophila Stock Center, BDSC no.: 106098). The effector  
351 line UAS-*dInR*<sup>A1409K</sup> (denoted here as UAS-*dInR*<sup>DN</sup>) (obtained from the Bloomington  
352 Drosophila Stock Center, BDSC No.: 8253) was used to reduce insulin signaling within the  
353 KCs. The UAS-*dInR*<sup>DN</sup> transgene carries an amino acid replacement in the kinase domain  
354 (K1409A) of the *Drosophila* insulin receptor (dInR), which results in its dominant negative  
355 activity [61].

356

357 **Aversive olfactory learning and memory**

358 Aversive olfactory learning and memory was performed at 23°C under standard laboratory  
359 conditions. Standard aversive olfactory conditioning experiments were performed using an  
360 odor-high salt conditioning paradigm, as previously described [24]. Experiments were  
361 conducted on assay plates (92-mm diameter, Sarstedt, Nümbrecht, cat. no.: 82.1472) filled  
362 with a thin layer of 2.5% agarose containing either pure agarose (Sigma Aldrich, cat. no.:

363 A5093, CAS no.: 9012-36-6) or agarose plus 1.5 M sodium chloride (Sigma Aldrich, cat. no.:  
364 S7653, CAS no.: 7647-14-5) [24,25]. As olfactory stimuli, we used 10  $\mu$ l amyl acetate (AM,  
365 Sigma Aldrich cat. no.: 109584; CAS No.: 628-63-7; diluted 1:250 in paraffin oil, Sigma  
366 Aldrich cat. no.: 18512, CAS no.: 8012-95-1) and benzaldehyde (BA, undiluted; Sigma  
367 Aldrich cat. no.: 418099, CAS no.: 100-52-7). Odorants were loaded into custom-made  
368 Teflon containers (4.5-mm diameter) with perforated lids [62]. Learning ability was tested by  
369 exposing a first group of 30 larvae to AM while they crawled on agarose medium that  
370 additionally contained sodium chloride as a negative reinforcer. After 5 min, the larvae were  
371 transferred to a fresh Petri dish in which they were allowed to crawl on a pure agarose  
372 medium for 5 min while being exposed to BA (AM+/BA). A second group of larvae received  
373 the reciprocal training (AM/BA+). Three training cycles were conducted. To test the memory  
374 after training, larvae were transferred onto another agarose plate and kept there for the  
375 indicated time before the memory was tested. To increase the humidity, tap water was added.  
376 Memory was tested by transferring larvae onto fresh agarose plates containing 1.5 M sodium  
377 chloride, on which AM and BA were presented on opposite sides. After 5 min, individuals  
378 located on the AM side (#AM), BA side (#BA), or in a 1-cm neutral zone were counted. We  
379 determined a preference index for each training group by subtracting the number of larvae on  
380 the BA side from the number of larvae on the AM side, and dividing by the total number of  
381 counted individuals (#TOTAL), as follows:

382

383 (1a)  $\text{PREF}_{\text{AM+/BA-}} = (\#AM - \#BA) / \#TOTAL$

384 (1b)  $\text{PREF}_{\text{AM/BA+}} = (\#AM - \#BA) / \#TOTAL$

385

386 To specifically measure the effect of associative learning that is of the odor-reinforcement  
387 contingency, we then calculated the associative Performance Index (PI) as the difference in  
388 preference between the reciprocally trained larvae, as follows:

389

$$390 \quad (2) \quad PI = (PREF_{AM+/BA} - PREF_{AM/BA+}) / 2$$

391

392 Negative PIs represented aversive associative learning, whereas positive PIs indicated  
393 appetitive associative learning. Division by 2 ensured that the scores were bounded between -  
394 1 and 1).

395

### 396 **Manipulation of the nutritional state**

397 The nutritional state of larvae was manipulated by feeding 0.15 M sucrose (Sigma Aldrich,  
398 cat. no.: 84097, CAS no.: 57-50-1) for 60 min. A group of 30 larvae were either fed with 0.15  
399 M sucrose mixed with tap water (+SUC) or with tap water (-SUC, control group). Larvae  
400 were placed in a Petri dish (35-mm diameter, Sarstedt, Nümbrecht, cat. no.: 82.1135.500)  
401 containing 2.5% agarose, and 1.5 ml of sucrose solution (+SUC) or tap water (-SUC) was  
402 added. This volume ensured that larvae did not crawl out of the sucrose solution and  
403 additionally prevented them from drowning. The larvae were allowed to feed for 60 min (if  
404 not stated otherwise) at 23°C. Zeitgeber time and humidity were kept constant for these  
405 experiments. The larvae were washed gently with tap water after being fed and transferred to  
406 an empty Petri dish containing 2.5% agarose.

407

## 408 **Quantification of sucrose consumption**

409 To quantify sucrose consumption we used a modified feeding assay, as previously described  
410 [27]. A group of 30 larvae were placed in a Petri dish (35-mm diameter, Sarstedt, Nümbrecht,  
411 cat. no.: 82.1135.500) containing 2.5% agarose and either 1.5 ml 0.15 M sucrose + 2% indigo  
412 carmine (w/vol) (Sigma Aldrich, cat. no.: 57000, CAS no.: 860-22-0) mixed in tap water  
413 (+SUC +IC, experimental group), 2% (w/ml) indigo carmine mixed in tap water (+IC, dye-  
414 only control) or tap water (-IC, blank control). Again, 1.5 ml of the specific solution ensured  
415 that larvae did not crawl out of the solution and additionally prevented them from drowning.  
416 The larvae were allowed to feed for 1 hour at 23°C. Zeitgeber time and humidity were kept  
417 constant for these experiments. After 60 min, larvae were rinsed with tap water, transferred  
418 into 2-ml Eppendorf cups containing 500 µl of 1 M L-ascorbic acid (Sigma Aldrich, cat. no.:  
419 A7506, CAS no.: 50-81-7) and bead-based homogenized for 2 min using a Qiagen  
420 TissueLyser LT at a frequency of 50/s. After centrifugation at 14,800 rpm for 5 min at 23°C,  
421 the supernatant (400 µl) was transferred to Micro Bio-Spin™ Columns (Bio-Rad) and  
422 centrifuged again at 14,800 rpm for 5 min at 23°C for filtration. Subsequently, 200 µl of the  
423 supernatant was transferred into a new Eppendorf cup (1.5 ml) and centrifuged for a third  
424 time at 14,000 rpm for 2 min at 23°C. To quantify sucrose consumption, 100 µl supernatant  
425 was transferred to a 96-well plate (Greiner Bio-One, cat. no.: 655061) and absorbance was  
426 measured at 610 nm [27] using a BioTek™ Epoch Spectrophotometer. The corrected  
427 absorbance ABS (CORR) of each measurement was calculated by subtracting the mean  
428 absorbance of 1 M ascorbic acid ( $ABS_{AA}$ ) from the relative absorbance of either the blank  
429 control ( $ABS_{-IC}$ ), dye-only control ( $ABS_{+IC}$ ), or experimental group ( $ABS_{+SUC +IC}$ ). The  
430 relative consumption of sucrose (R.C.) was deduced by calculating the difference between the  
431 corrected mean absorbance of the blank control ( $ABS_{-IC}(CORR)$ ), the corrected mean

432 absorbance of the dye-only control ( $ABS_{+IC}(CORR)$ ) and the relative absorbance of the  
433 experimental group ( $ABS_{-IC +SUC}(CORR)$ ):

434

$$435 \quad (3) \quad R.C. = (ABS_{+IC +SUC}(CORR) - ABS_{-IC}(CORR)) - (ABS_{+IC}(CORR) - ABS_{-IC}(CORR)) /$$
$$436 \quad (ABS_{+IC}(CORR) - ABS_{-IC}(CORR))s$$

437

438 The blank control and the dye-only control were measured at every experiment and for every  
439 genotype on the same day. An R.C. value of 0 indicated that the larvae in the experimental  
440 group ate as much as the dye-only control larvae, a  $R.C. \leq 0$  indicated that the larvae in the  
441 experimental group ate less than dye-only control larvae, and an  $R.C. \geq 0$  indicated that larvae  
442 in the experimental group ate more than larvae in the dye-only control. To verify that the  
443 amount of ingested dye is represented in a linearly proportional manner, absorbance at 610  
444 nm was measured for 100  $\mu$ l of ascorbic acid and 2% (w/ml) indigo carmine in a two-fold  
445 serial dilution (data not shown).

446

#### 447 **Cold shock treatment**

448 To distinguish between cold shock sensitive and cold shock resistant memory phases, odor-  
449 high salt conditioning was followed by a cold shock treatment, as previously described [24].  
450 Briefly, larvae were incubated in ice-cold tap water (4°C) for 1 min. Larvae were allowed to  
451 recover for at least 10 min by transferring them onto fresh agarose plates. They started  
452 moving within 2 min and were kept on the agarose plates at 23°C until testing.

453

454 **Cycloheximide treatment**

455 To test if aversive olfactory memory induced by feeding sucrose prior to training is dependent  
456 on *de novo* protein synthesis, larvae were fed cycloheximide (CXM) as previously described  
457 [24]. Briefly, larvae were fed either with 35 mM cycloheximide (+CXM; Sigma Aldrich cat.  
458 no.: C7698; CAS no.: 66-81-9) or tap water (-CXM, control group) for 16 hours before the  
459 experiment. Therefore, 300  $\mu$ l of CXM solution or tap water was added to the food vials.  
460 Before the experiment the larvae were gently washed with tap water and transferred to an  
461 empty Petri dish before being fed sucrose and undergoing subsequent odor-high salt  
462 conditioning and testing of the aversive olfactory memory at different time points.

463

464 **Odor preference and high salt avoidance experiments**

465 To analyze larval olfactory perception, 30 larvae were placed along the midline of a Petri dish  
466 containing 2.5% pure agarose, with either a 10  $\mu$ l amyl acetate- (AM) or a benzaldehyde-  
467 containing (BA) odor container on one side and an empty container (EC) on the other side.  
468 After 5 min, larvae located on the odor side (#ODOR), the side with the empty container  
469 (#EC), or in a 1-cm neutral zone were counted. By subtracting the number of larvae on the  
470 odor side from the number of larvae on the EC side, and dividing by the total number of  
471 counted individuals (#TOTAL), we determined a preference index for either AM or BA for  
472 each training group, as follows:

473

474 (4)  $\text{PREF} = (\text{\#ODOR} - \text{\#EMPTY}) / \text{\#TOTAL}$

475

476 To investigate high salt avoidance, 30 larvae were placed along the midline of a Petri dish  
477 containing pure agarose on one side and agarose plus 1.5 M sodium chloride on the other.

478 After 5 min larvae located on the salt side (#SALT), the agarose side (#AGAROSE), or in a  
479 1-cm neutral zone were counted. By subtracting the number of larvae on the odor side from  
480 the number of larvae on the EC side, and dividing by the total number of counted individuals  
481 (#TOTAL), we determined a preference index for high salt avoidance for each training group,  
482 as follows:

483

$$484 \quad (5) \quad \text{GAI} = (\#SALT - \#AGAROSE) / \#TOTAL$$

485

### 486 **Quantification and statistical analysis**

487 All statistical analyses and visualizations were conducted with *GraphPad Prism* 8.0.2.  
488 Significance level of all statistical test was set to  $\alpha=0.05$ . To compare single groups against  
489 the level of chance, we used Bonferroni-corrected two-tailed one-sample t-tests for normally  
490 distributed data (Shapiro-Wilk test), otherwise Bonferroni-corrected two-tailed Wilcoxon  
491 signed-rank tests; significance level equates to  $\alpha/n$  ( $\alpha=0.05$ ), in which n is the number of  
492 tests. Significance is indicated in all figures below the respective boxplot by: (ns) not  
493 significant; (\*)  $p < 0.05/n$ . For comparison between two groups, which did not violate the  
494 assumptions of normality (Shapiro-Wilk test) and homogeneity of variance (Bartlett's test)  
495 were analyzed with two-tailed unpaired t-test, otherwise two-tailed Mann-Whitney test.  
496 Significance is indicated in all figures above boxplots by: (ns) not significant; (\*)  $p < 0.05$ . For  
497 statistical tests involving two factors, two-way ANOVAs were applied, followed by planned,  
498 pairwise multiple comparisons (Bonferroni *post-hoc* pairwise comparisons); significance is  
499 indicated in all figures above boxplots by: lowercase letters indicate differences between  
500 groups ( $p < 0.05$ ) or (ns) not significant. Respective statistical tests used, sample sizes, and  
501 descriptive statistics can be found in Supplemental Table S1, S2 and S3 for main figures and

502 Supporting Information figures. Data were presented as Tukey box plots, with 50% of the  
503 values being located within the boxes and whiskers representing 1.5 interquartile range.  
504 Outliers were indicated as open circles. The median was indicated as a bold line and the  
505 mean as a cross within the box plot. Unless stated otherwise, experiments had a sample size of  
506 16. Figure alignments were performed with *Adobe Photoshop CC 2019* and *Adobe Illustrator*  
507 *CC 2019*.  
508



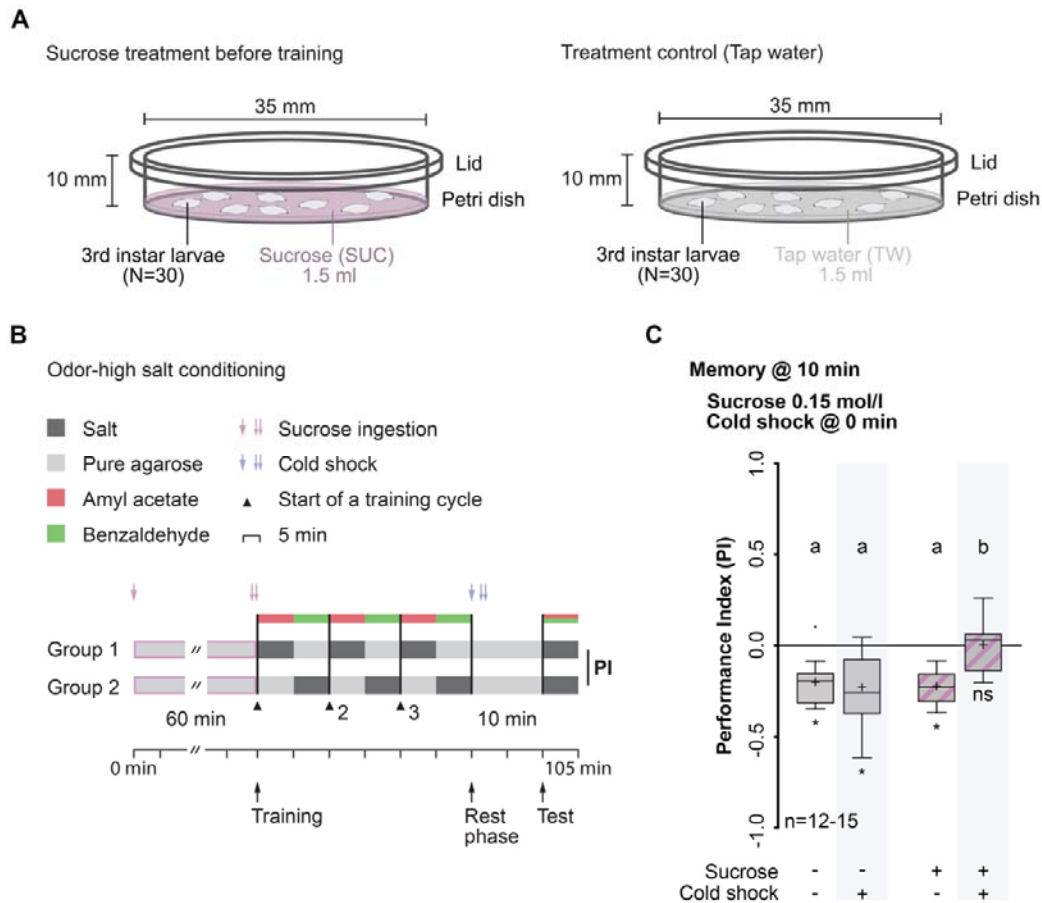

509

510 **Fig 1. Sucrose consumption specifically suppresses IARM.**

511 (A) Schematic illustration of the manipulation of the metabolic state via sucrose feeding.  
 512 Larvae were placed in a Petri dish filled with agarose containing either sucrose solution  
 513 (SUC) (left) or tap water (TW) (right) for 60 min. (B) Schematic illustration of experimental  
 514 principles and odor-high salt conditioning using a two-odor reciprocal training paradigm  
 515 (reciprocally trained group not shown throughout). After feeding on 0.15 M SUC for 60 min  
 516 (1 red arrow, start; 2 red arrows, end) two groups of 30 larvae were trained reciprocally with 3  
 517 training cycles without temporal gaps. Group 1 received the first odor AM paired with an  
 518 aversive reinforcer (high salt concentration) while the second odor BA was presented alone  
 519 (AM+/BA). Group 2 received the reverse contingency (AM/BA+). Subsequently, larvae

520 received a cold shock treatment for 1 min (1 blue arrow, start; 2 blue arrows, end). Memory  
521 was tested 10 min later by calculating a Performance Index (PI). (C) After sucrose  
522 consumption, wild-type larvae showed a complete memory loss upon cold shock treatment.  
523 Larvae that consumed sucrose but did not receive a cold shock treatment showed IARM,  
524 comparable to larvae that did not consume sucrose independently of cold shock treatment.  
525 Memory performance above the level of chance was tested using Bonferroni-corrected one-  
526 sample t-tests (ns  $p \geq 0.0125$ ; \*  $p < 0.0125$ ;  $\alpha = 0.0125$ ). Differences between the groups were  
527 determined using two-way ANOVA followed by Bonferroni *post-hoc* pairwise comparisons.  
528 Lowercase letters indicate differences between groups ( $p < 0.05$ ). For more statistical details  
529 see also Table S1 and S3. Data are shown as Tukey box plots; line, median; cross, mean; box,  
530 75th-25th percentiles; whiskers, 1.5 interquartile range; small circles, outlier ( $n \geq 8$ ). AM, n-  
531 amyl acetate; BA, benzaldehyde; IARM, larval anesthesia resistant memory; SUC, sucrose;  
532 TW, tap water.

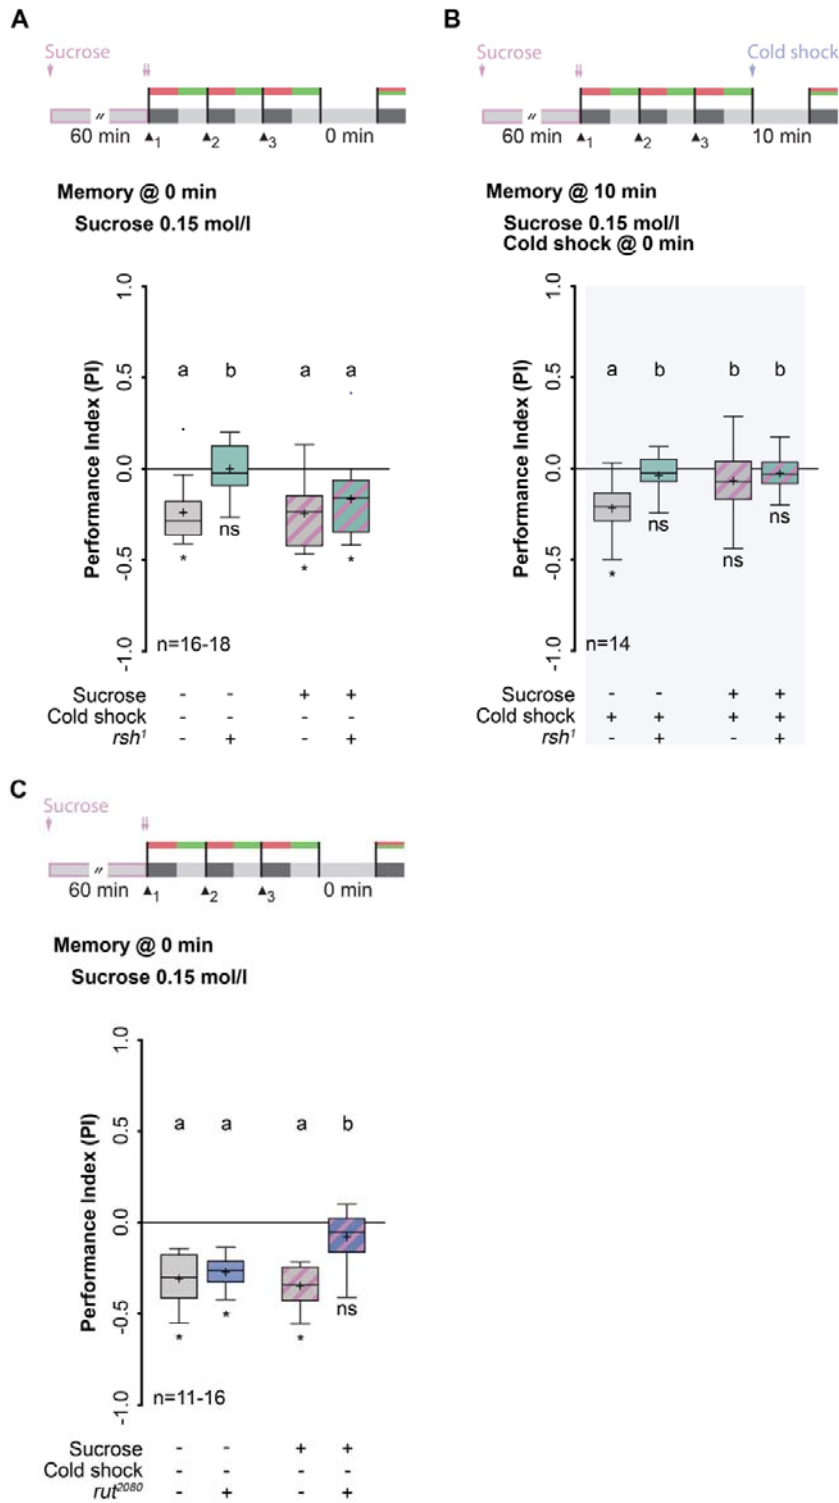

533

534 **Fig 2. Sucrose consumption gates a cAMP-dependent memory and inactivates *radish*-**  
535 **dependent IARM.**

536 (A) Top: Training and treatment protocol. Memory was tested directly after training. Bottom:  
537 After sucrose consumption, memory formation is no longer impaired in *rsh<sup>1</sup>* mutants. (B)  
538 Top: Training and treatment protocol. Cold shock was applied to all groups. Memory was  
539 tested 10 min after training. Bottom: Memory in *rsh<sup>1</sup>* mutants after sucrose consumption is  
540 sensitive to cold shock treatment since they showed a complete memory loss. (C) Top:  
541 Training and treatment protocol. Memory was tested directly after training. Bottom: Sucrose  
542 consumption causes memory loss in *rut<sup>2080</sup>* mutants. Wild-type larvae fed either on tap water  
543 or sucrose and *rut<sup>2080</sup>* mutant larvae fed only on tap water showed memory formation  
544 indistinguishable from each other. Memory performance above the level of chance was tested  
545 using Bonferroni-corrected one-sample t-tests or Wilcoxon signed-rank test (ns  $p \geq 0.0125$ ; \*  
546  $p < 0.0125$ ;  $\alpha = 0.0125$ ). Differences between groups were determined using two-way ANOVA  
547 followed by Bonferroni *post-hoc* pairwise comparisons. Lowercase letters indicate differences  
548 between groups ( $p < 0.05$ ). For more statistical details see also Table S1 and S3. Data are  
549 shown as Tukey box plots; line, median; cross, mean; box, 75th-25th percentiles; whiskers,  
550 1.5 interquartile range; small circles, outlier ( $n \geq 8$ ). *rsh*, *radish*; *rut*, *rutabaga*.

551

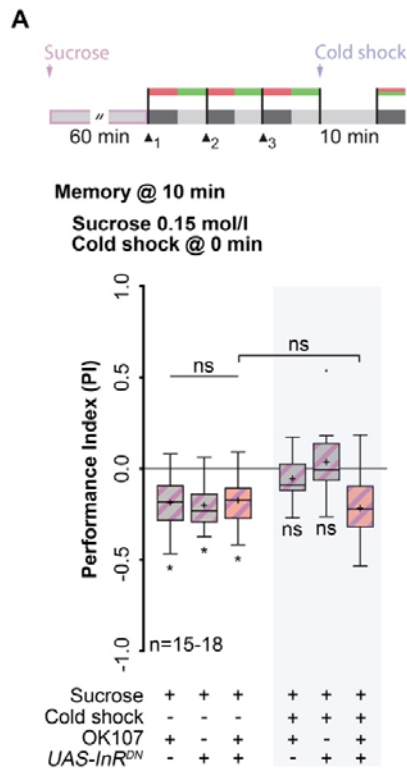

552

553 **Fig 3. Activity of the insulin receptor is necessary for suppression of IARM after sucrose**  
 554 **consumption.**

555 (A) Top: Training and treatment protocols. All groups consumed sucrose for 60 min and  
 556 identification of IARM was carried out by applying a cold shock directly after training.  
 557 Memory was tested 10 min after training. Bottom: Expression of the dominant negative form  
 558 of the insulin receptor (*UAS-InR<sup>DN</sup>*) in KCs using the driver line OK107 prevents the  
 559 suppression of IARM formation triggered by sucrose consumption. Memory performance  
 560 above the level of chance was tested using Bonferroni-corrected one-sample t-tests (ns  
 561  $p \geq 0.008$ ; \*  $p < 0.008$ ;  $\alpha = 0.008$ ). Differences between the groups were determined using two-  
 562 way ANOVA followed by Bonferroni *post-hoc* pairwise comparisons. Statistically non-  
 563 significant differences between groups ( $p \geq 0.05$ ) are indicated as ns. For more statistical  
 564 details see also Table S1 and S3. Data are shown as Tukey box plots; line, median; cross,

565 mean; box, 75th-25th percentiles; whiskers, 1.5 interquartile range; small circles, outlier  
 566 (n≥8). DN, dominant negative; InR, insulin receptor; KC, Kenyon cell; IARM, larval  
 567 anesthesia resistant memory; UAS, upstream activation sequence.  
 568

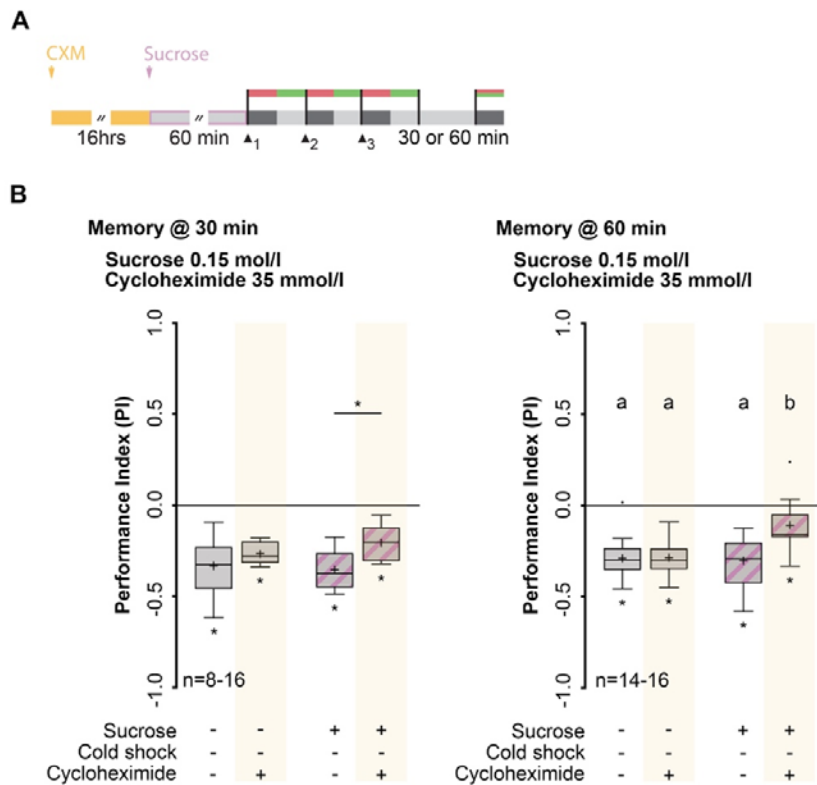

569

570 **Fig 4. Rapid consolidation of ILTM after the consumption of sucrose.**

571 (A) Training and treatment protocols. Before feeding on sucrose, larvae were fed for 16 hours  
 572 on CXM. Memory was tested 30 and 60 min after training. (B) Sucrose consumption gates  
 573 rapid formation of a protein synthesis-dependent ILTM. Memory tested 30 min after training  
 574 was only statistically different between larvae that consumed sucrose with or without CXM  
 575 treatment. After CXM treatment, larvae that consumed sucrose showed only a slight memory  
 576 60 min after training, which was statistically significant different to all other groups of larvae.  
 577 However, it was not completely abolished. Memory performance above the level of chance

578 was tested using Bonferroni-corrected one-sample t-tests (ns  $p \geq 0.0125$ ; \*  $p < 0.0125$ ;  
579  $\alpha = 0.0125$ ). Differences between groups were determined using two-way ANOVA followed  
580 by Bonferroni *post-hoc* pairwise comparisons. Lowercase letters indicate differences between  
581 groups ( $p < 0.05$ ). For more statistical details see also Table S1 and S3. Data are shown as  
582 Tukey box plots; line, median; cross, mean; box, 75th-25th percentiles; whiskers, 1.5  
583 interquartile range; small circles, outlier ( $n \geq 8$ ). CXM, cycloheximide; ILTM, larval long-term  
584 memory.  
585

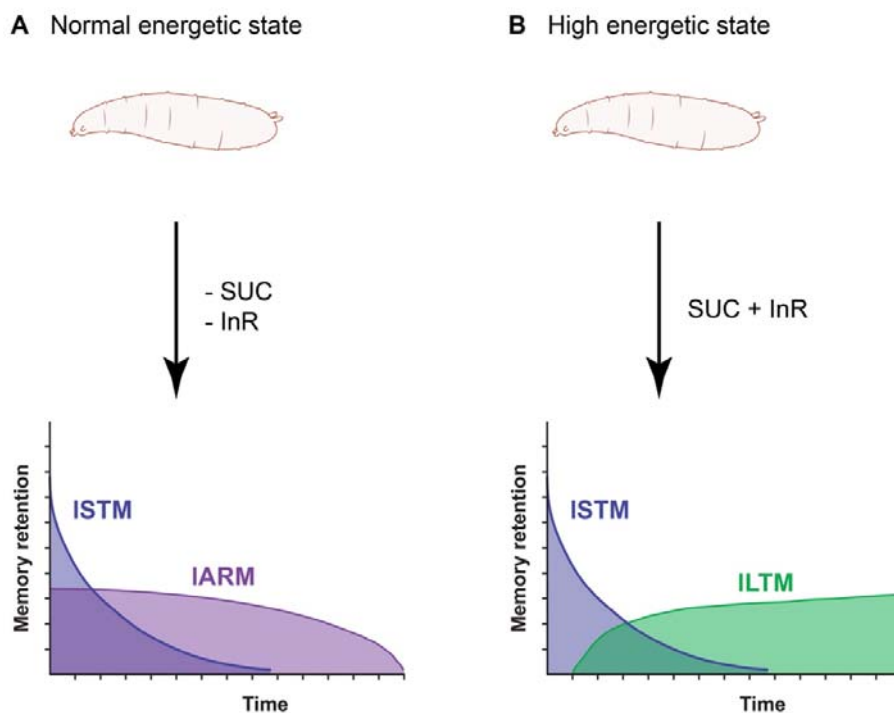

586

587 **Fig 5. Working hypothesis on the state-dependent switch between ILTM and IARM after**  
588 **elevating the energetic state of *Drosophila* larvae.**

589 (A) In the absence of sucrose or by downregulation of the InR in the MB KCs *Drosophila*  
590 larvae form ISTM and IARM. (B) By feeding sucrose prior to conditioning ILTM formation  
591 instead of IARM is triggered, and this is dependent on the activity of the InR in the MB KCs.

592 IARM, larval anesthesia resistant memory; ILTM, larval long-term memory; ISTM, larval  
593 short-term memory; InR, insulin receptor; SUC, sucrose.



594 **References**

- 595 1. Kandel ER, Dudai Y, Mayford MR. The molecular and systems biology of memory.  
596 Cell. 2014;157: 163–186. doi:10.1016/j.cell.2014.03.001
- 597 2. Dukas R. Costs of memory: Ideas and predictions. J Theor Biol. 1999.  
598 doi:10.1006/jtbi.1998.0856
- 599 3. Johnston TD. Selective Costs and Benefits in the Evolution of Learning. Adv Study  
600 Behav. 1982. doi:10.1016/S0065-3454(08)60046-7
- 601 4. Burns JG, Foucaud J, Mery F. Costs of memory: Lessons from “mini” brains.  
602 Proceedings of the Royal Society B: Biological Sciences. 2011.  
603 doi:10.1098/rspb.2010.2488
- 604 5. Dunlap AS, Stephens DW. Components of change in the evolution of learning and  
605 unlearned preference. Proc R Soc B Biol Sci. 2009. doi:10.1098/rspb.2009.0602
- 606 6. Burger JMS, Kolss M, Pont J, Kawecki TJ. Learning ability and longevity: A  
607 symmetrical evolutionary trade-off in *Drosophila*. Evolution (N Y). 2008;62: 1294–  
608 304. doi:10.1111/j.1558-5646.2008.00376.x
- 609 7. Mery F, Kawecki TJ. A fitness cost of learning ability in *Drosophila melanogaster*.  
610 Proc R Soc B Biol Sci. 2003;270: 2465–9. doi:10.1098/rspb.2003.2548
- 611 8. Lagasse F, Moreno C, Preat T, Mery F. Functional and evolutionary trade-offs co-  
612 occur between two consolidated memory phases in *Drosophila melanogaster*. Proc R  
613 Soc B Biol Sci. 2012;279: 4015–23. doi:10.1098/rspb.2012.1457
- 614 9. Evans Lisa J, Smith Karen E, Raine NE. Fast learning in free-foraging bumble bees is  
615 negatively correlated with lifetime resource collection. Sci Rep. 2017.  
616 doi:10.1038/s41598-017-00389-0

- 617 10. Christiansen IC, Szin S, Schausberger P. Benefit-cost Trade-offs of Early Learning in  
618 Foraging Predatory Mites *Amblyseius Swirskii*. *Sci Rep*. 2016. doi:10.1038/srep23571
- 619 11. Kotrschal A, Rogell B, Bundsen A, Svensson B, Zajitschek S, Brännström I, et al.  
620 Artificial selection on relative brain size in the guppy reveals costs and benefits of  
621 evolving a larger brain. *Curr Biol*. 2013. doi:10.1016/j.cub.2012.11.058
- 622 12. Snell-Rood EC, Davidowitz G, Papaj DR. Reproductive tradeoffs of learning in a  
623 butterfly. *Behav Ecol*. 2011. doi:10.1093/beheco/arq169
- 624 13. Jaumann S, Scudelari R, Naug D. Energetic cost of learning and memory can cause  
625 cognitive impairment in honeybees. *Biol Lett*. 2013. doi:10.1098/rsbl.2013.0149
- 626 14. Mery F, Kawecki TJ. A cost of long-term memory in *Drosophila*. *Science* (80- ). 2005.  
627 doi:10.1126/science.1111331
- 628 15. Placais PY, Preat T. To favor survival under food shortage, the brain disables costly  
629 memory. *Science*. 2013;339: 440–442. doi:10.1126/science.1226018
- 630 16. McGuire SE, Deshazer M, Davis RL. Thirty years of olfactory learning and memory  
631 research in *Drosophila melanogaster*. *Prog Neurobiol*. 2005;76: 328–347.  
632 doi:10.1016/j.pneurobio.2005.09.003
- 633 17. Tully T, Preat T, Boynton SC, Del Vecchio M. Genetic dissection of consolidated  
634 memory in *Drosophila*. *Cell*. 1994;79: 35–47. doi:10.1016/0092-8674(94)90398-0
- 635 18. Isabel G, Pascual A, Preat T. Exclusive Consolidated Memory Phases in *Drosophila*.  
636 *Science*. 2004;304: 1024–1027. doi:10.1126/science.1094932
- 637 19. Placais PY, de Tredern E, Scheunemann L, Trannoy S, Goguel V, Han KA, et al.  
638 Upregulated energy metabolism in the *Drosophila* mushroom body is the trigger for  
639 long-term memory. *Nat Commun*. 2017;8: 15510. doi:10.1038/ncomms15510

- 640 20. Placais PY, Trannoy S, Isabel G, Aso Y, Siwanowicz I, Belliard-Guerin G, et al. Slow  
641 oscillations in two pairs of dopaminergic neurons gate long-term memory formation in  
642 *Drosophila*. *Nat Neurosci*. 2012;15: 592–599. doi:10.1038/nn.3055
- 643 21. Widmann A, Eichler K, Selcho M, Thum ASASS, Pauls D. Odor-taste learning in  
644 *Drosophila* larvae. *J Insect Physiol*. 2017;106: 47–54.  
645 doi:10.1016/j.jinsphys.2017.08.004
- 646 22. Eichler K, Li F, Litwin-Kumar A, Park Y, Andrade I, Schneider-Mizell CM, et al. The  
647 complete connectome of a learning and memory centre in an insect brain. *Nature*.  
648 2017;548: 175–182. doi:10.1038/nature23455
- 649 23. Thum AS, Gerber B. Connectomics and function of a memory network: the mushroom  
650 body of larval *Drosophila*. *Curr Opin Neurobiol*. 2019;54: 146–154.  
651 doi:10.1016/j.conb.2018.10.007
- 652 24. Widmann A, Artinger M, Biesinger L, Boepple K, Peters C, Schlechter J, et al. Genetic  
653 Dissection of Aversive Associative Olfactory Learning and Memory in *Drosophila*  
654 Larvae. *PLoS Genet*. 2016;12: e1006378. doi:10.1371/journal.pgen.1006378
- 655 25. Niewalda T, Singhal N, Fiala A, Saumweber T, Wegener S, Gerber B. Salt processing  
656 in larval *drosophila*: Choice, feeding, and learning shift from appetitive to aversive in a  
657 concentration-dependent way. *Chem Senses*. 2008;33: 685–692.  
658 doi:10.1093/chemse/bjn037
- 659 26. Ugrankar R, Theodoropoulos P, Akdemir F, Henne WM, Graff JM. Circulating glucose  
660 levels inversely correlate with *Drosophila* larval feeding through insulin signaling and  
661 SLC5A11. *Commun Biol*. 2018;1: 110. doi:10.1038/s42003-018-0109-4
- 662 27. Rohwedder A, Pfitzenmaier JE, Ramsperger N, Apostolopoulou AA, Widmann A,

- 663 Thum AS. Nutritional value-dependent and nutritional value-independent effects on  
664 *Drosophila melanogaster* larval behavior. *Chem Senses*. 2012;37: 711–2.  
665 doi:10.1093/chemse/bjs055
- 666 28. Folkers E, Drain P, Quinn WG. Radish, a *Drosophila* mutant deficient in consolidated  
667 memory. *Proc Natl Acad Sci U S A*. 1993;90: 8123–7. doi:10.1073/pnas.90.17.8123
- 668 29. Honjo K, Furukubo-Tokunaga K. Distinctive Neuronal Networks and Biochemical  
669 Pathways for Appetitive and Aversive Memory in *Drosophila* Larvae. *J Neurosci*.  
670 2009;29: 852–862. doi:10.1523/JNEUROSCI.1315-08.2009
- 671 30. Khurana S, Abubaker M Bin, Siddiqi O. Odour avoidance learning in the larva of  
672 *Drosophila melanogaster*. *J Biosci*. 2009;34: 621–631. doi:10.1007/s12038-009-0080-9
- 673 31. Livingstone MS, Sziber PP, Quinn WG. Loss of calcium/calmodulin responsiveness in  
674 adenylate cyclase of rutabaga, a *Drosophila* learning mutant. *Cell*. 1984;37: 205–215.  
675 doi:10.1016/0092-8674(84)90316-7
- 676 32. Garofalo RS. Genetic analysis of insulin signaling in *Drosophila*. *Trends Endocrinol*  
677 *Metab*. 2002;13: 156–62. doi:10.1016/S1043-2760(01)00548-3
- 678 33. Nässel DR, Kubrak OI, Liu Y, Luo J, Lushchak O V. Factors that regulate insulin  
679 producing cells and their output in *Drosophila*. *Front Physiol*. 2013;4: 252.  
680 doi:10.3389/fphys.2013.00252
- 681 34. Fernandez R, Tabarini D, Azpiazu N, Frasch M, Schlessinger J. The *Drosophila* insulin  
682 receptor homolog: a gene essential for embryonic development encodes two receptor  
683 isoforms with different signaling potential. *EMBO J*. 1995;14: 3373–84.  
684 doi:10.1002/j.1460-2075.1995.tb07343.x
- 685 35. Tanabe K, Itoh M, Tonoki A. Age-Related Changes in Insulin-like Signaling Lead to

- 686 Intermediate-Term Memory Impairment in *Drosophila*. *Cell Rep.* 2017;18: 1598–1605.  
687 doi:10.1016/j.celrep.2017.01.053
- 688 36. Chambers DB, Androschuk A, Rosenfelt C, Langer S, Harding M, Bolduc F V. Insulin  
689 signaling is acutely required for long-term memory in *Drosophila*. *Front Neural*  
690 *Circuits.* 2015;9: 1–7. doi:10.3389/fncir.2015.00008
- 691 37. Luo J, Liu Y, Nässel DR. Insulin/IGF-Regulated Size Scaling of Neuroendocrine Cells  
692 Expressing the bHLH Transcription Factor Dimmed in *Drosophila*. *PLoS Genet.*  
693 2013;9: e1004052. doi:10.1371/journal.pgen.1004052
- 694 38. Alyagor I, Berkun V, Keren-Shaul H, Marmor-Kollet N, David E, Mayseless O, et al.  
695 Combining Developmental and Perturbation-Seq Uncovers Transcriptional Modules  
696 Orchestrating Neuronal Remodeling. *Dev Cell.* 2018. doi:10.1016/j.devcel.2018.09.013
- 697 39. Heisenberg M. Mushroom body memoir: From maps to models. *Nat Rev Neurosci.*  
698 2003;4: 266–275. doi:10.1038/nrn1074
- 699 40. Zhao XL, Campos AR. Insulin signalling in mushroom body neurons regulates feeding  
700 behaviour in *Drosophila* larvae. *J Exp Biol.* 2012;215: 2696–702.  
701 doi:10.1242/jeb.066969
- 702 41. Blum AL, Li W, Cressy M, Dubnau J. Short-and long-term memory in *Drosophila*  
703 require cAMP signaling in distinct neuron types. *Curr Biol.* 2009;19: 1341–1350.
- 704 42. Yin JC, Wallach JS, Del Vecchio M, Wilder EL, Zhou H, Quinn WG, et al. Induction  
705 of a dominant negative CREB transgene specifically blocks long-term memory in  
706 *Drosophila*. *Cell.* 1994;79: 49–58.
- 707 43. Bailey CH, Giustetto M, Zhu H, Chen M, Kandel ER. A novel function for serotonin-  
708 mediated short-term facilitation in *Aplysia*: Conversion of a transient, cell-wide

- 709 homosynaptic Hebbian plasticity into a persistent, protein synthesis-independent  
710 synapse-specific enhancement. *Proc Natl Acad Sci.* 2000;97: 11581–11586.  
711 doi:10.1073/pnas.97.21.11581
- 712 44. Fischer A. Distinct Roles of Hippocampal De Novo Protein Synthesis and Actin  
713 Rearrangement in Extinction of Contextual Fear. *J Neurosci.* 2004;24: 1962–1966.  
714 doi:10.1523/JNEUROSCI.5112-03.2004
- 715 45. Lattal KM, Abel T. Different requirements for protein synthesis in acquisition and  
716 extinction of spatial preferences and context-evoked fear. *J Neurosci.* 2001;21: 5773–  
717 5780. doi:21/15/5773 [pii]
- 718 46. Muller U. Learning in honeybees: from molecules to behaviour. *Zool.* 2002;105: 313–  
719 320. doi:10.1078/0944-2006-00075
- 720 47. Tully T, Boynton S, Brandes C, Dura JM, Mihalek R, Preat T, et al. Genetic dissection  
721 of memory formation in *Drosophila melanogaster*. *Cold Spring Harb Symp Quant Biol.*  
722 1990;55: 203–211. doi:10.1101/sqb.1990.055.01.022
- 723 48. Aguila JR, Hoshizaki DK, Gibbs AG. Contribution of larval nutrition to adult  
724 reproduction in *Drosophila melanogaster*. *J Exp Biol.* 2013;216: 399–406.  
725 doi:10.1242/jeb.078311
- 726 49. Wu CL, Chang CC, Wu JK, Chiang MH, Yang CH, Chiang HC. Mushroom body  
727 glycolysis is required for olfactory memory in *Drosophila*. *Neurobiol Learn Mem.*  
728 2018;150: 13–19. doi:10.1016/j.nlm.2018.02.015
- 729 50. Gold PE, Korol DL. Making Memories Matter. *Front Integr Neurosci.* 2012;6: 1–11.  
730 doi:10.3389/fnint.2012.00116
- 731 51. Owusu-Ansah E, Perrimon N. Modeling metabolic homeostasis and nutrient sensing in

- 732           Drosophila: Implications for aging and metabolic diseases. *DMM Disease Models and*  
733           *Mechanisms*. 2014. doi:10.1242/dmm.012989
- 734   52.   Hong SH, Lee KS, Kwak SJ, Kim AK, Bai H, Jung MS, et al. Minibrain/Dyrk1a  
735           Regulates Food Intake through the Sir2-FOXO-sNPF/NPY Pathway in *Drosophila* and  
736           Mammals. *PLoS Genet*. 2012. doi:10.1371/journal.pgen.1002857
- 737   53.   Lee G, Park JH. Hemolymph sugar homeostasis and starvation-induced hyperactivity  
738           affected by genetic manipulations of the adipokinetic hormone-encoding gene in  
739           *Drosophila melanogaster*. *Genetics*. 2004. doi:10.1534/genetics.167.1.311
- 740   54.   Wu Q, Zhao Z, Shen P. Regulation of aversion to noxious food by *Drosophila*  
741           neuropeptide Y- and insulin-like systems. *Nat Neurosci*. 2005. doi:10.1038/nn1540
- 742   55.   Grillo CA, Piroli GG, Lawrence RC, Wrihten SA, Green AJ, Wilson SP, et al.  
743           Hippocampal insulin resistance impairs spatial learning and synaptic plasticity.  
744           *Diabetes*. 2015;64: 3927–36. doi:10.2337/db15-0596
- 745   56.   Suarez AN, Noble EE, Kanoski SE. Regulation of memory function by feeding-  
746           relevant biological systems: Following the breadcrumbs to the hippocampus. *Front Mol*  
747           *Neurosci*. 2019;12: 101. doi:10.3389/fnmol.2019.00101
- 748   57.   Kandel ER. The biology of memory: A forty-year perspective. *J Neurosci*. 2009;29:  
749           12748–12756. doi:10.1523/JNEUROSCI.3958-09.2009
- 750   58.   Claeys I, Simonet G, Poels J, Van Loy T, Vercammen L, De Loof A, et al. Insulin-  
751           related peptides and their conserved signal transduction pathway. *Peptides*. 2002;23:  
752           807–16. doi:10.1016/S0196-9781(01)00666-0
- 753   59.   Pauls D, Selcho M, Gendre N, Stocker RF, Thum AS. *Drosophila* Larvae Establish  
754           Appetitive Olfactory Memories via Mushroom Body Neurons of Embryonic Origin. *J*

- 755           Neurosci. 2010;30: 10655–10666. doi:10.1523/JNEUROSCI.1281-10.2010
- 756   60.   Connolly JB, Roberts IJ, Armstrong JD, Kaiser K, Forte M, Tully T, et al. Associative  
757           learning disrupted by impaired Gs signaling in *Drosophila* mushroom bodies. *Science*.  
758           1996;274: 2104–2107. doi:10.1126/science.274.5295.2104
- 759   61.   Wu Q, Zhang Y, Xu J, Shen P. Regulation of hunger-driven behaviors by neural  
760           ribosomal S6 kinase in *Drosophila*. *Proc Natl Acad Sci U S A*. 2005;102: 13289–  
761           13294. doi:10.1073/pnas.0501914102
- 762   62.   Scherer S, Stocker RF, Gerber B. Olfactory learning in individually assayed *Drosophila*  
763           larvae. *Learn Mem*. 2003;10: 217–225. doi:10.1101/lm.57903
- 764



**A**

Sucrose treatment before training

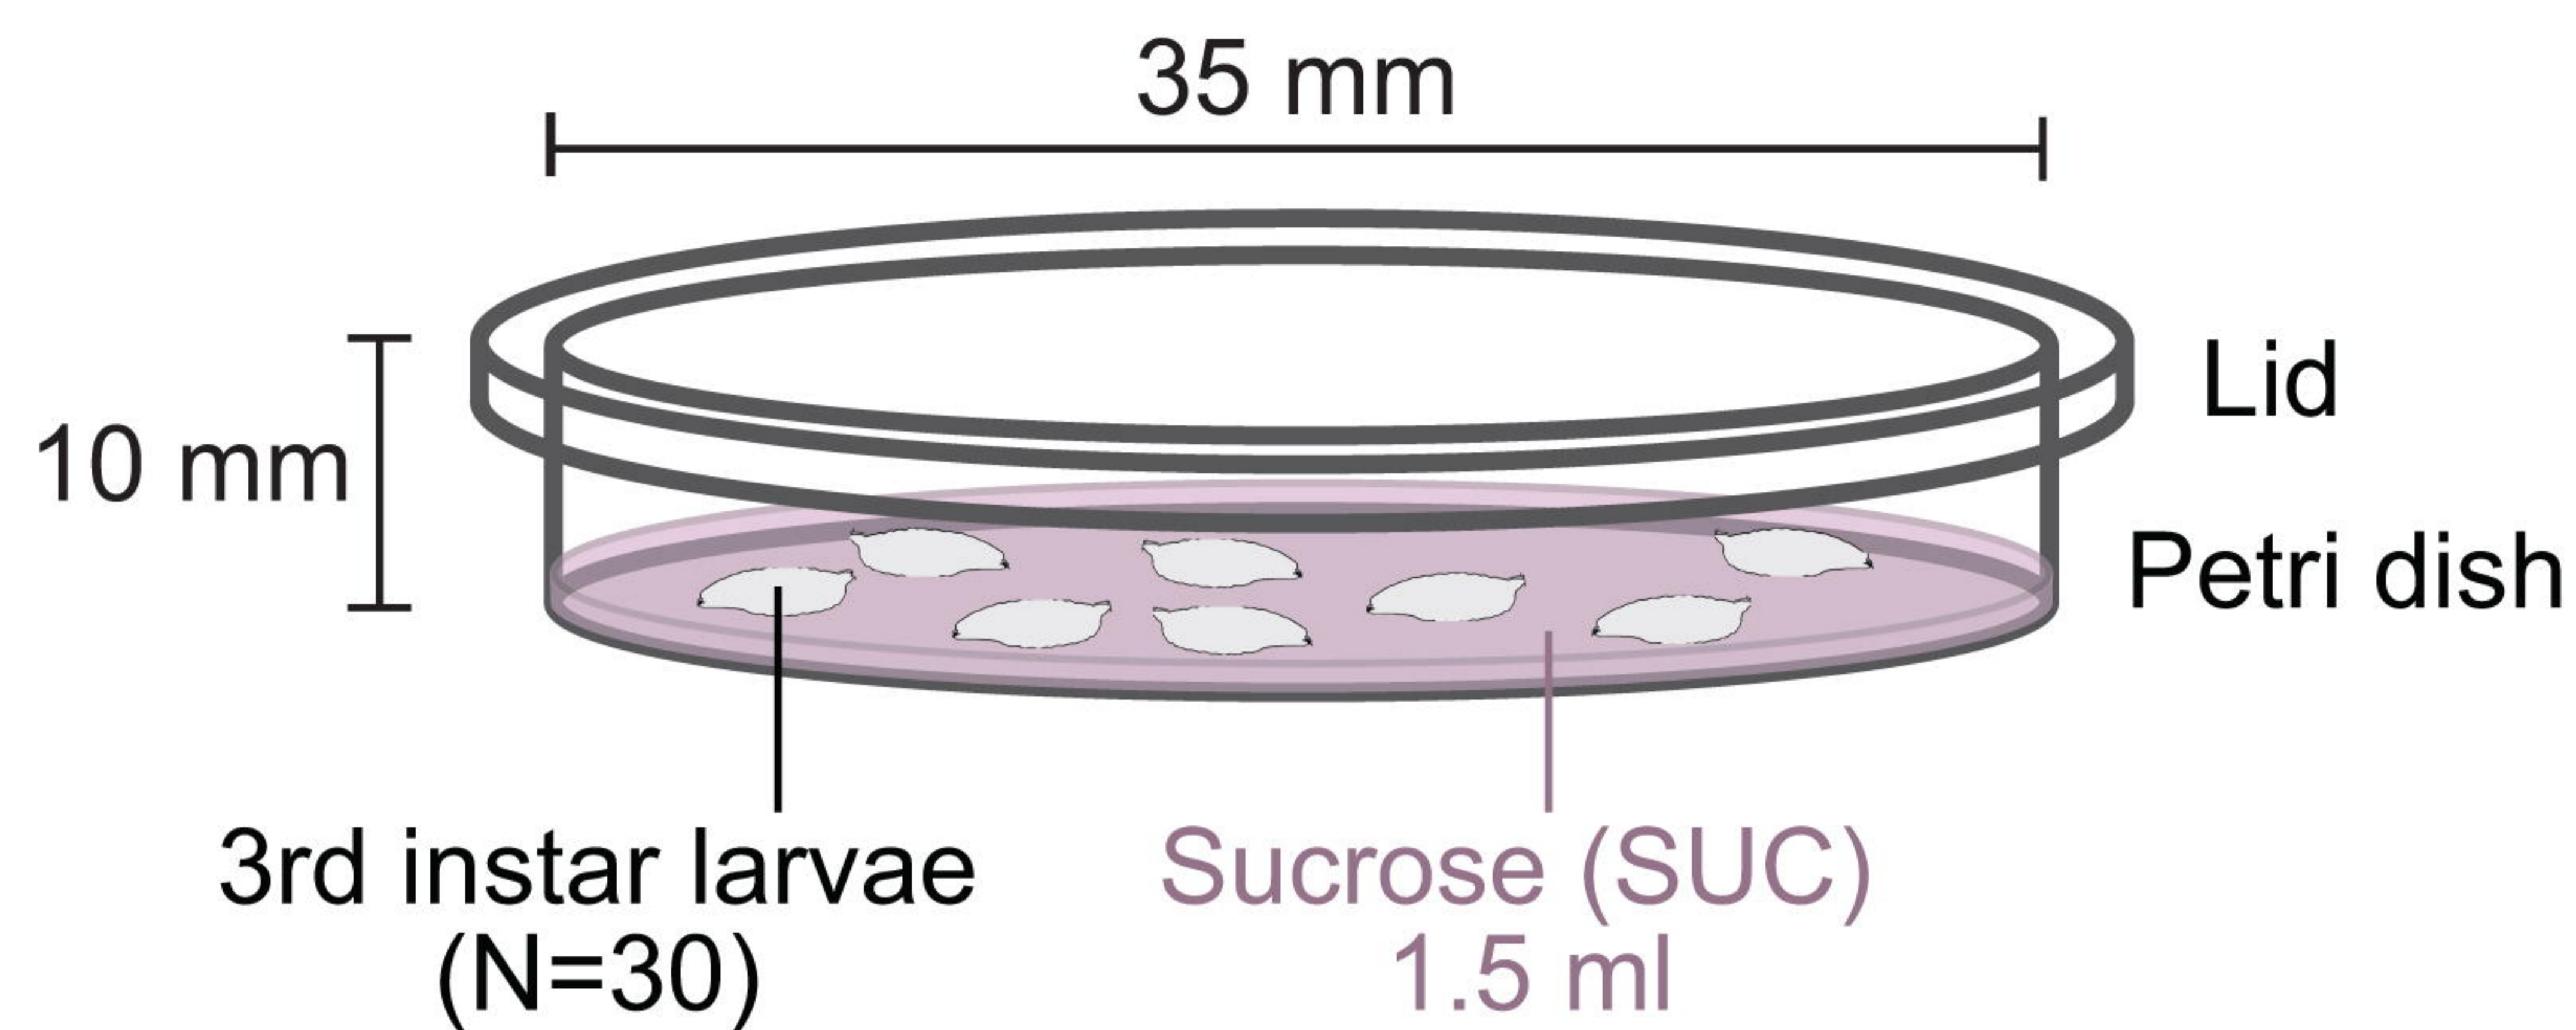

Treatment control (Tap water)

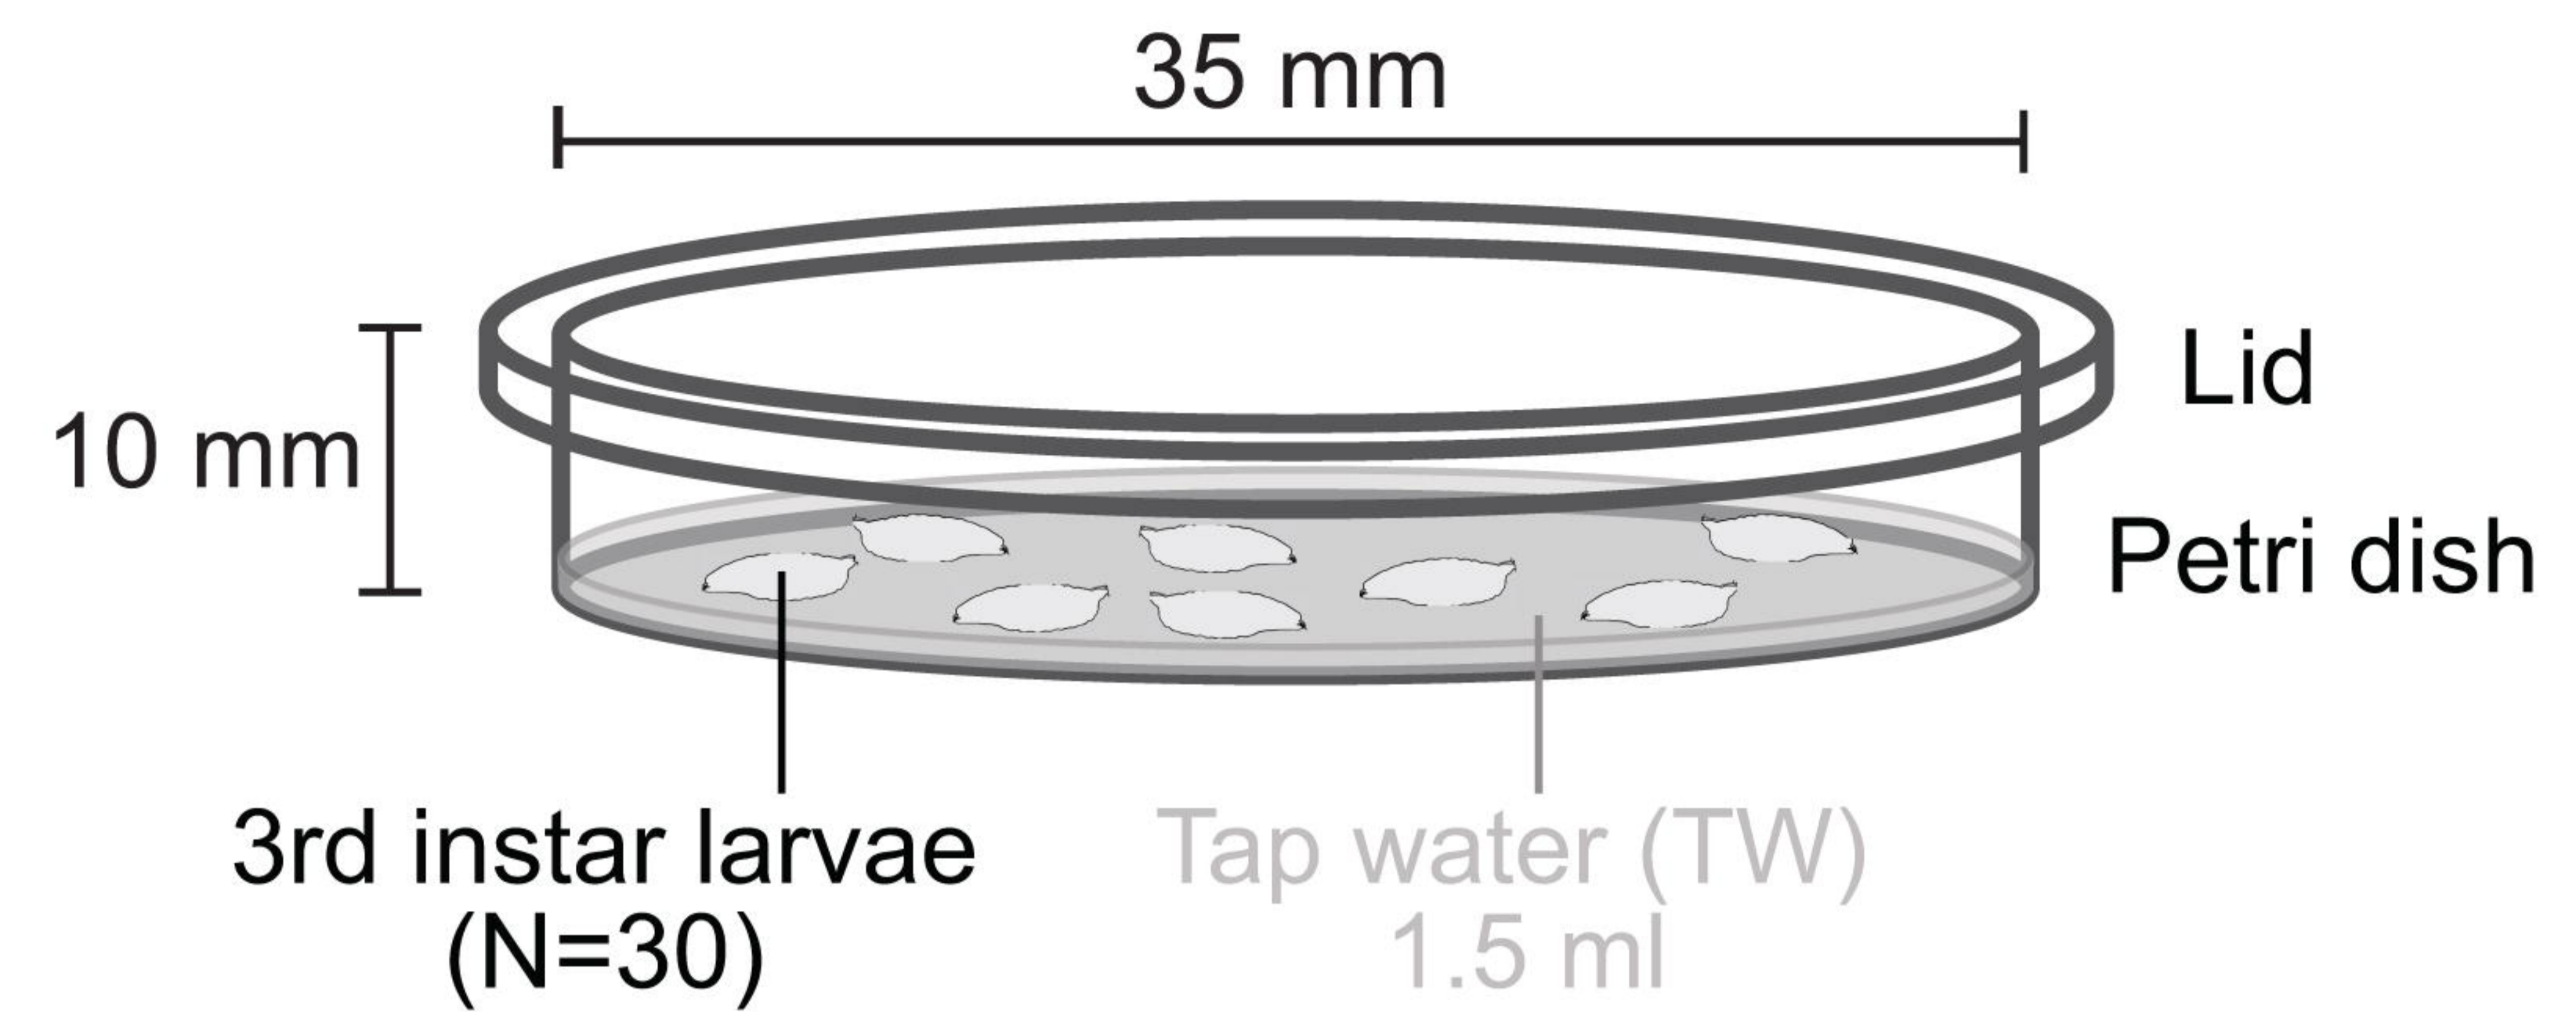**B**

Odor-high salt conditioning

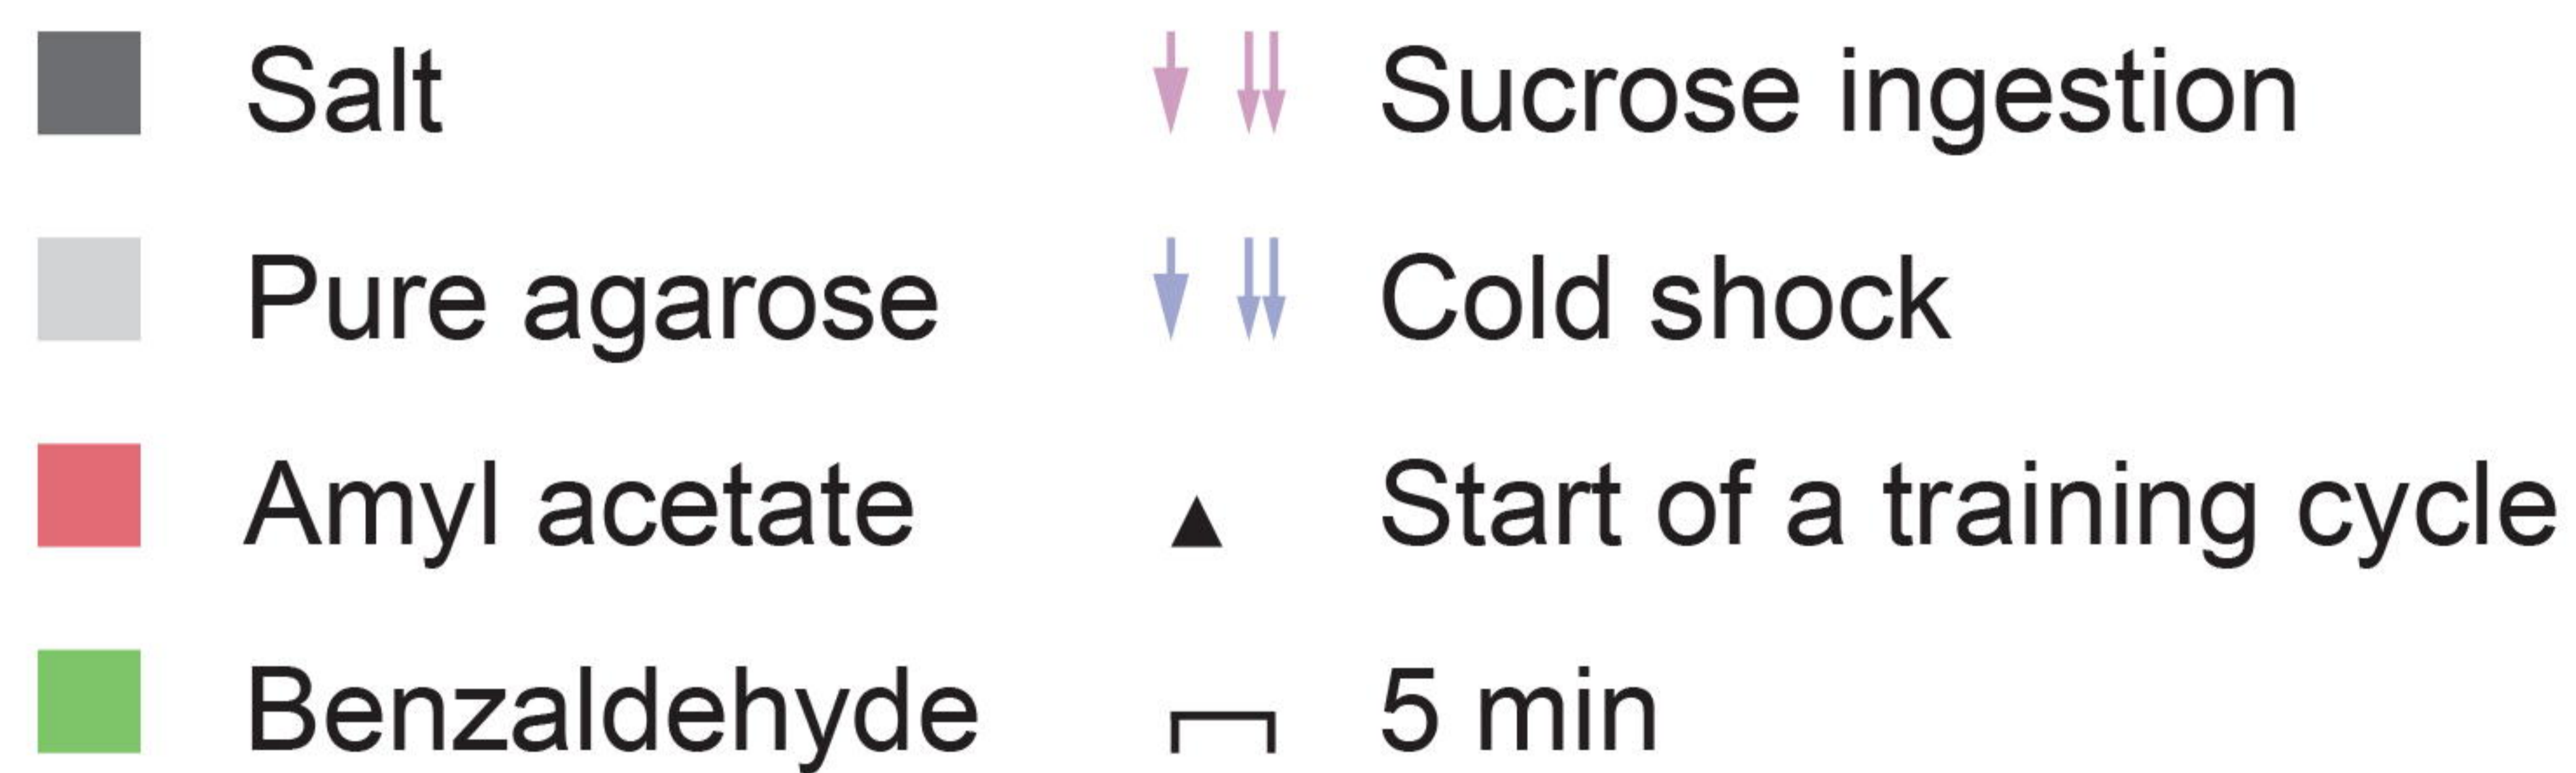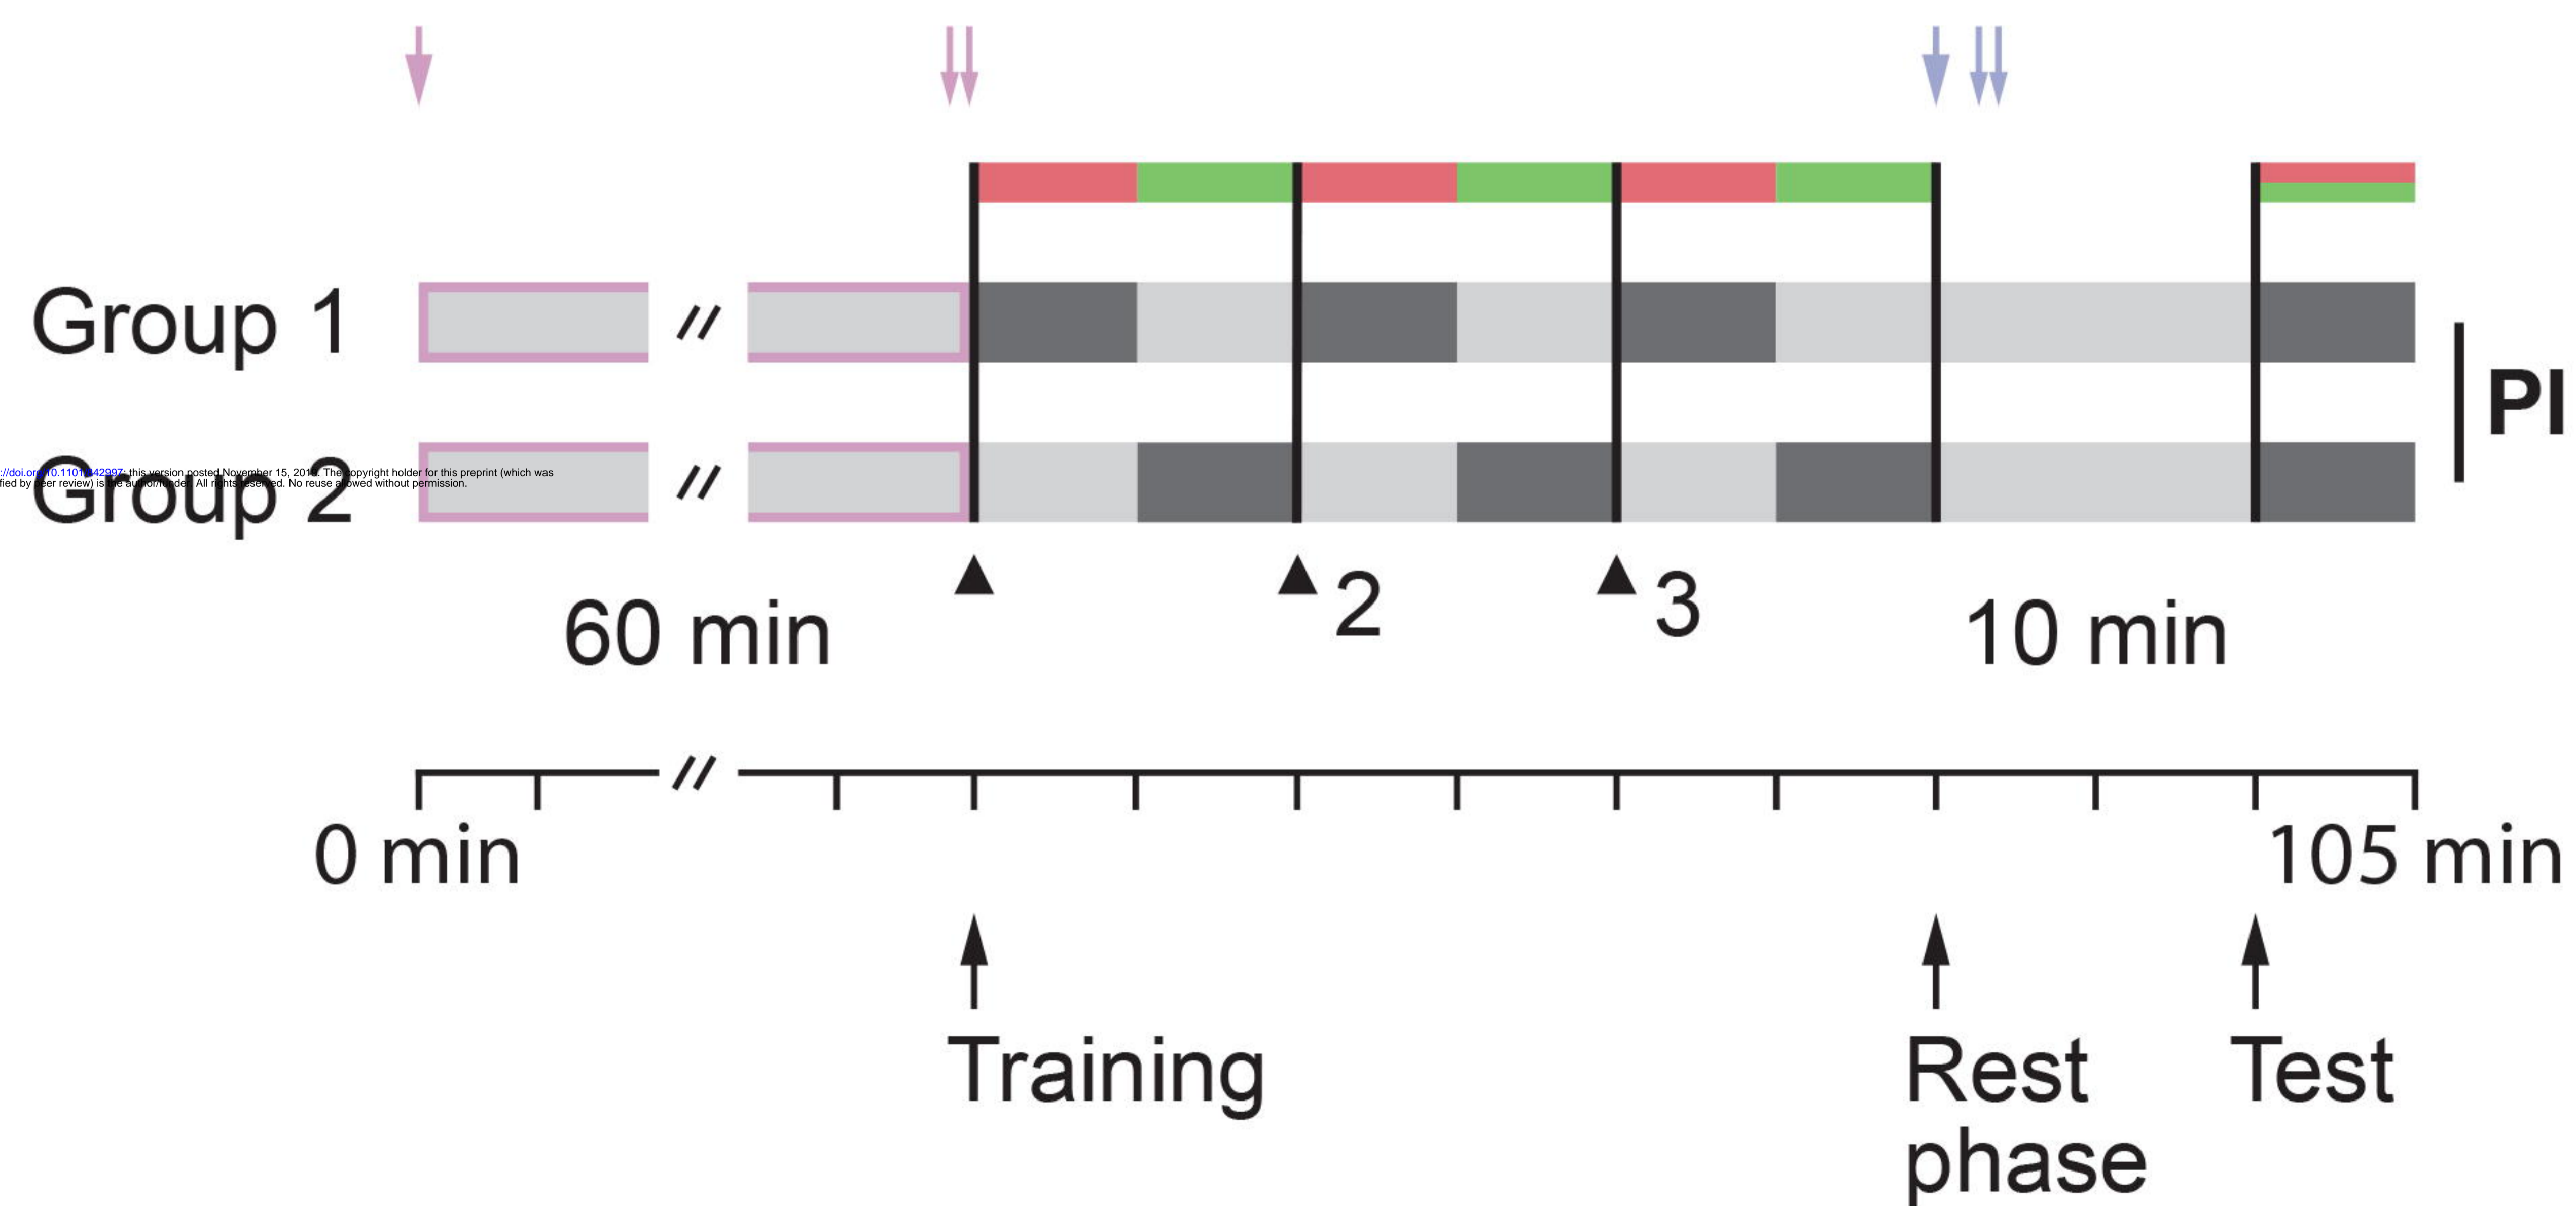**C**

Memory @ 10 min

Sucrose 0.15 mol/l  
Cold shock @ 0 min

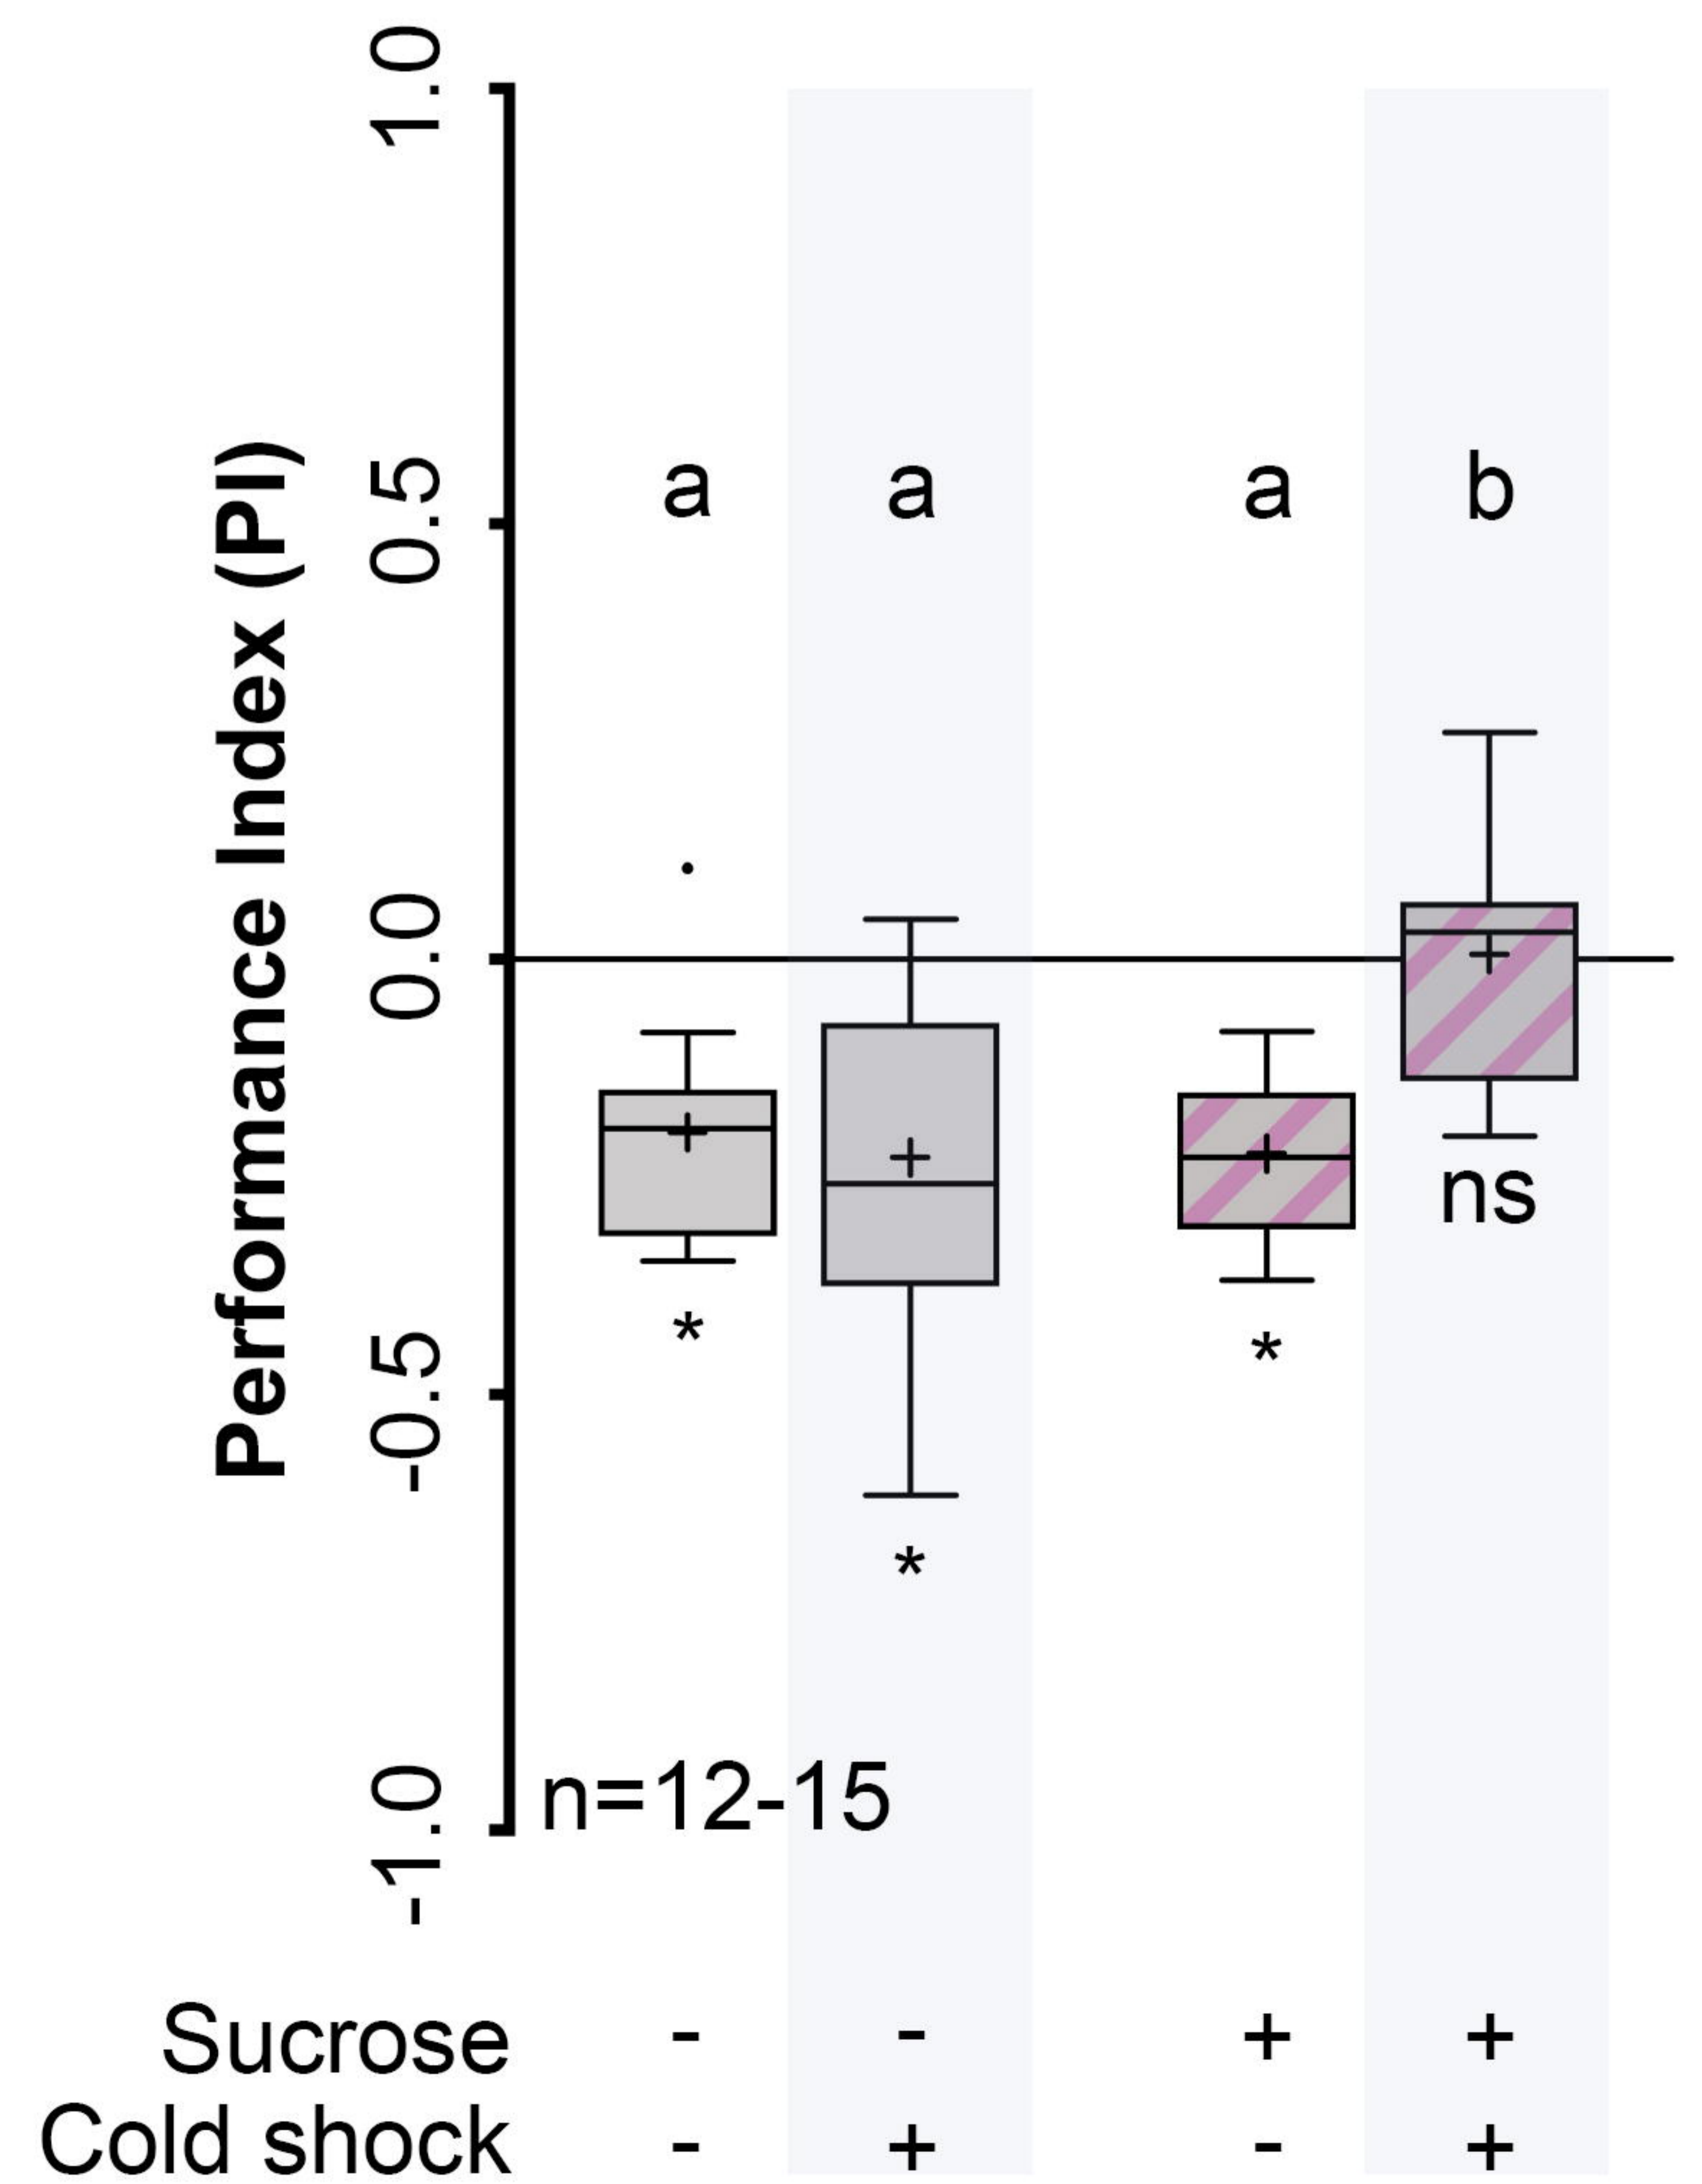

**A**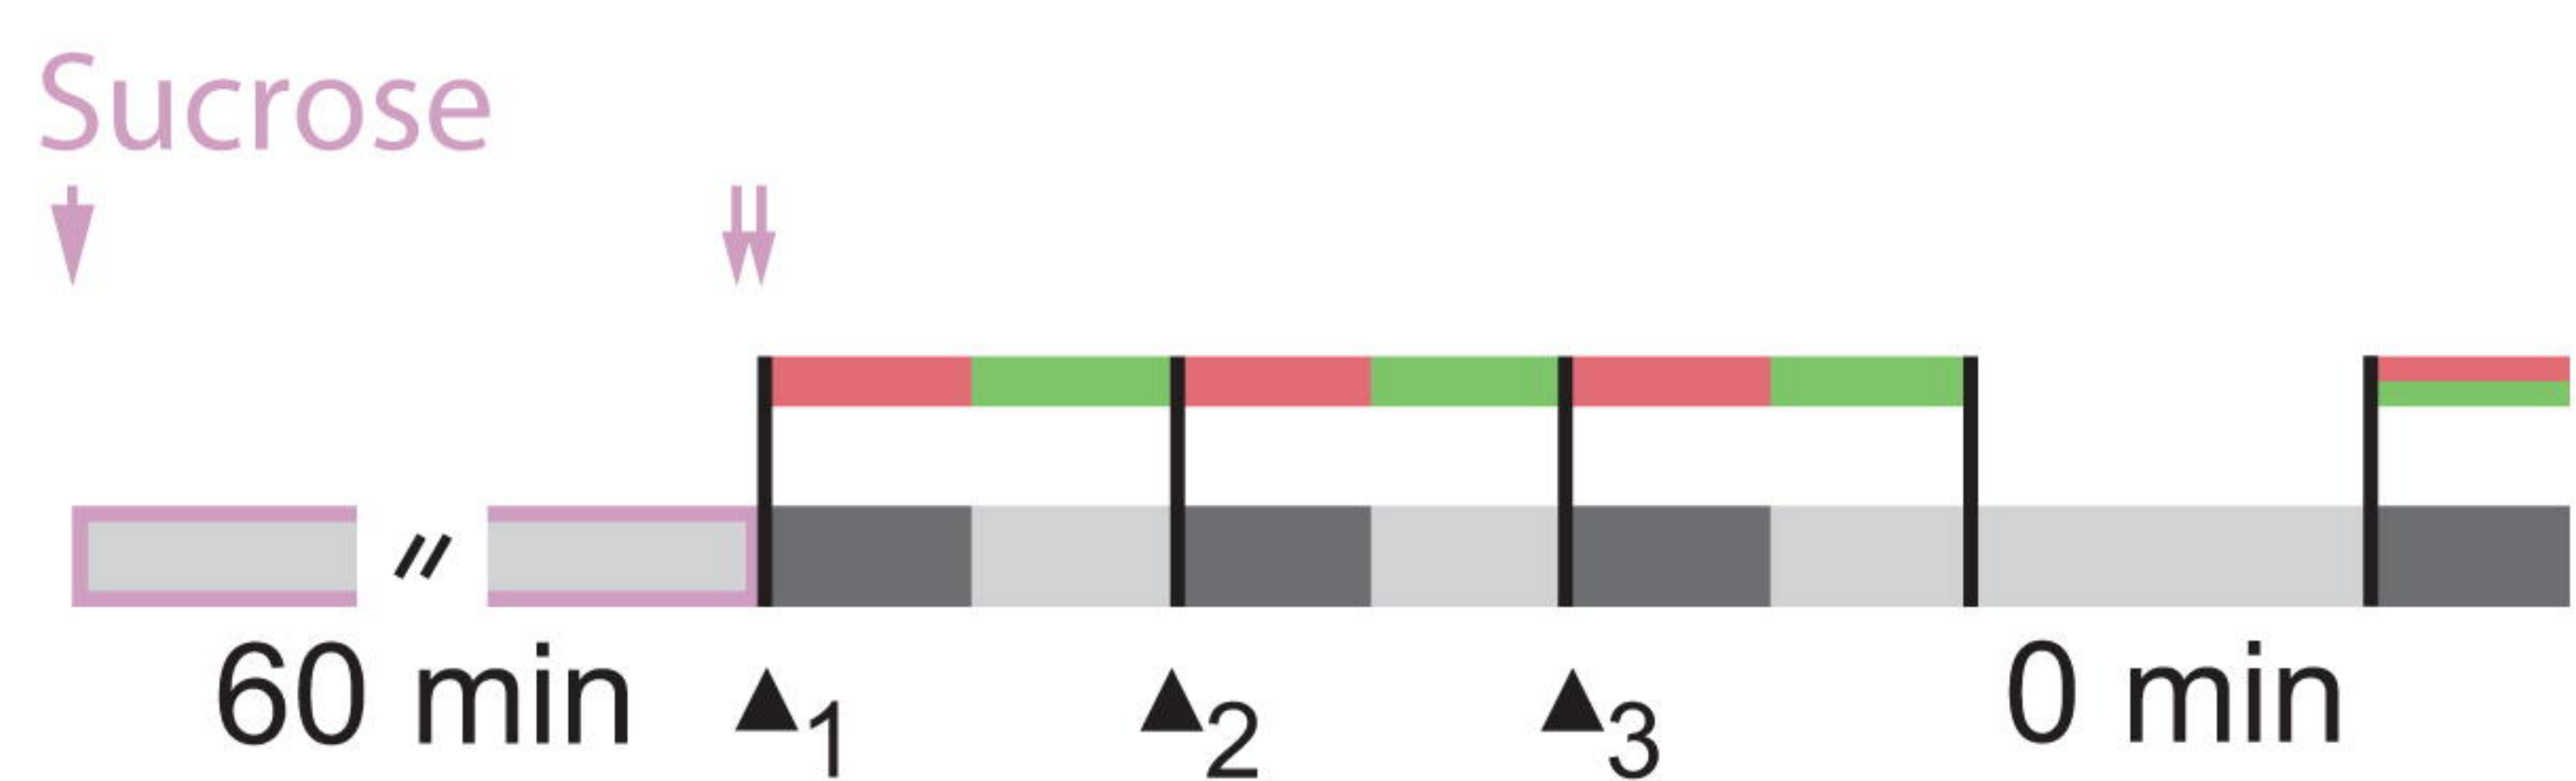**Memory @ 0 min****Sucrose 0.15 mol/l**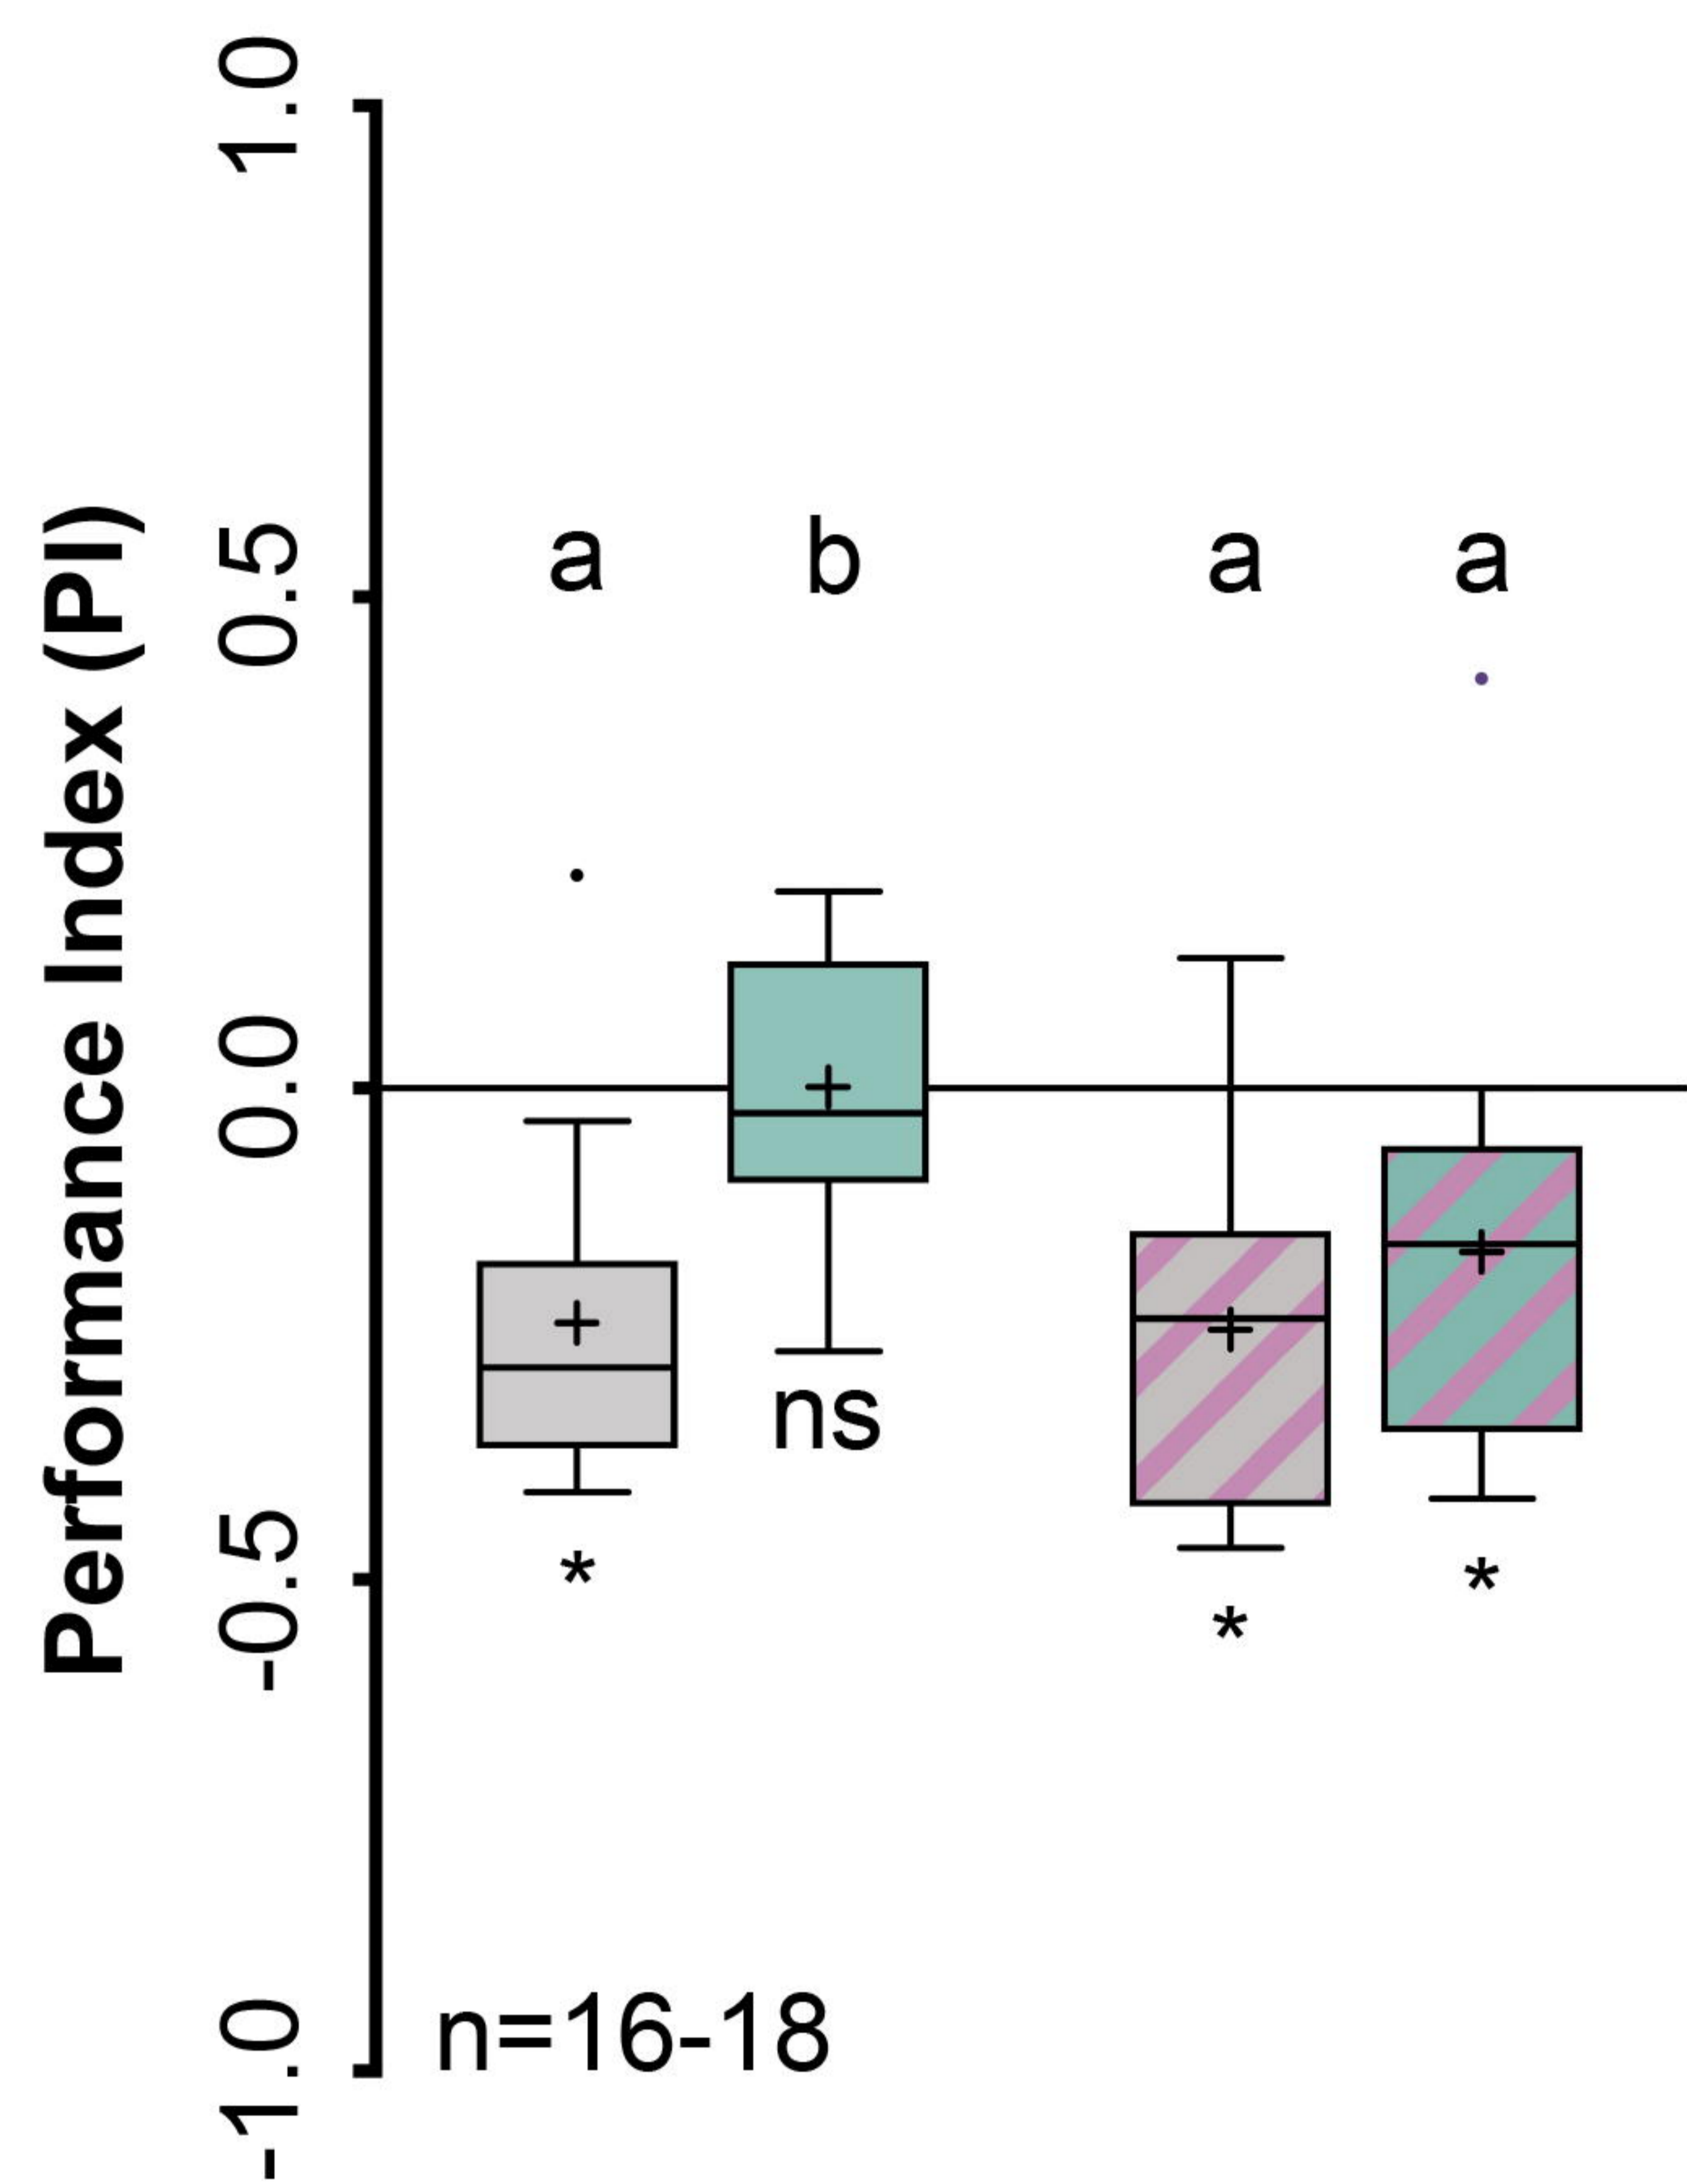

|                         |   |   |   |   |
|-------------------------|---|---|---|---|
| Sucrose                 | - | - | + | + |
| Cold shock              | - | - | - | - |
| <i>rsh</i> <sup>1</sup> | - | + | - | + |

**B**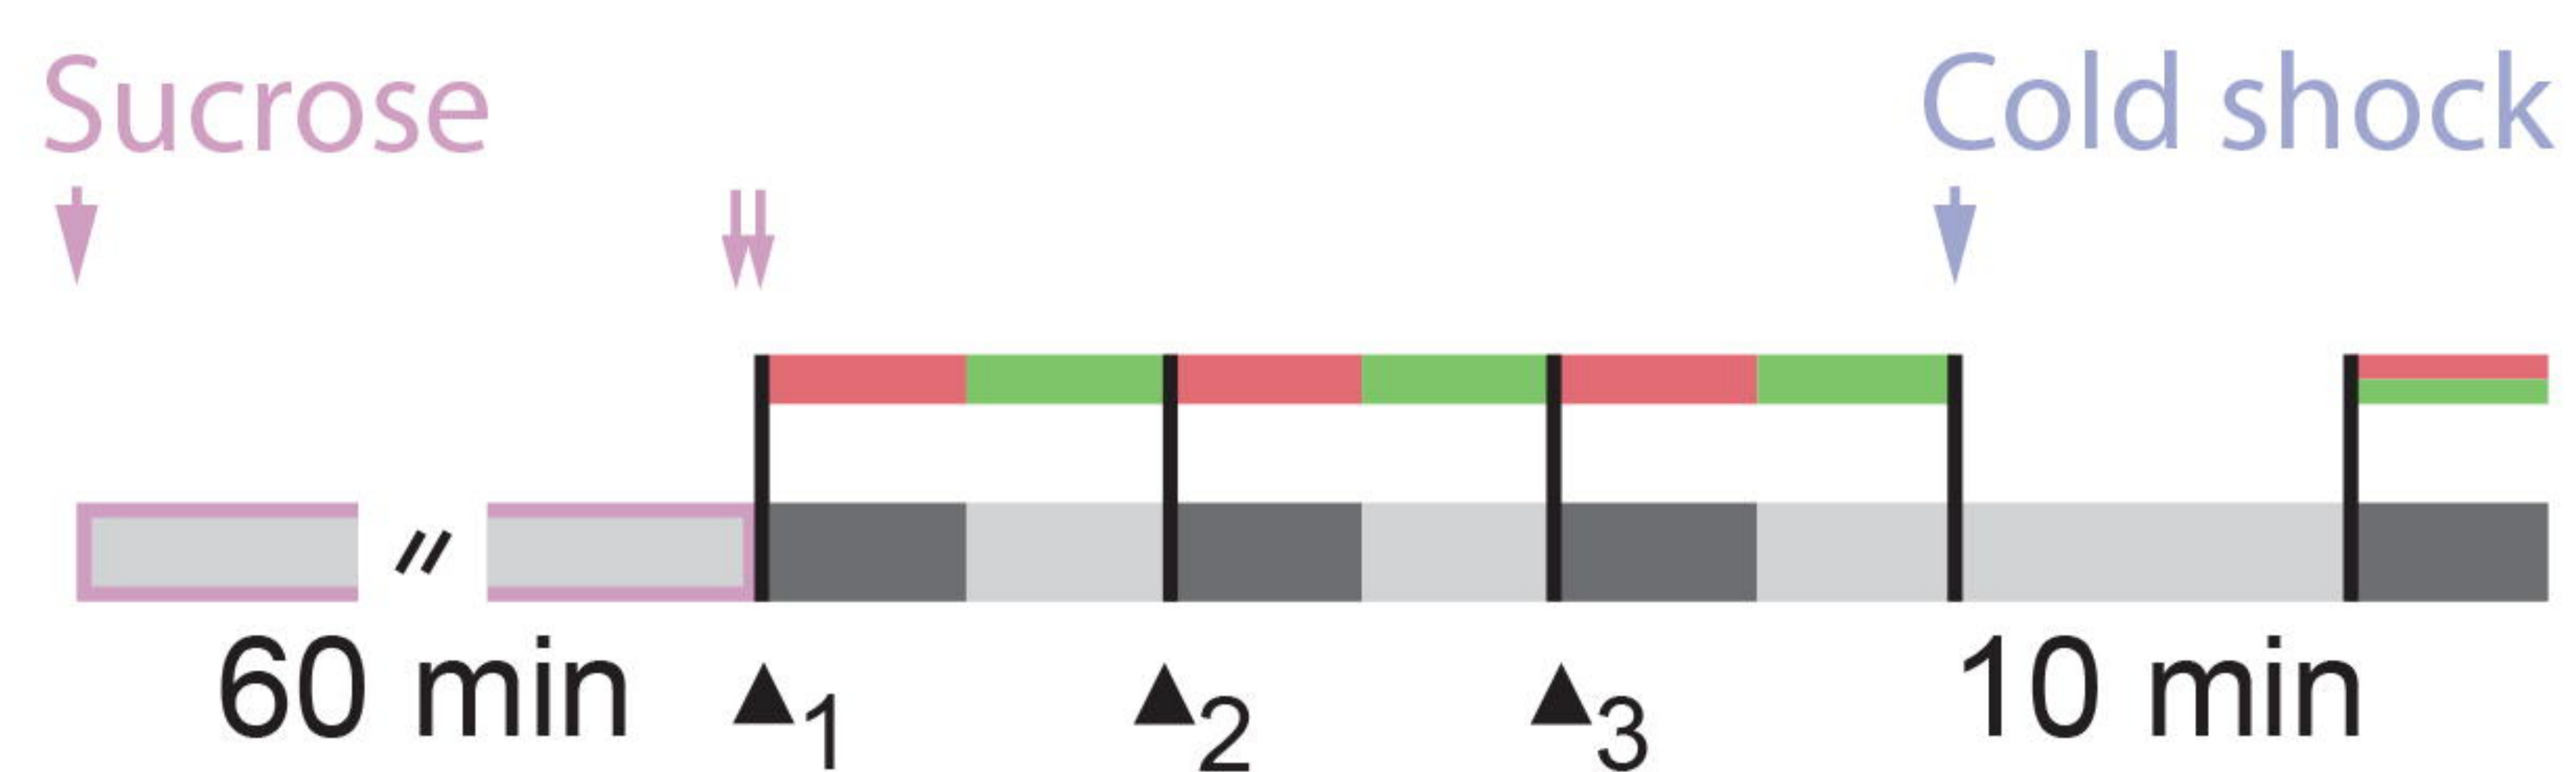**Memory @ 10 min****Sucrose 0.15 mol/l  
Cold shock @ 0 min**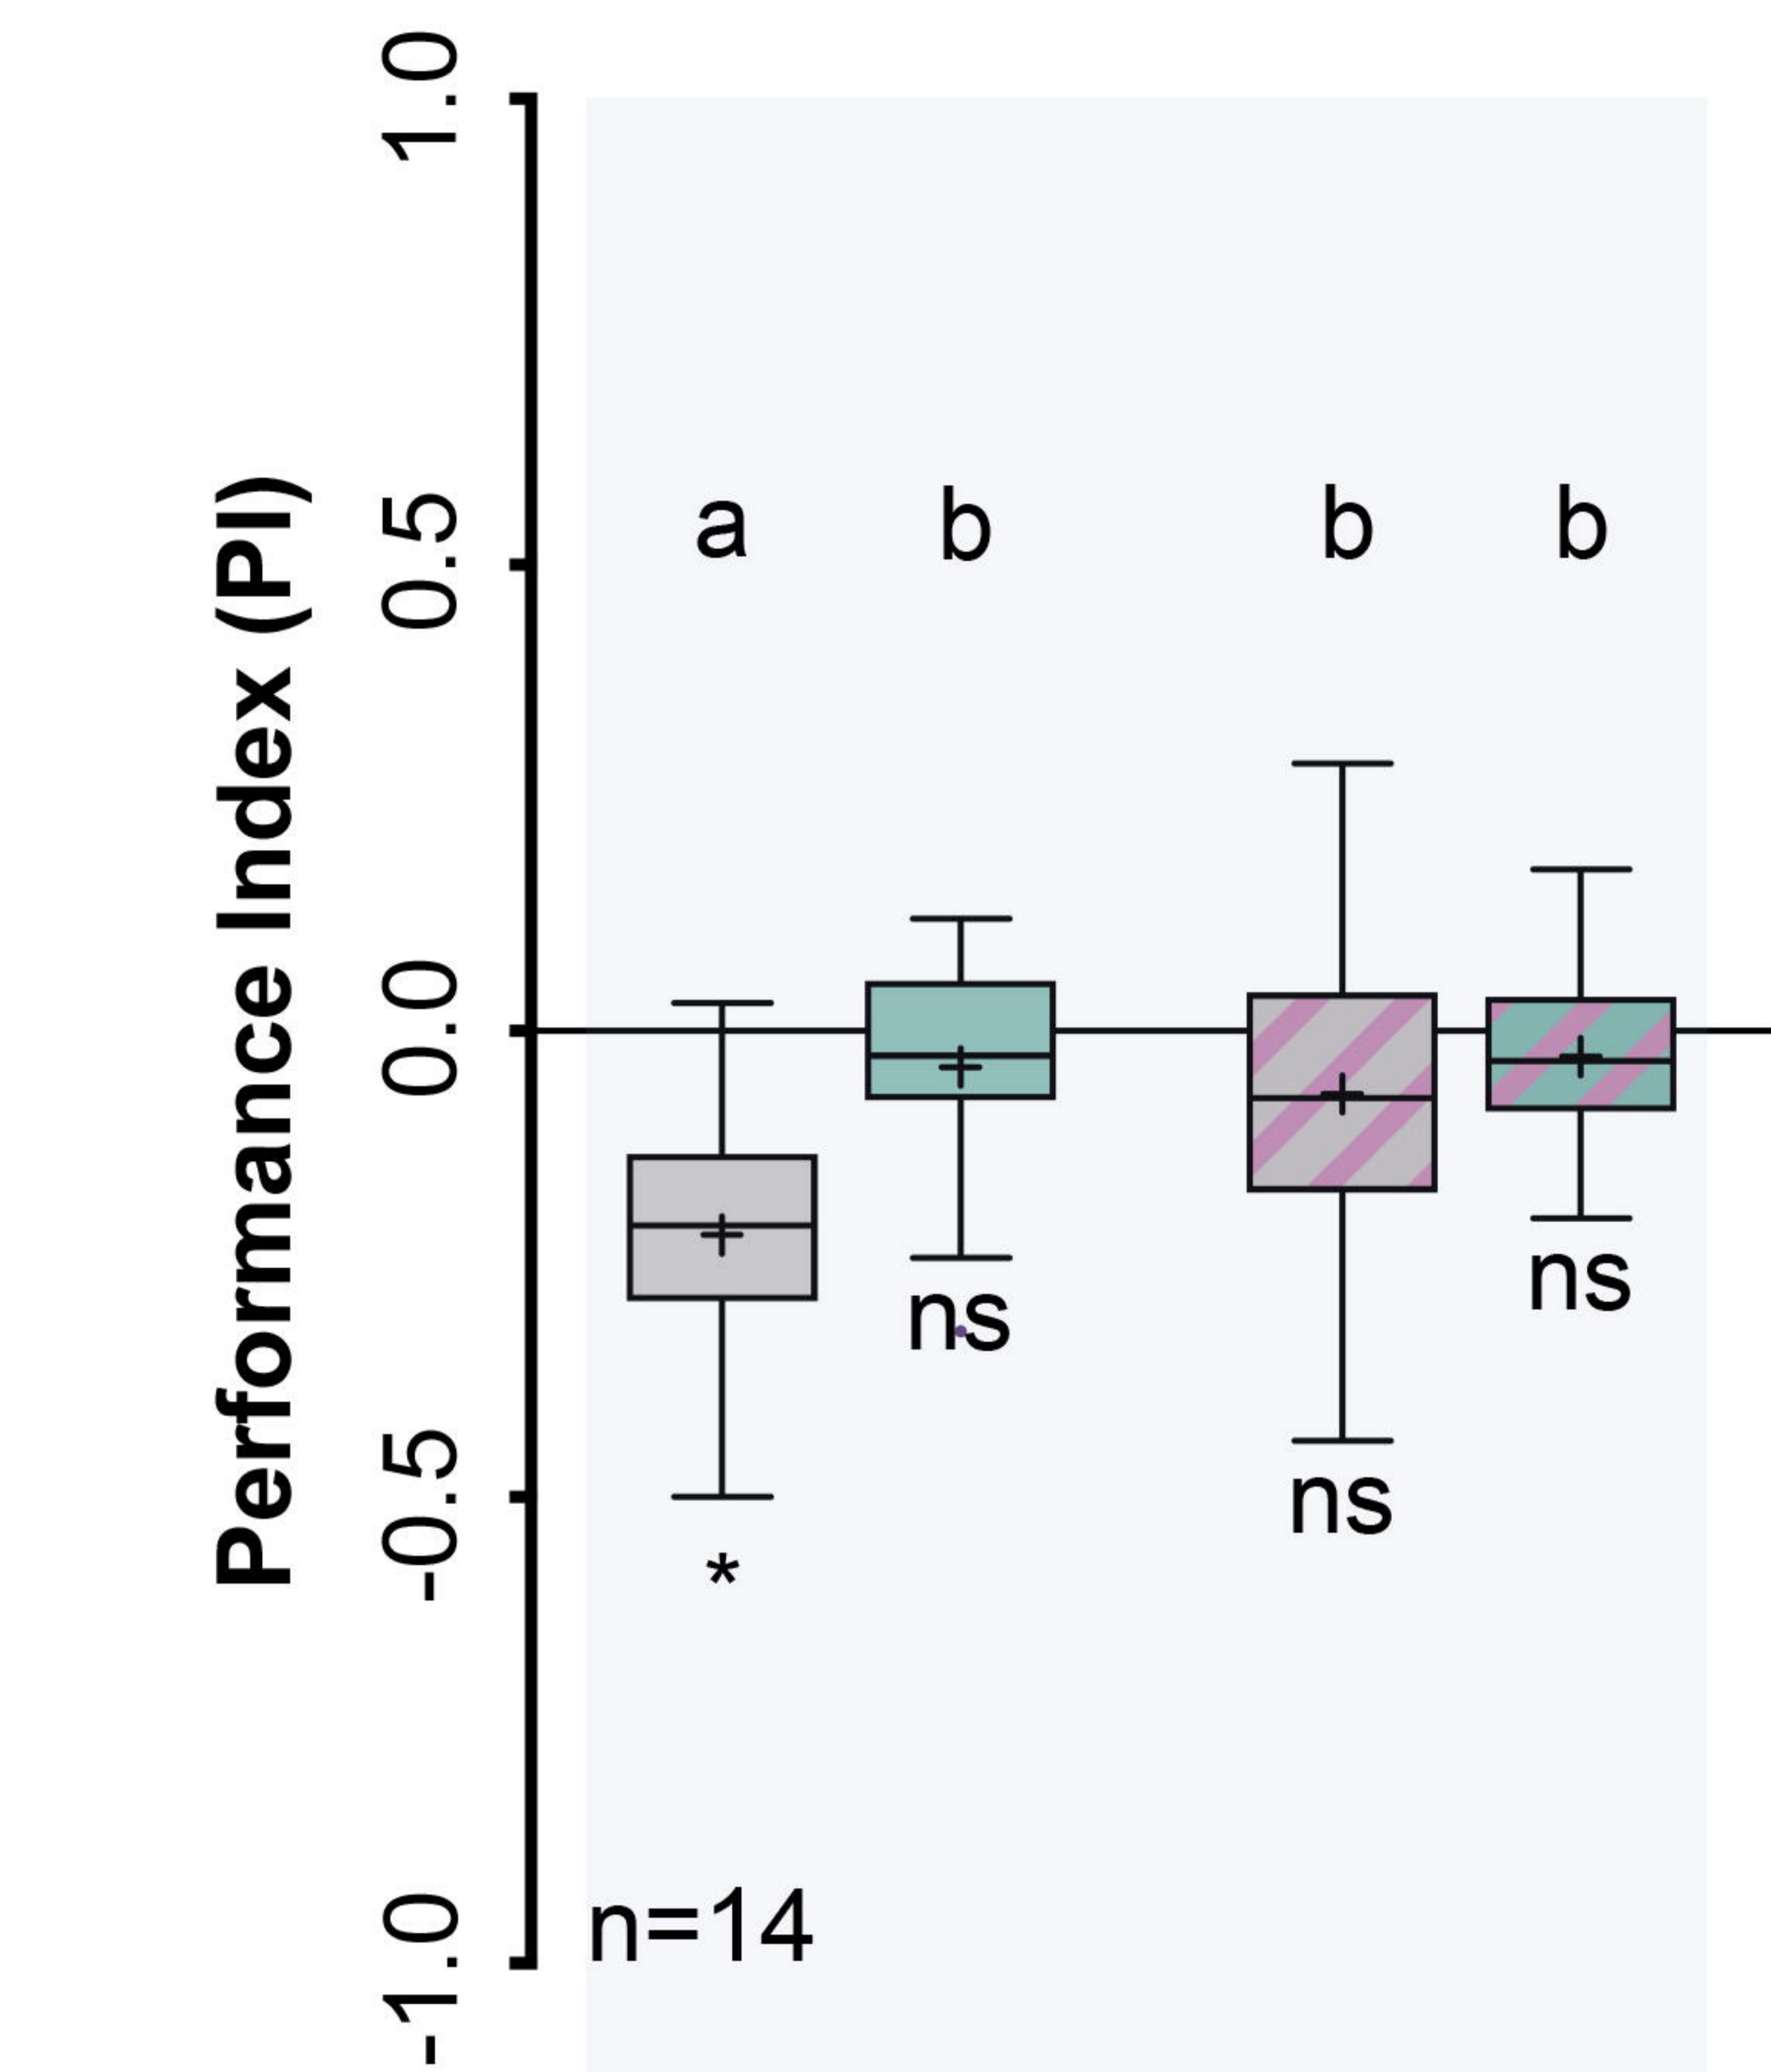

|                         |   |   |   |   |
|-------------------------|---|---|---|---|
| Sucrose                 | - | - | + | + |
| Cold shock              | + | + | + | + |
| <i>rsh</i> <sup>1</sup> | - | + | - | + |

**C**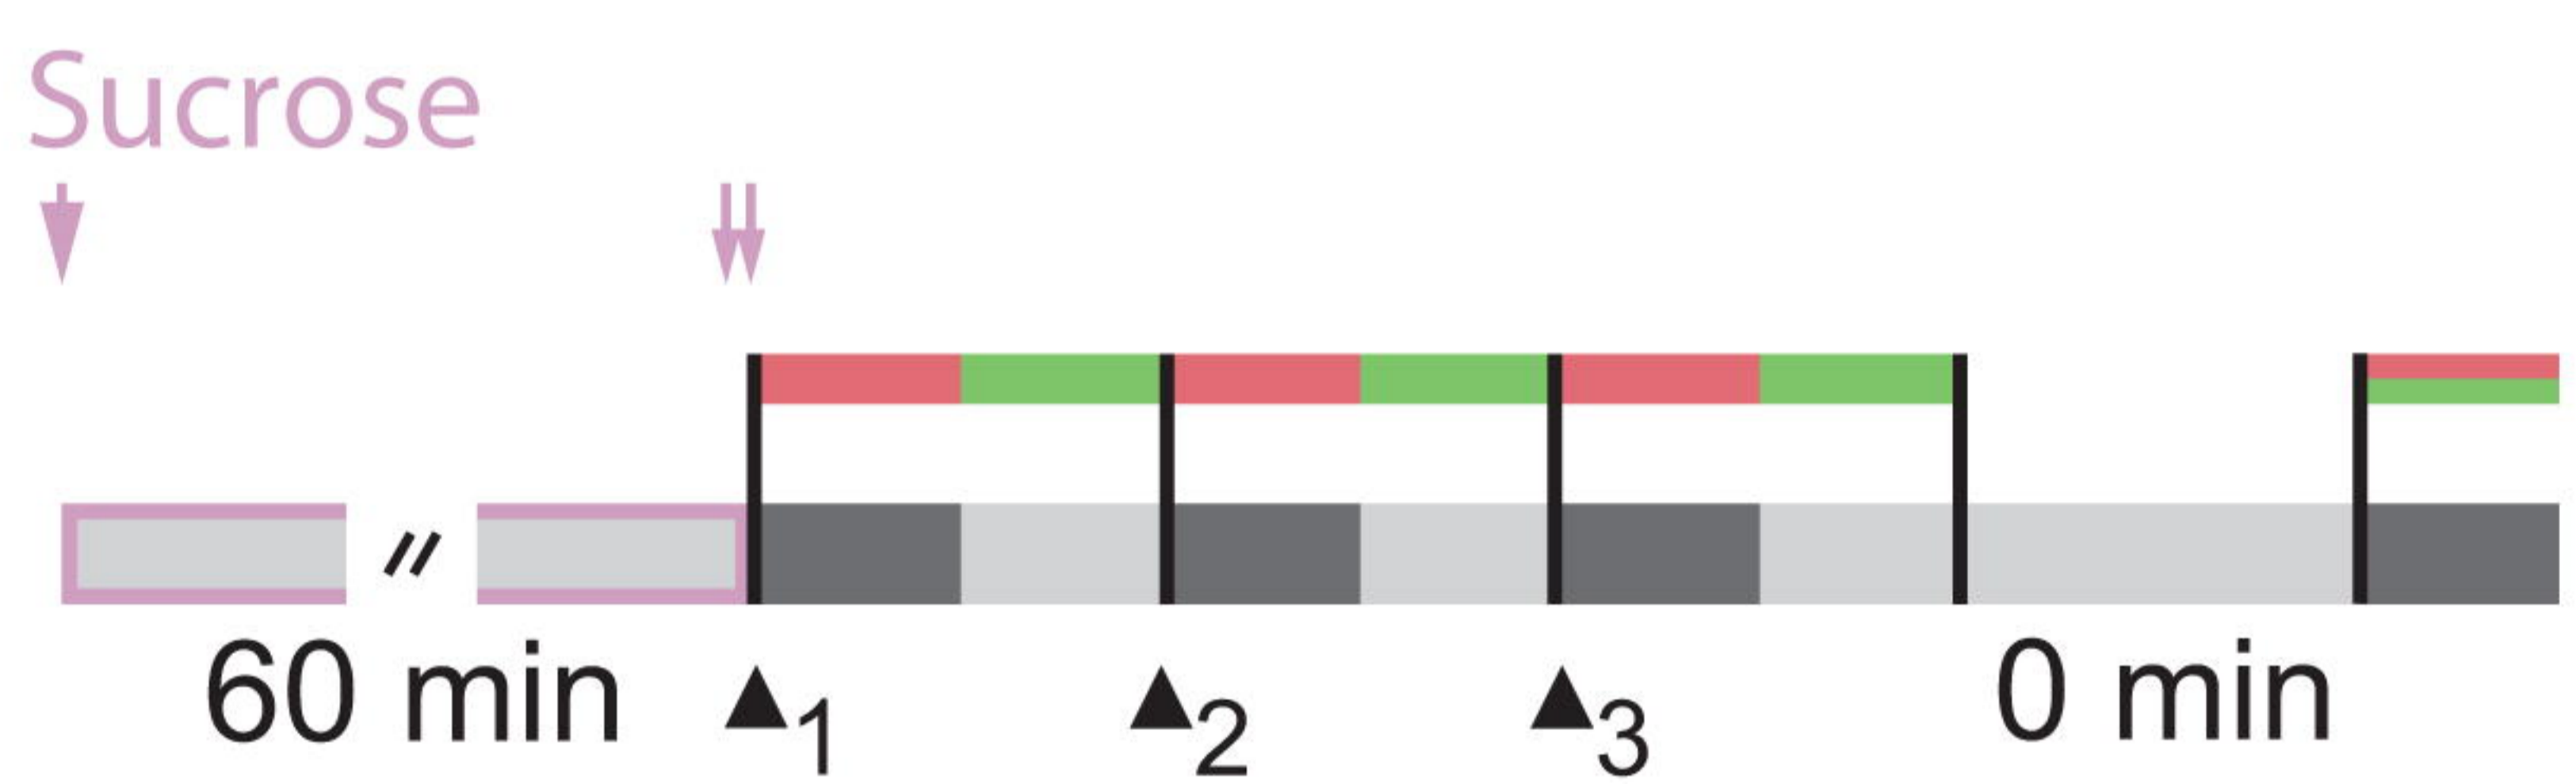**Memory @ 0 min****Sucrose 0.15 mol/l**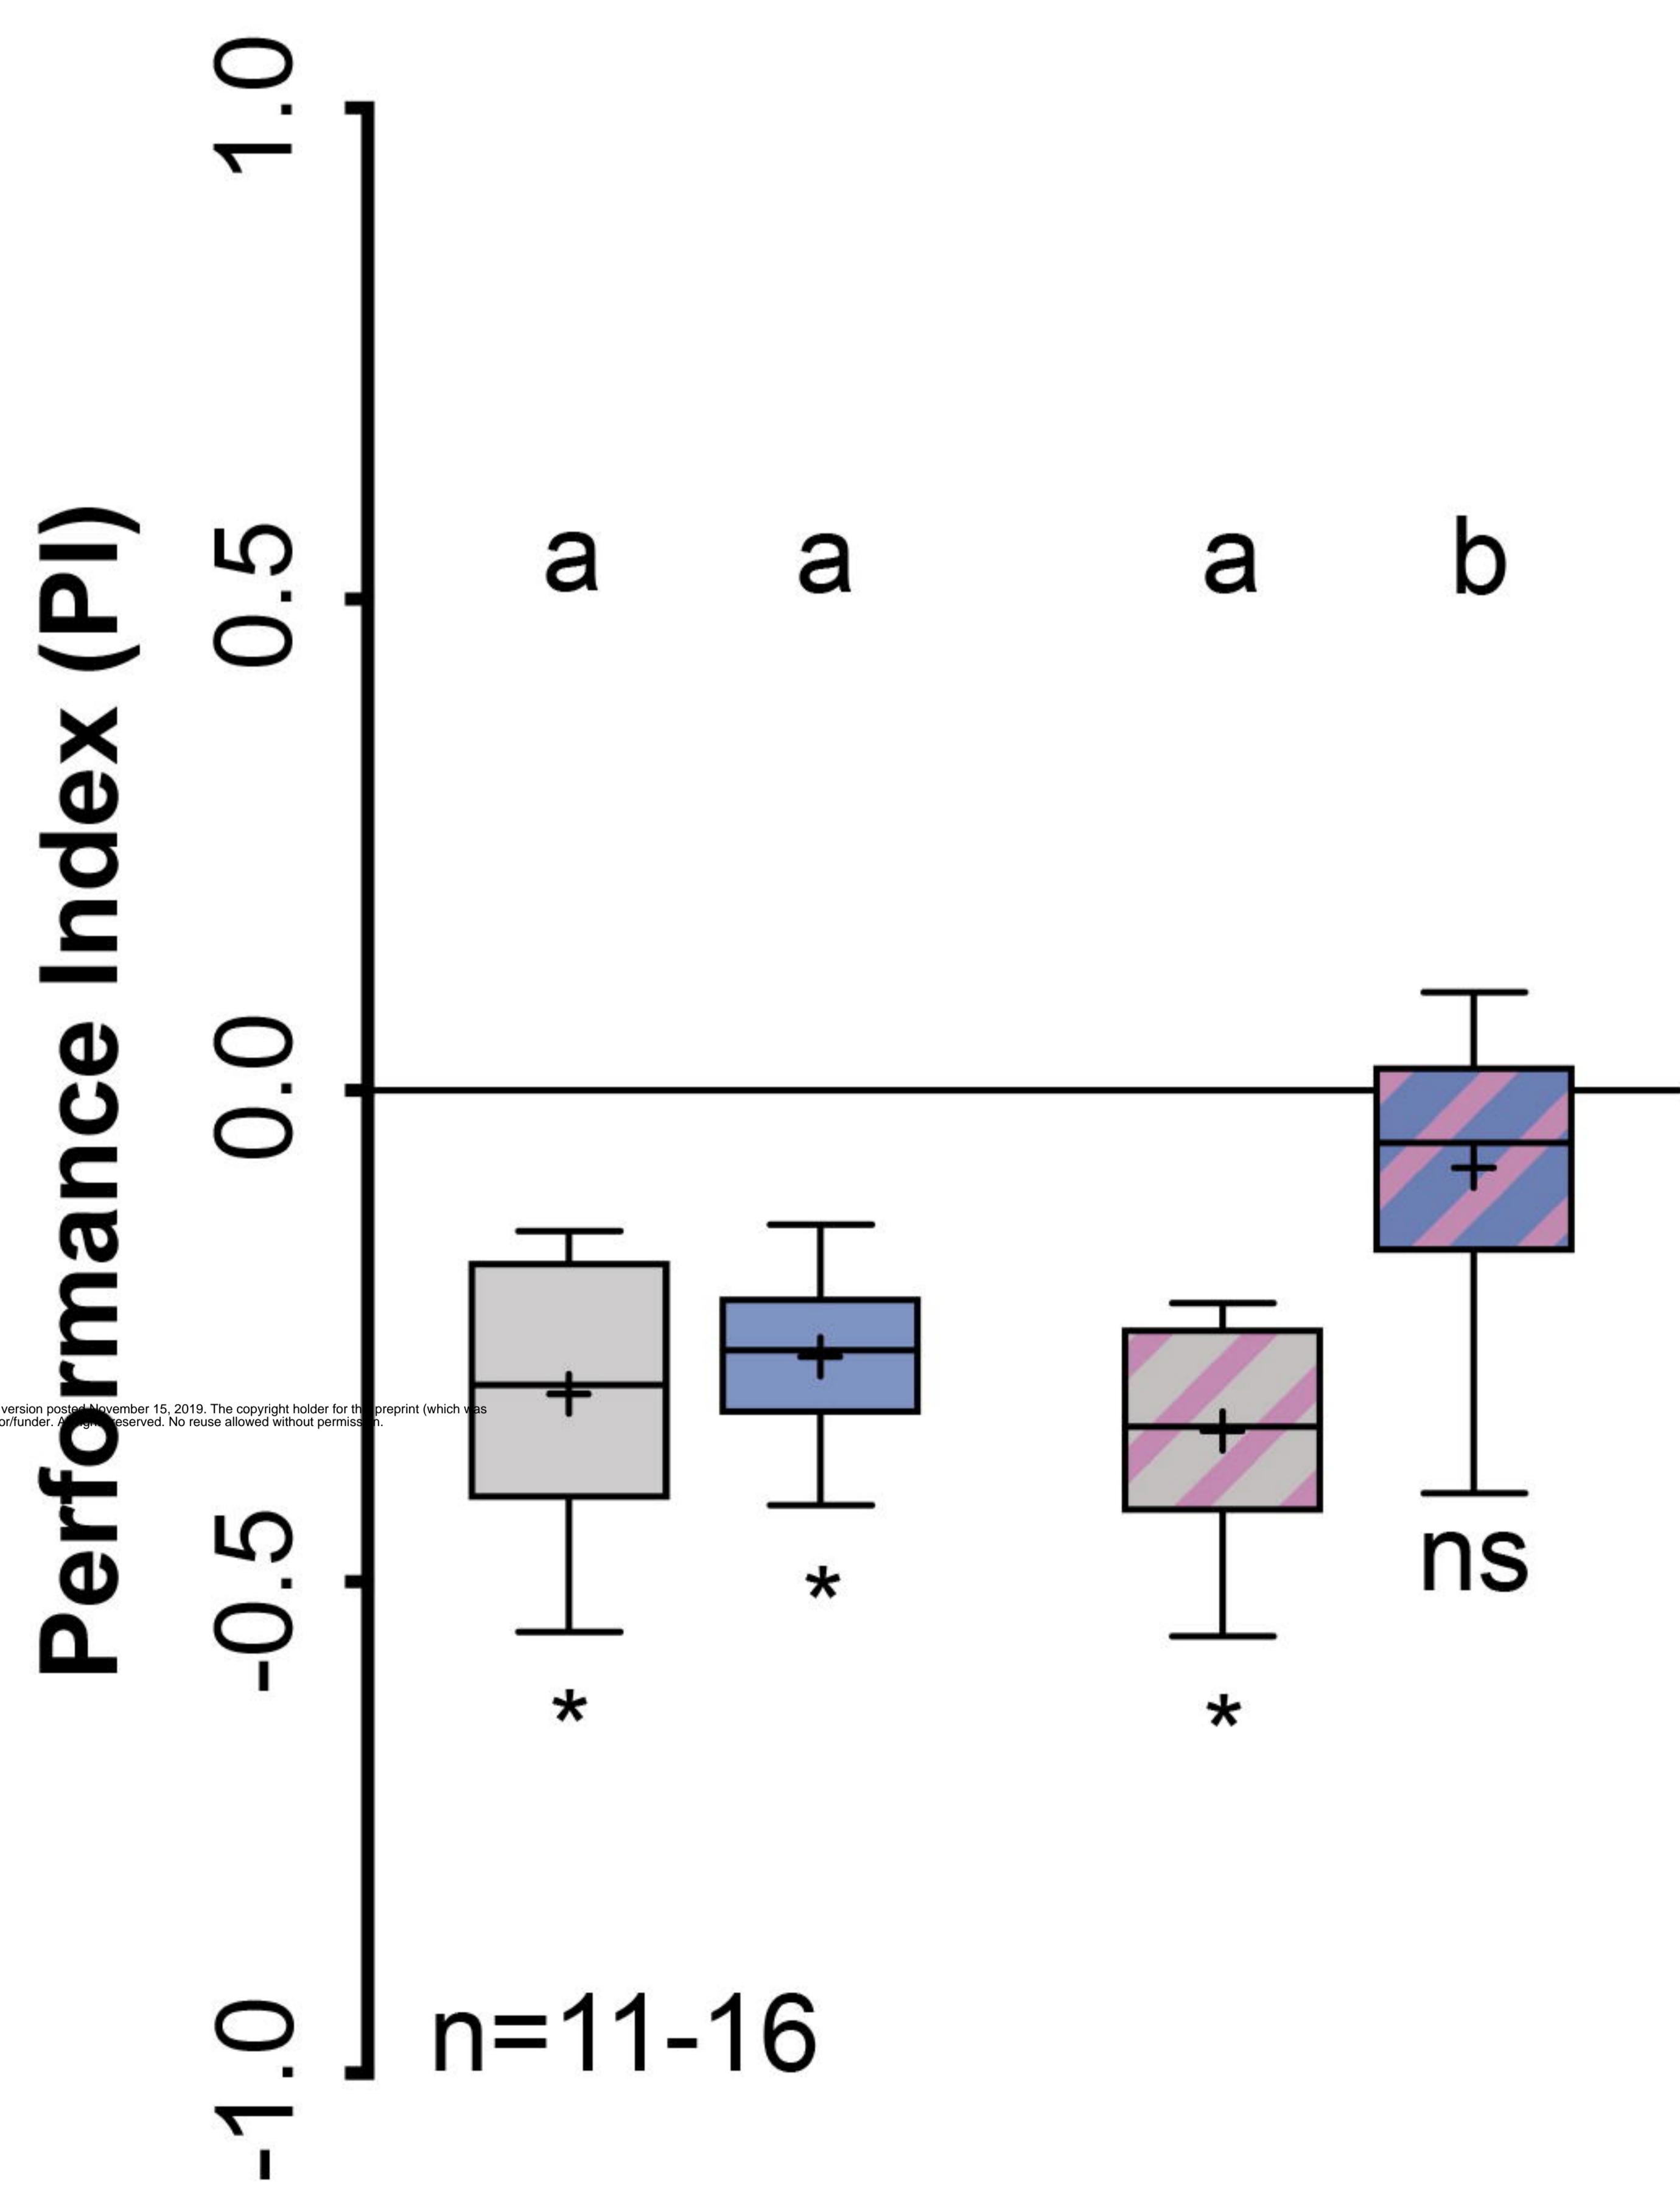

|                            |   |   |   |   |
|----------------------------|---|---|---|---|
| Sucrose                    | - | - | + | + |
| Cold shock                 | - | - | - | - |
| <i>rut</i> <sup>2080</sup> | - | + | - | + |

**A**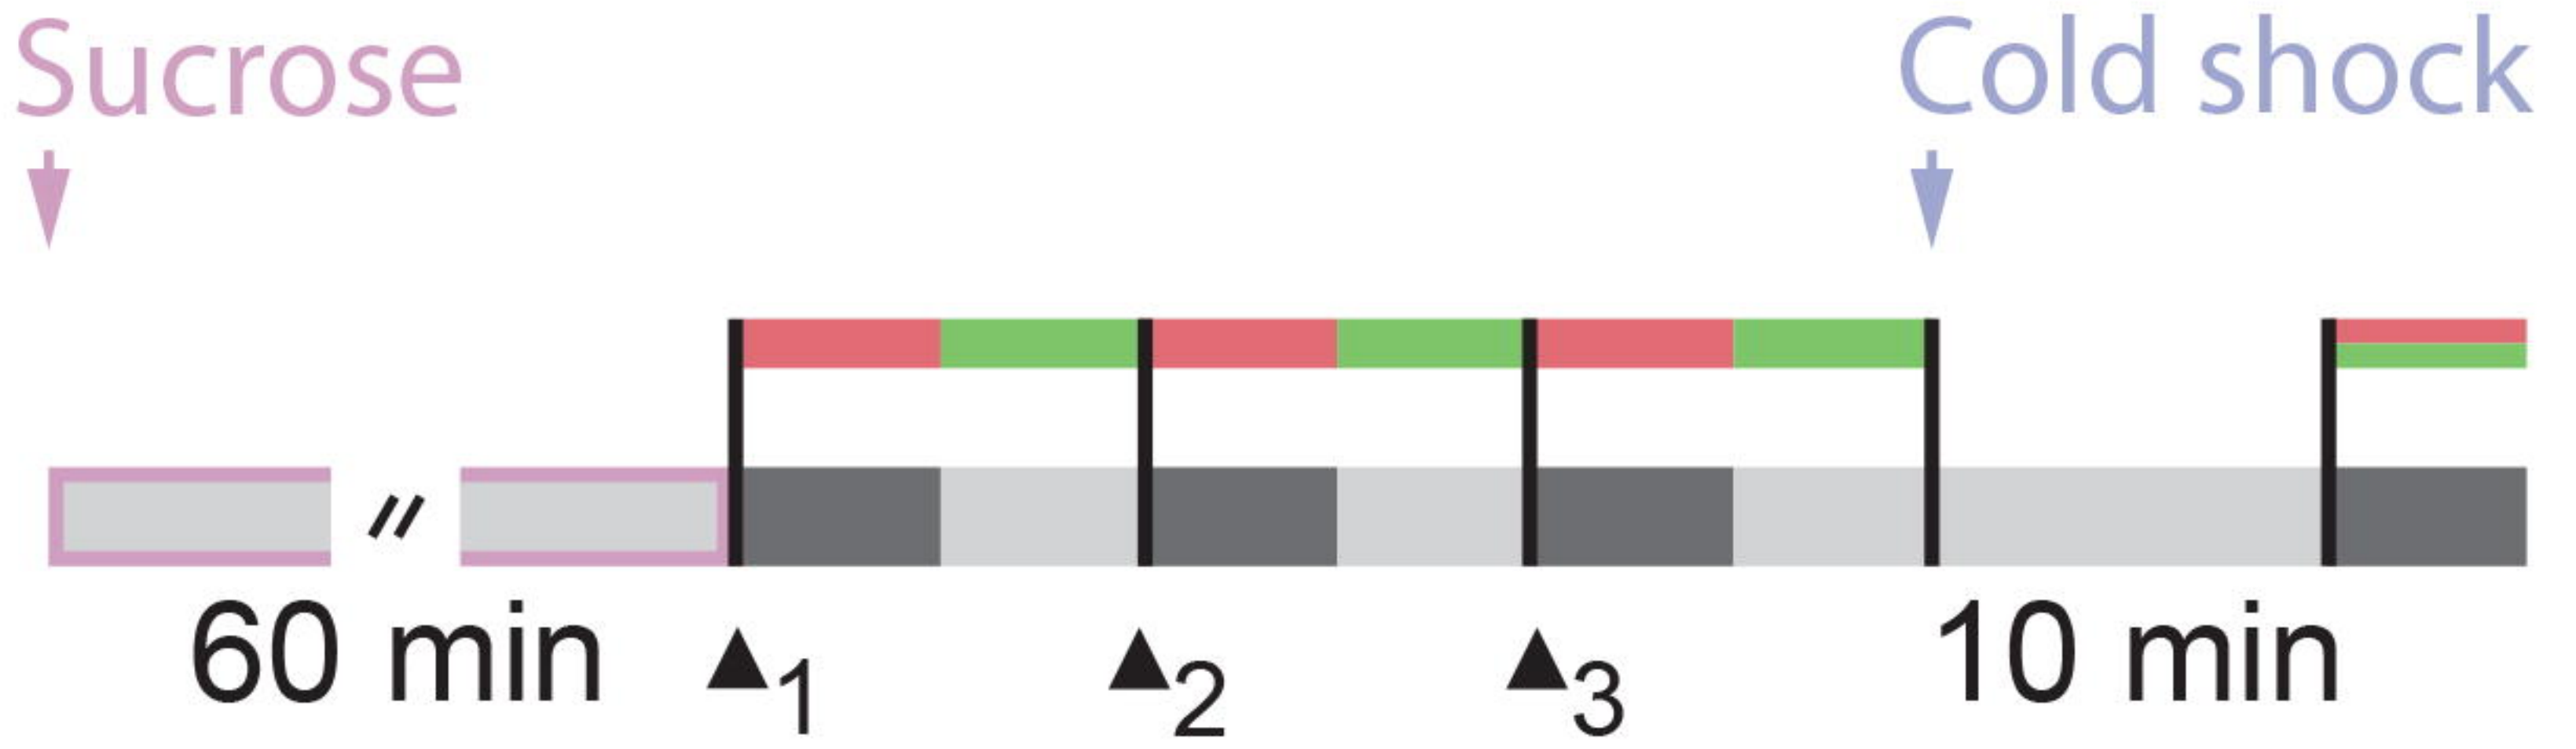

## Memory @ 10 min

Sucrose 0.15 mol/l  
Cold shock @ 0 min

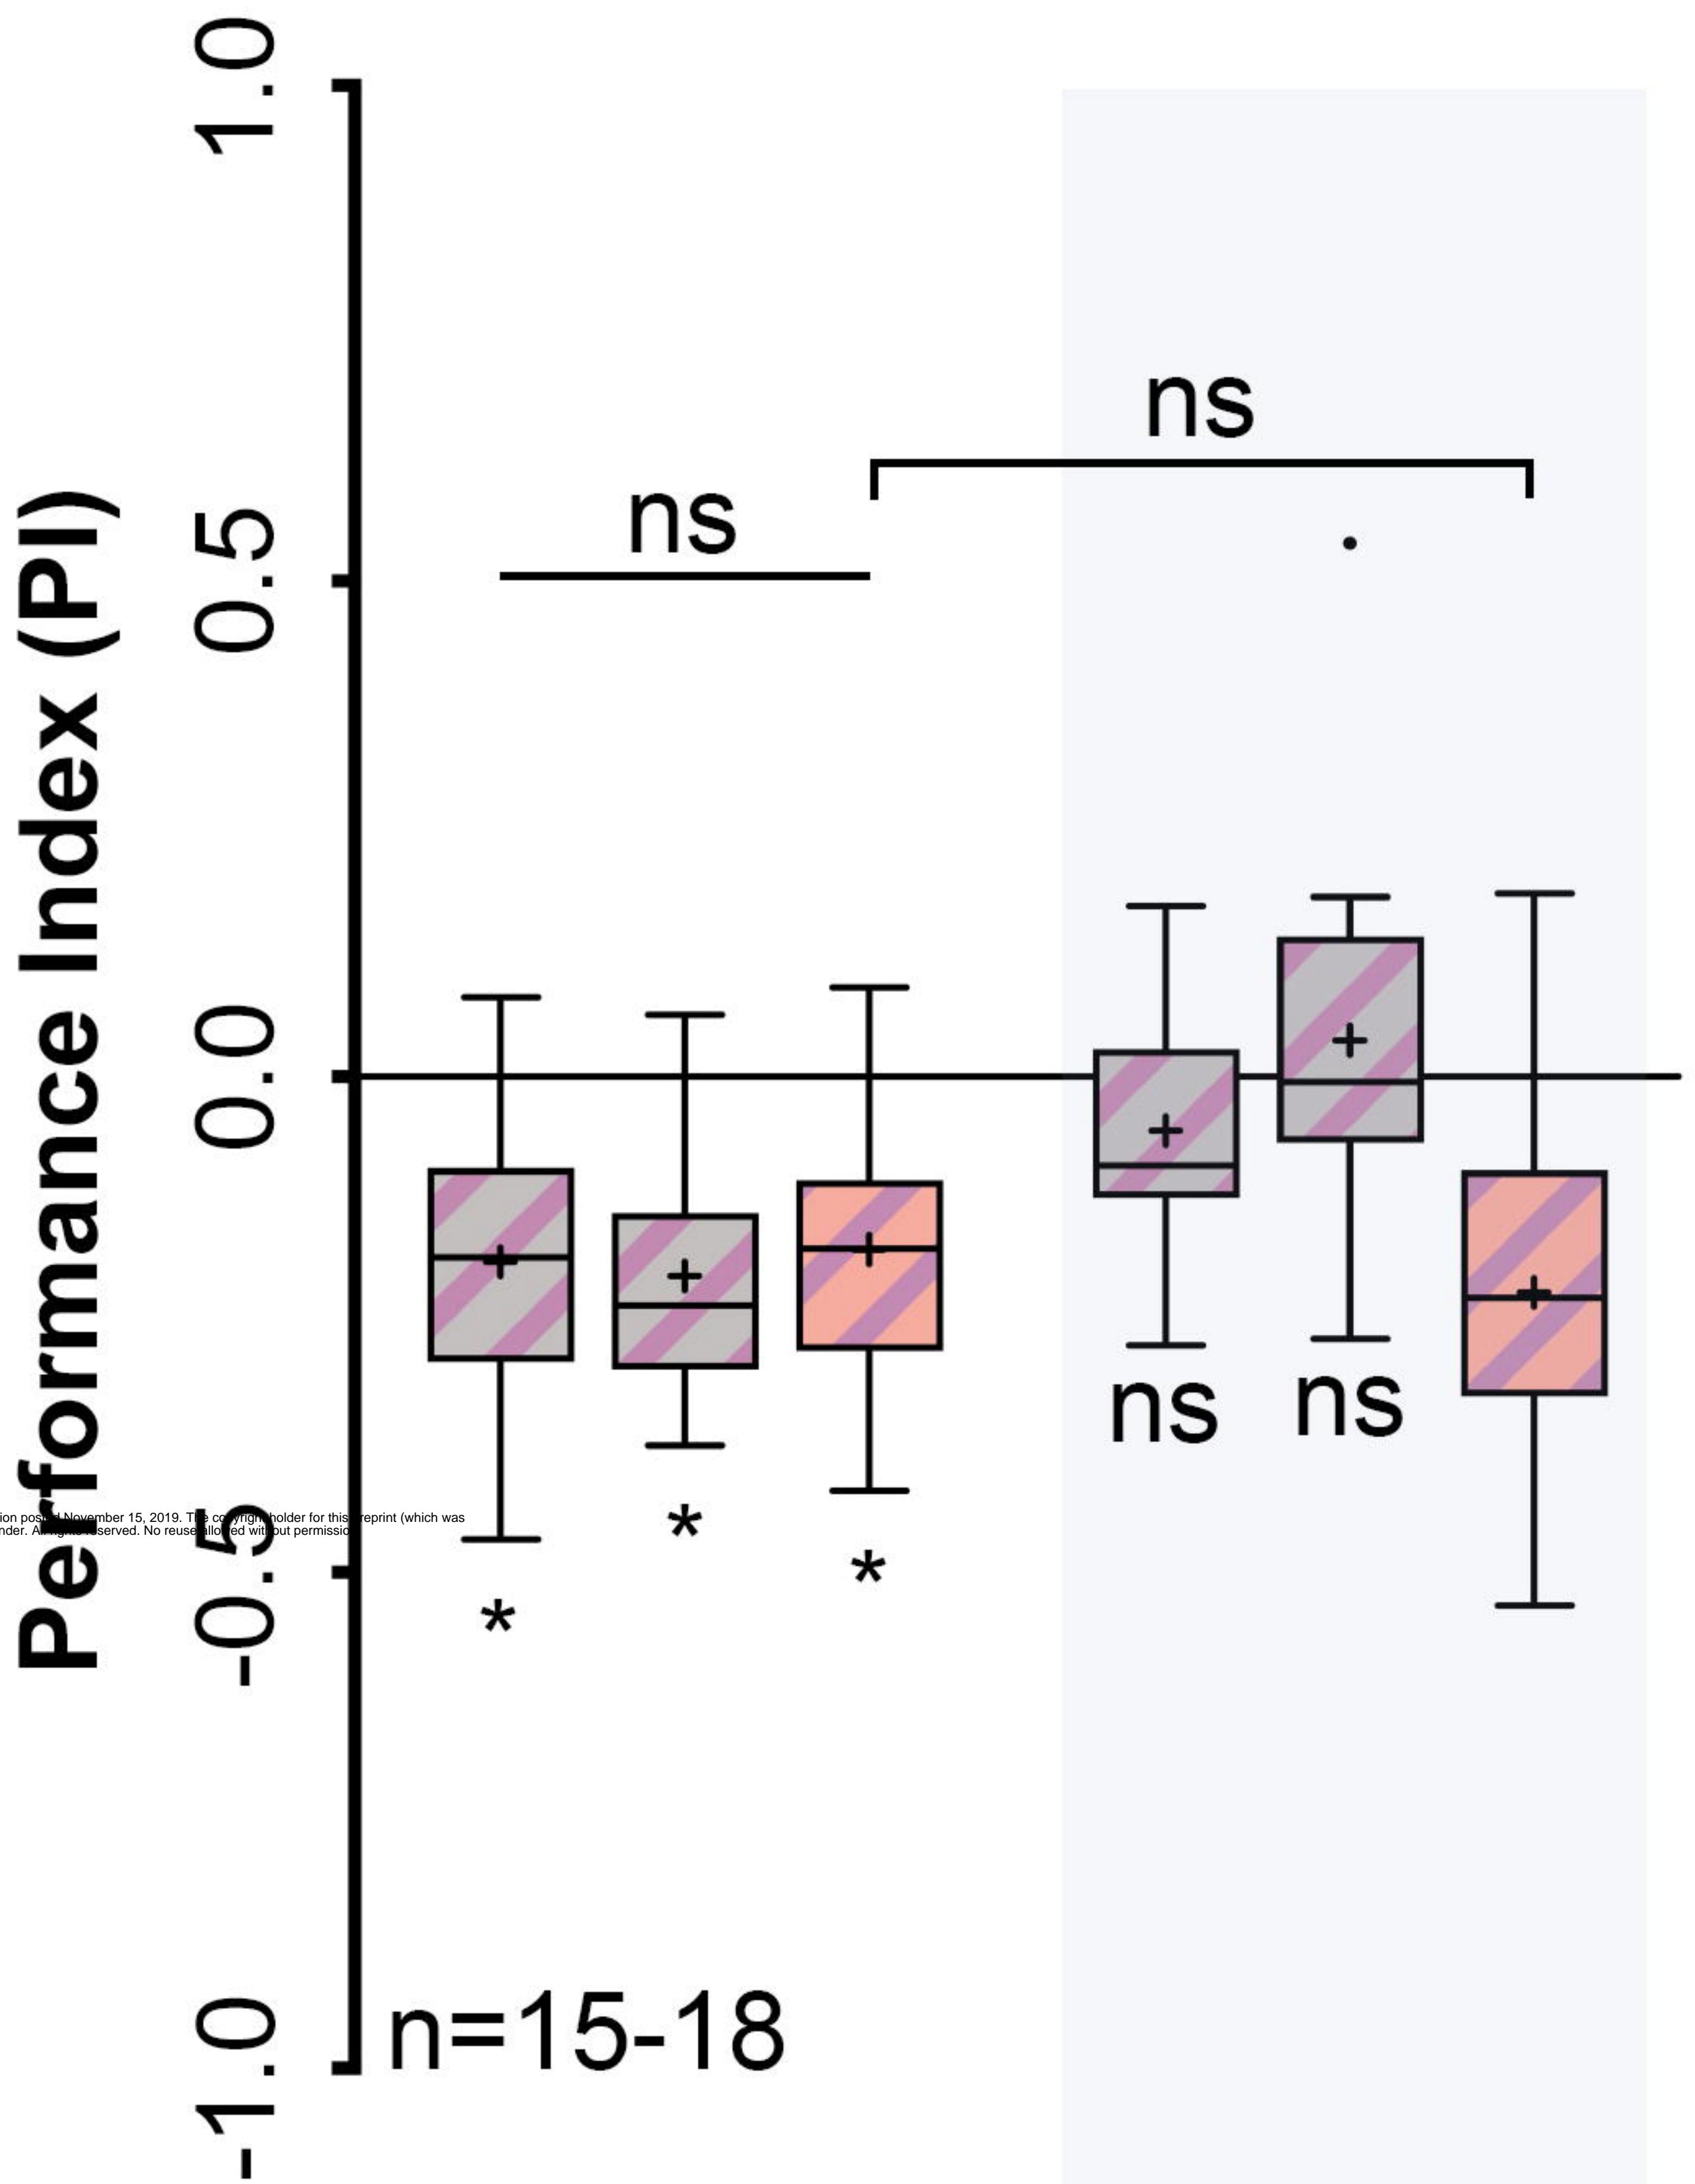

bioRxiv preprint doi: <https://doi.org/10.1101/842997>; this version posted November 15, 2019. The copyright holder for this preprint (which was not certified by peer review) is the author/funder. All rights reserved. No reuse allowed without permission.

|                             |   |   |   |   |   |   |
|-----------------------------|---|---|---|---|---|---|
| Sucrose                     | + | + | + | + | + | + |
| Cold shock                  | - | - | - | + | + | + |
| OK107                       | + | - | + | + | - | + |
| <i>UAS-InR<sup>DN</sup></i> | - | + | + | - | + | + |

**A**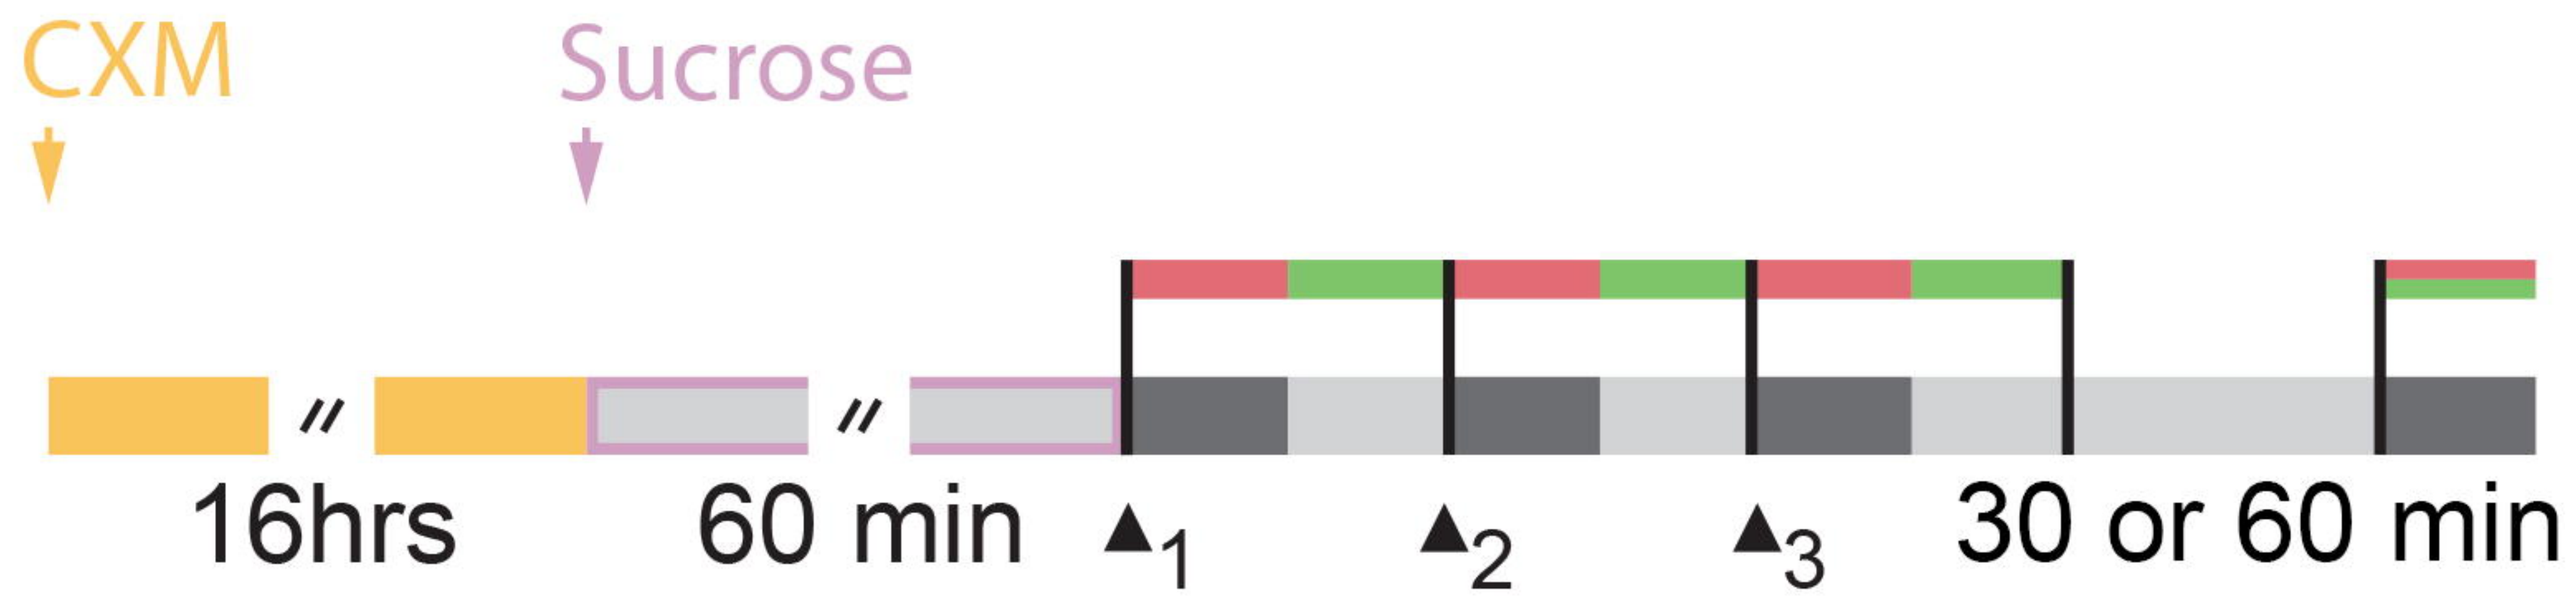**B****Memory @ 30 min**

Sucrose 0.15 mol/l  
Cycloheximide 35 mmol/l

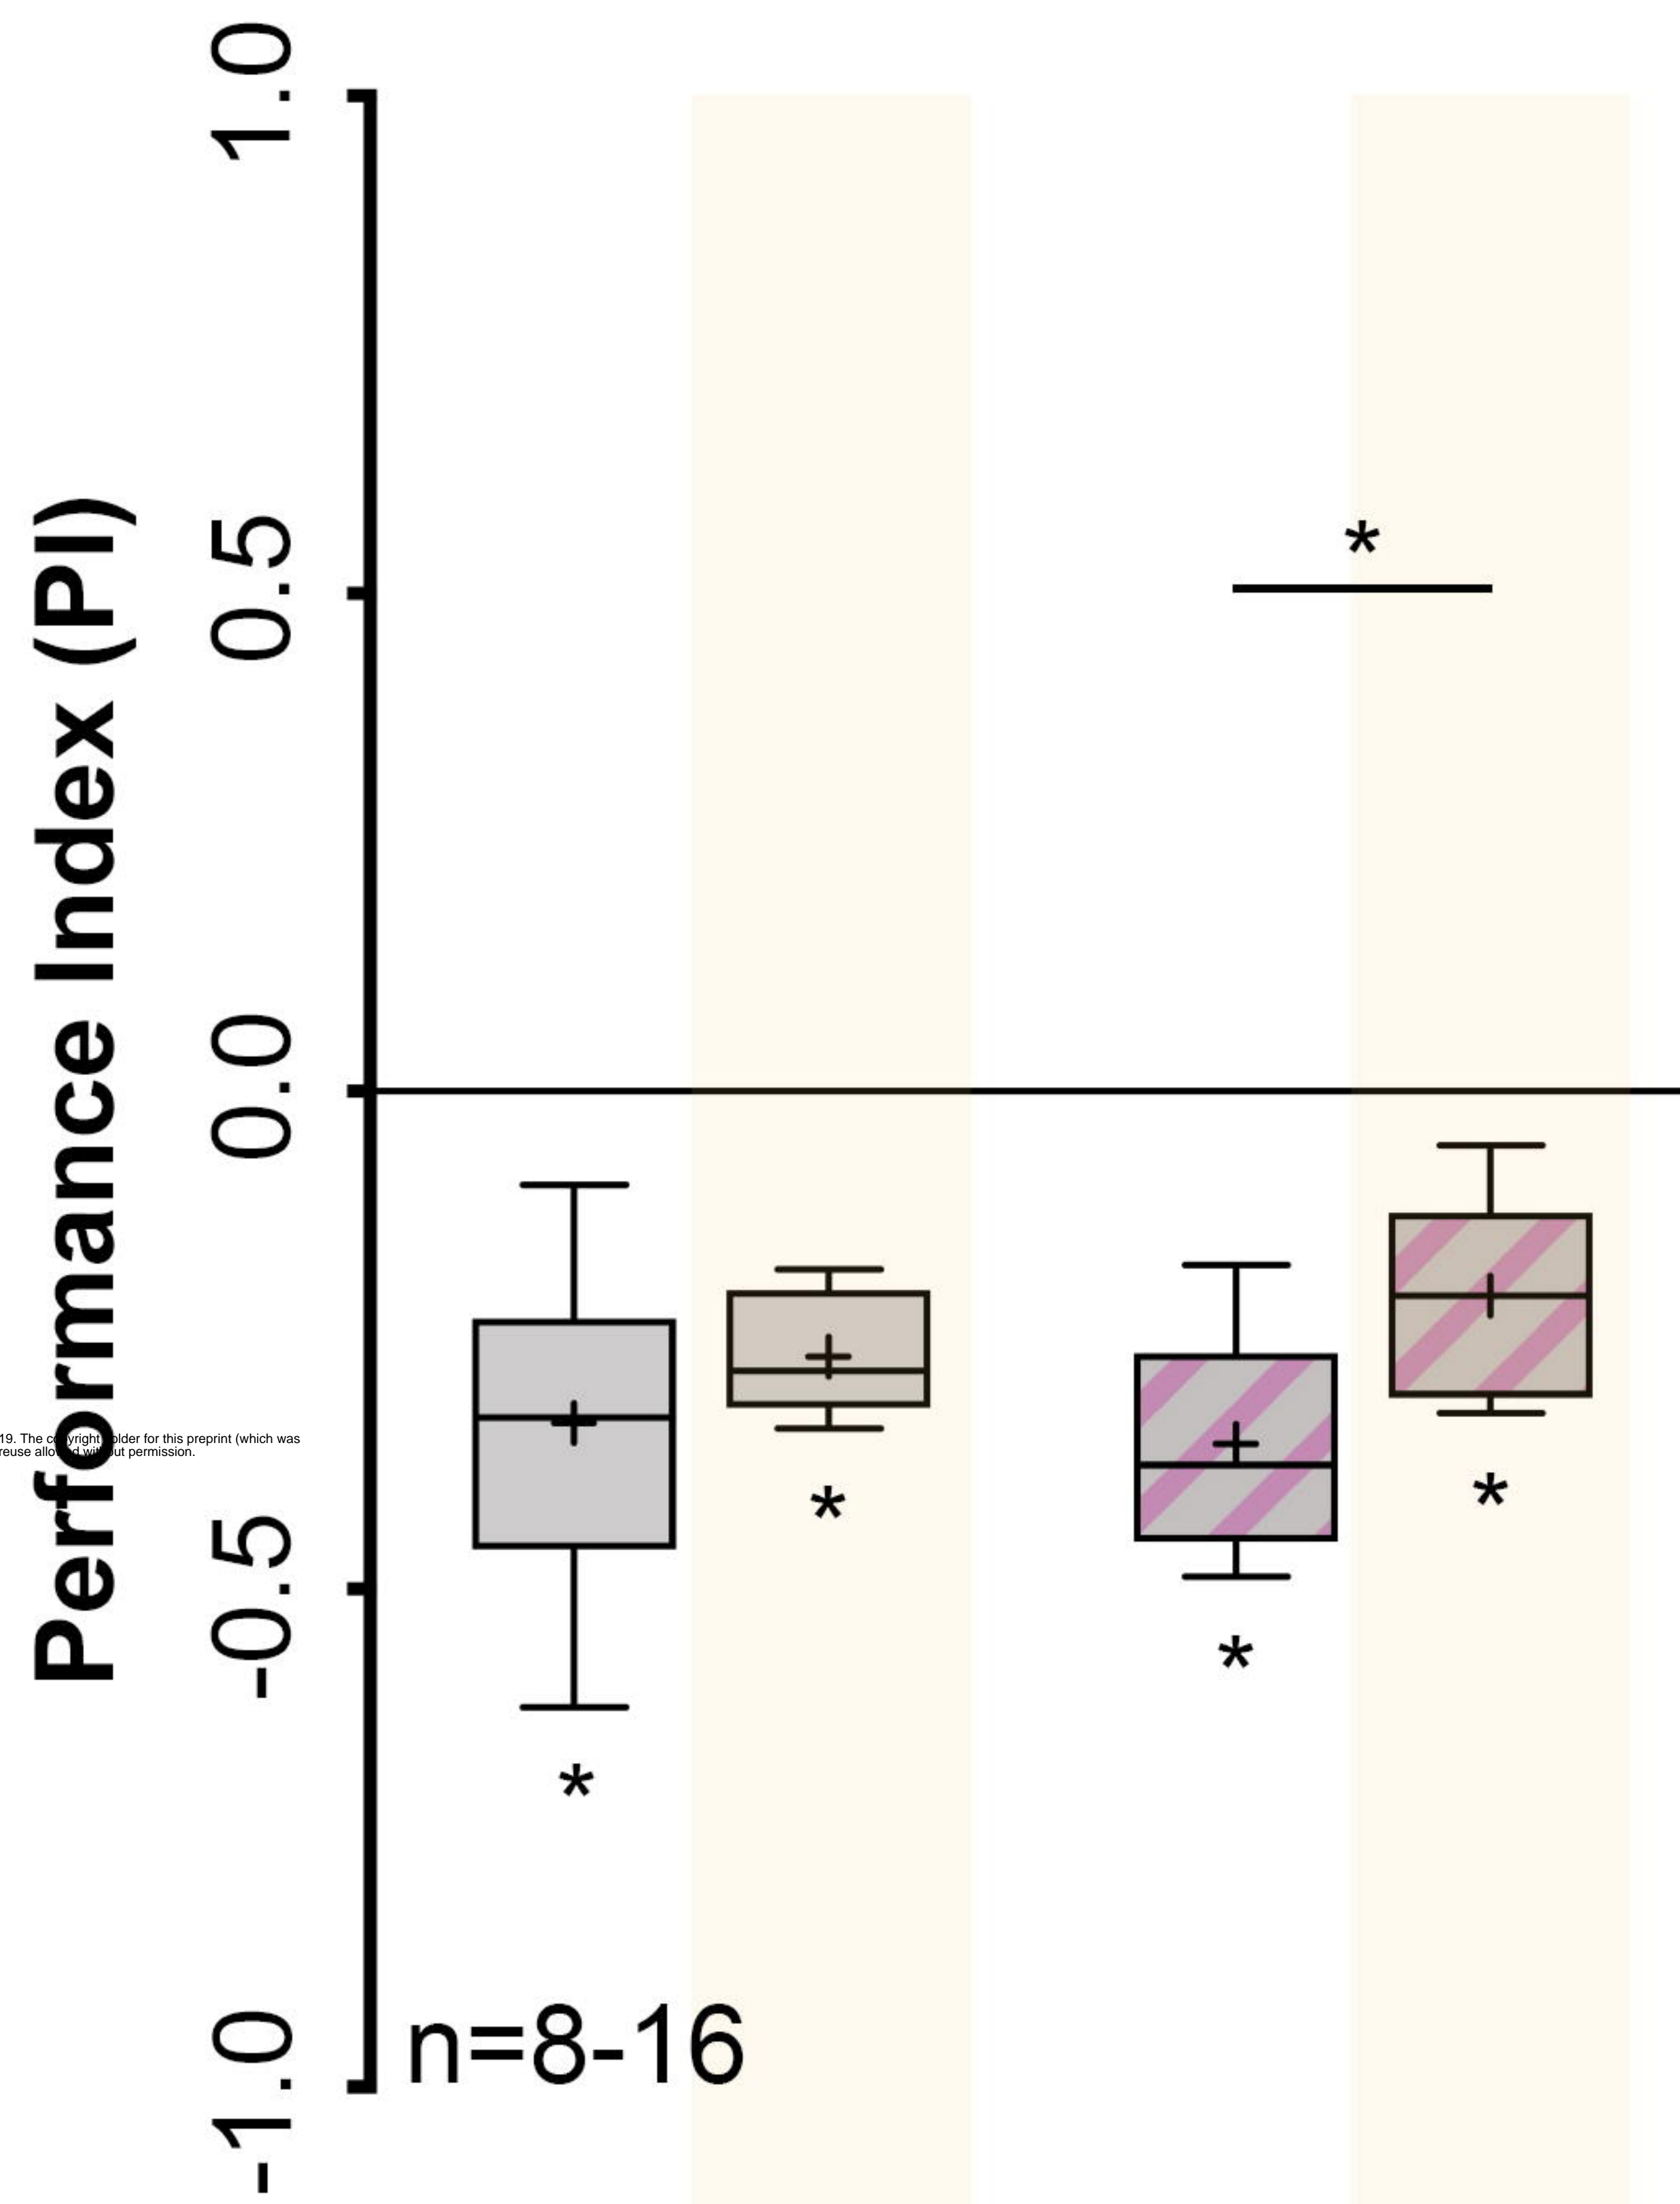**Memory @ 60 min**

Sucrose 0.15 mol/l  
Cycloheximide 35 mmol/l

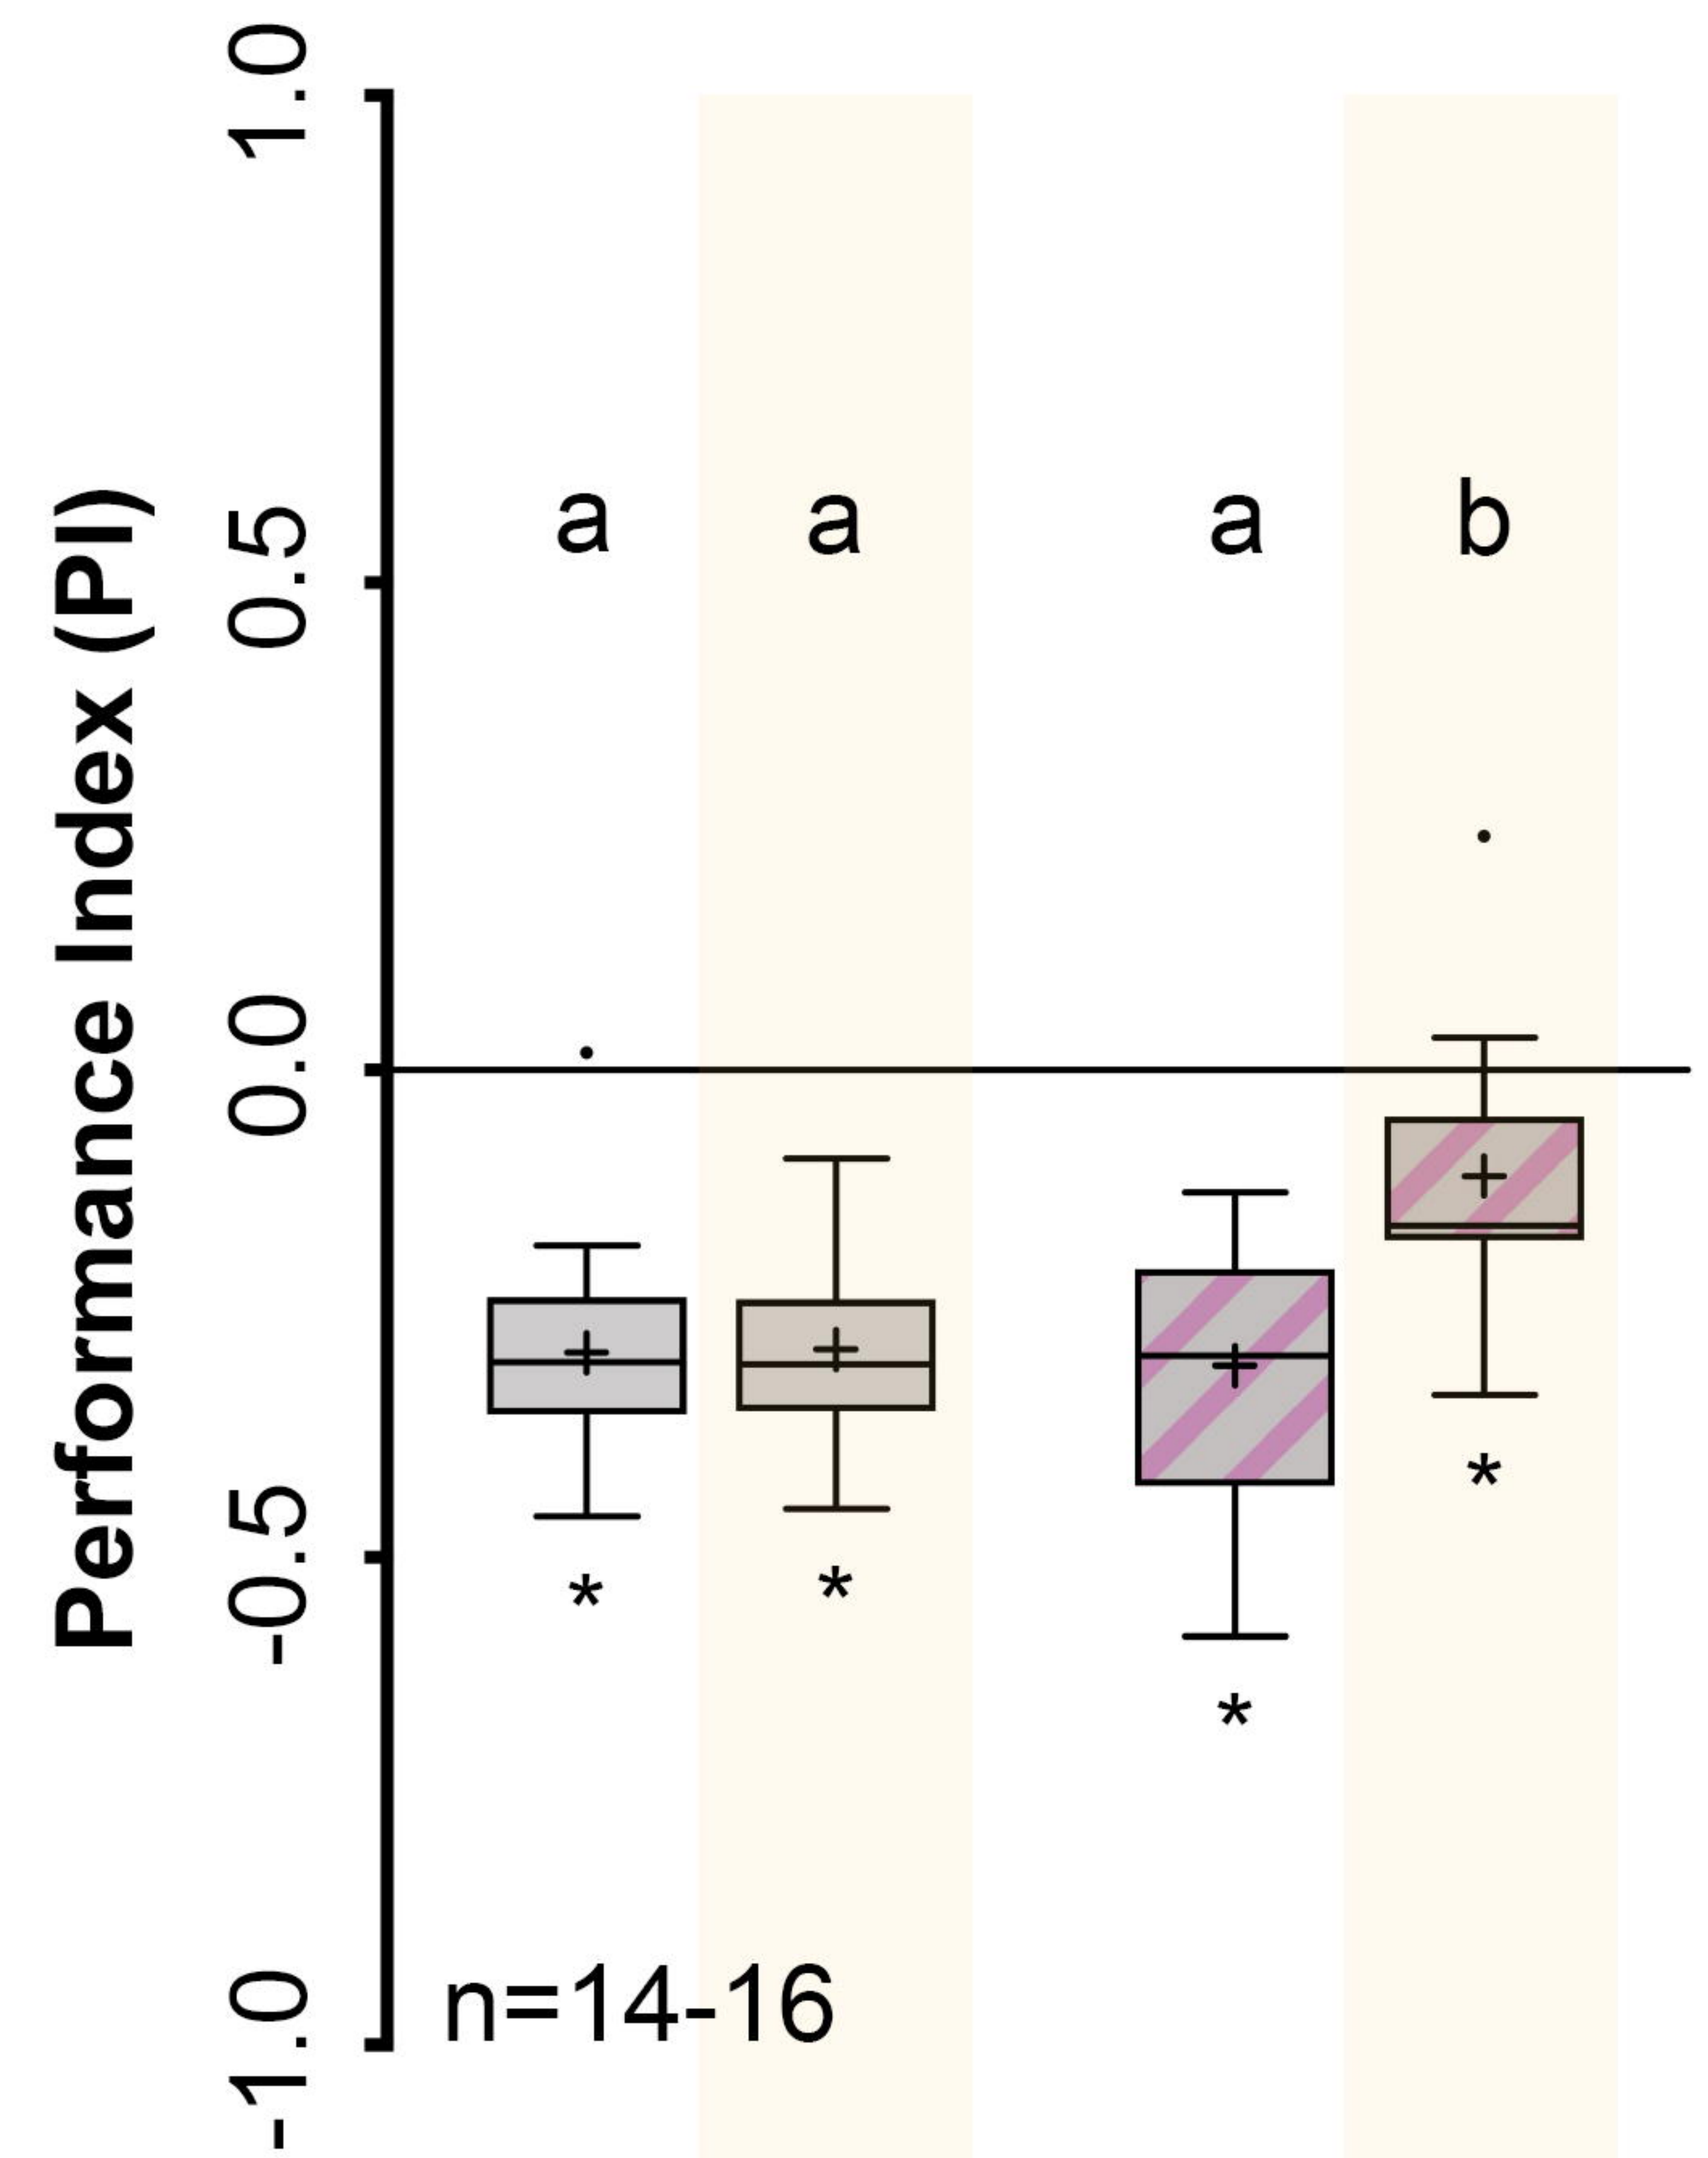

|               |   |   |   |   |
|---------------|---|---|---|---|
| Sucrose       | - | - | + | + |
| Cold shock    | - | - | - | - |
| Cycloheximide | - | + | - | + |

|               |   |   |   |   |
|---------------|---|---|---|---|
| Sucrose       | - | - | + | + |
| Cold shock    | - | - | - | - |
| Cycloheximide | - | + | - | + |

# A Normal energetic state

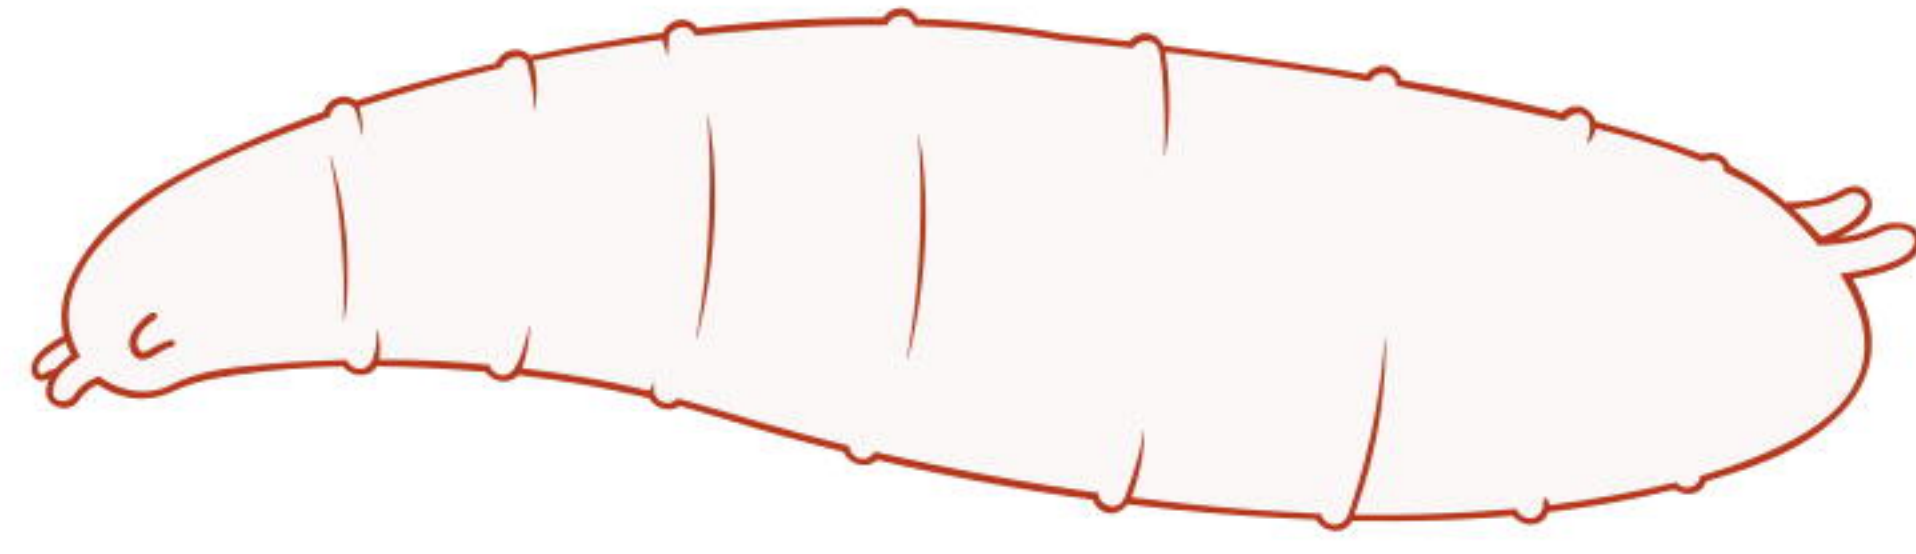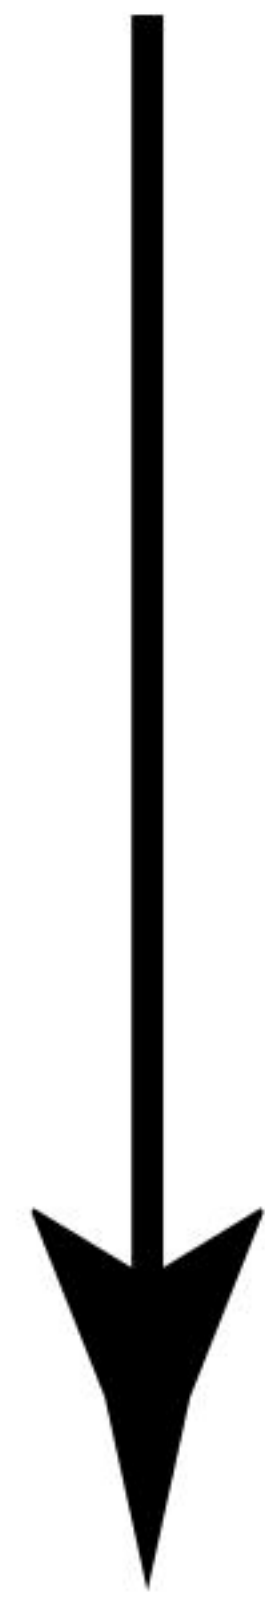

- SUC  
- InR

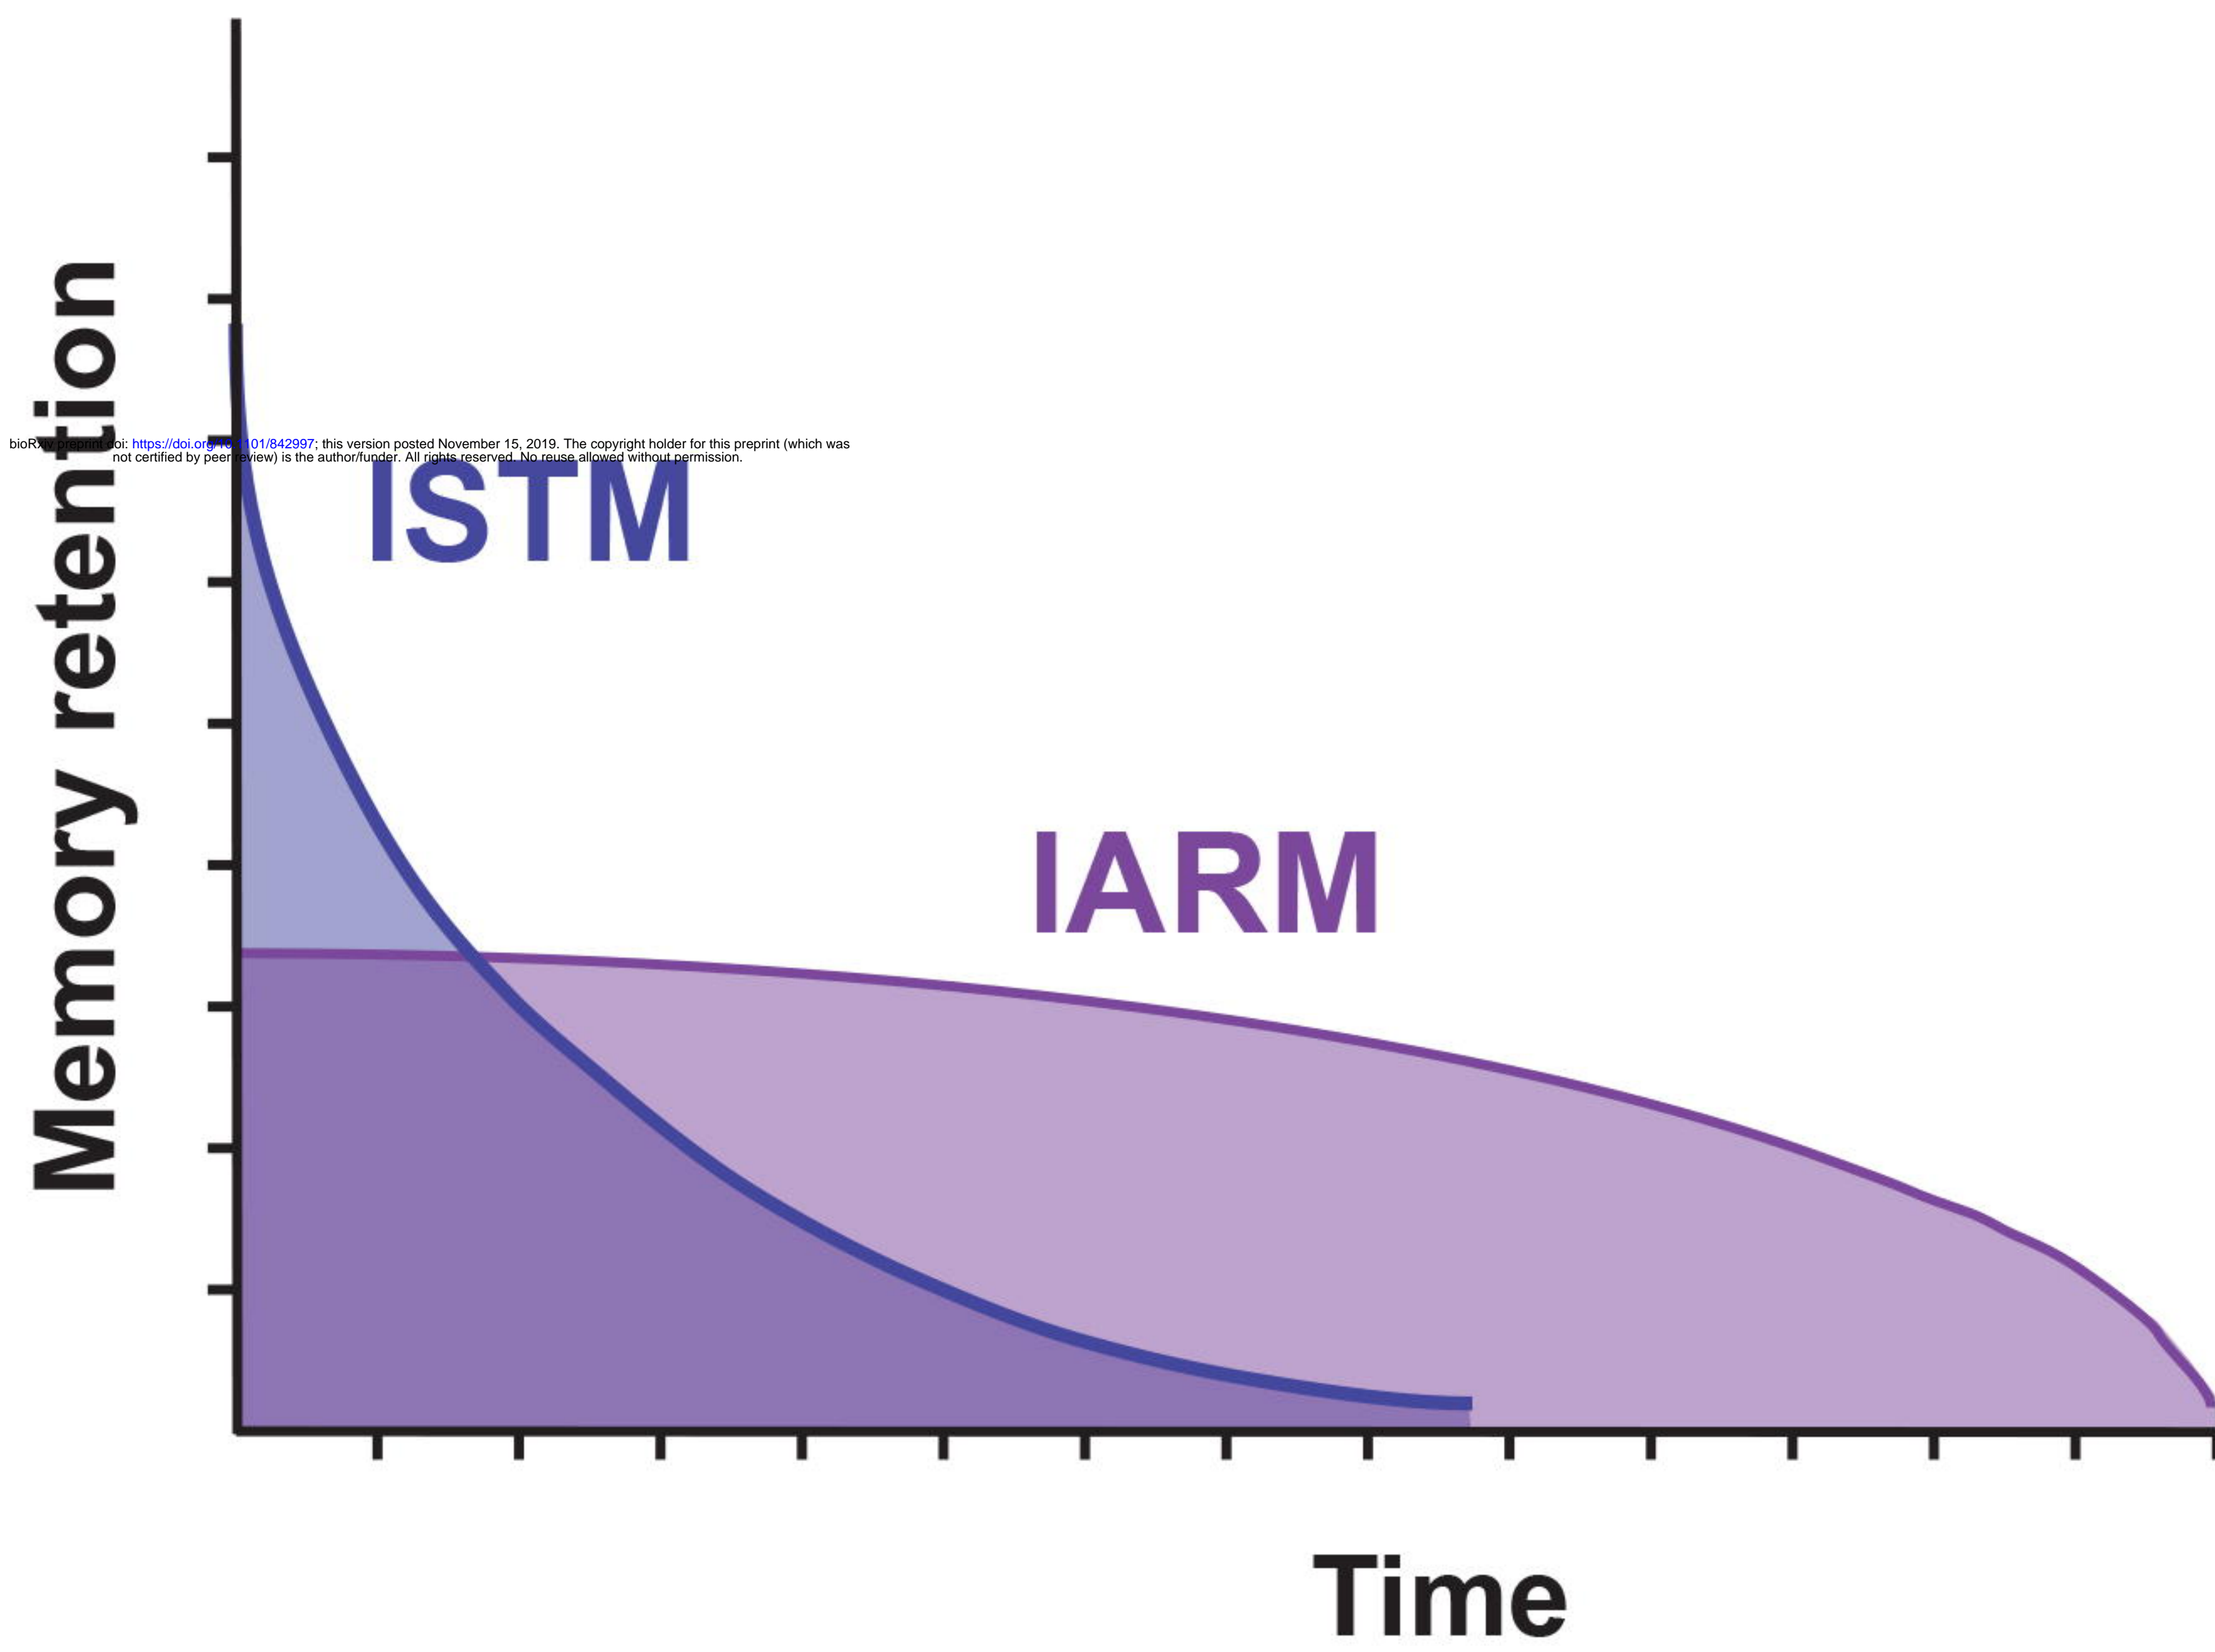

# B High energetic state

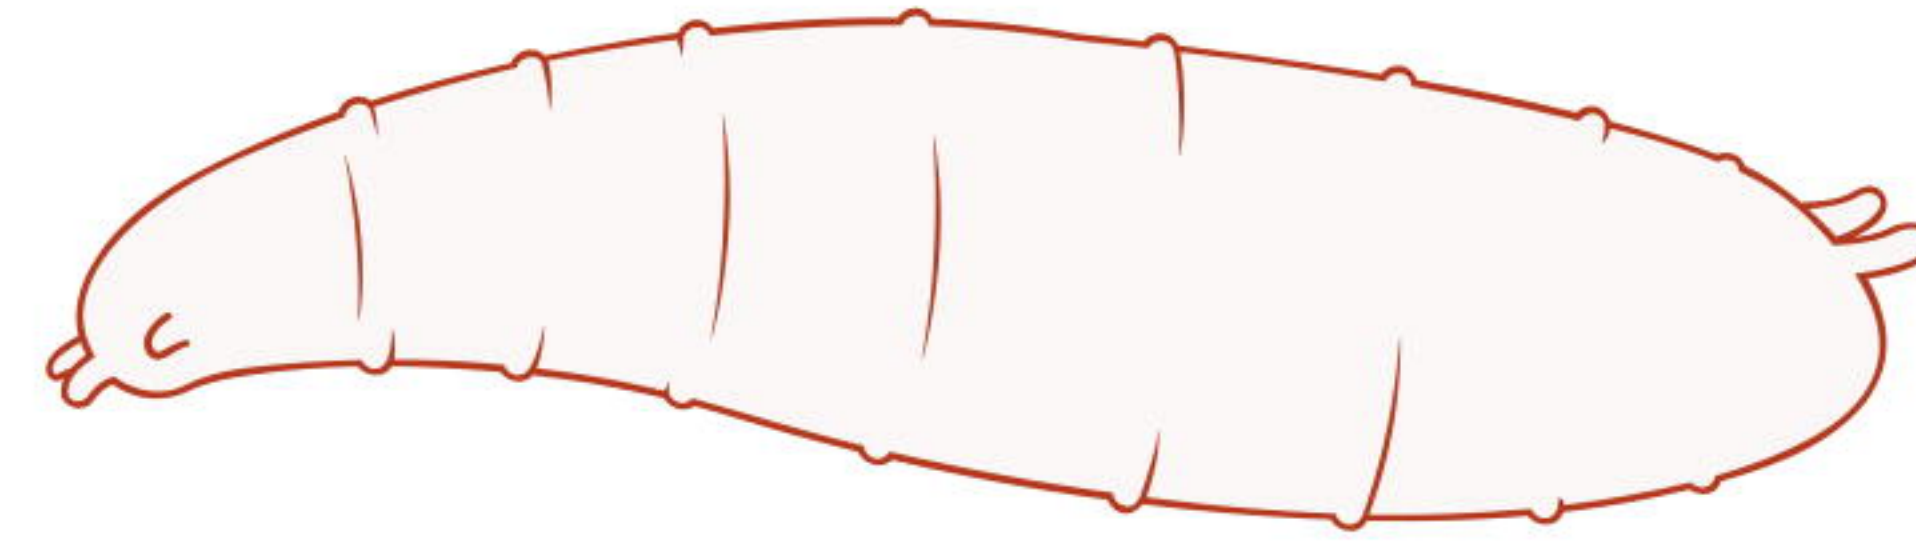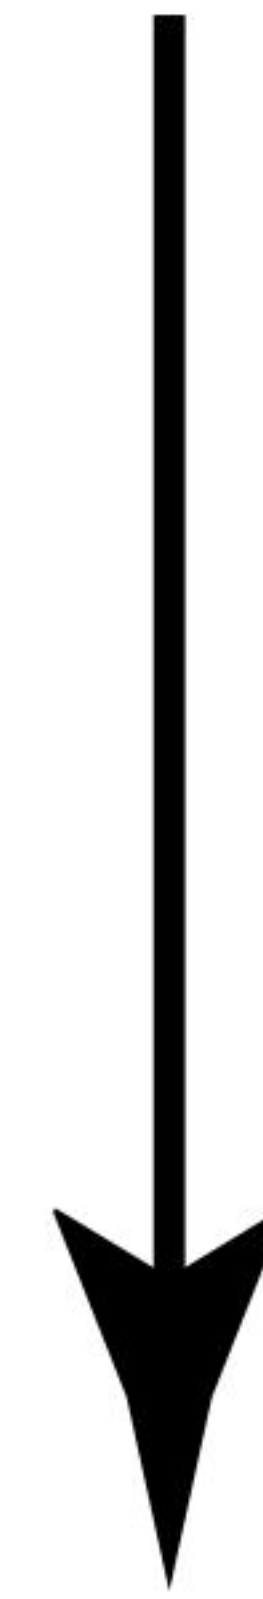

SUC + InR

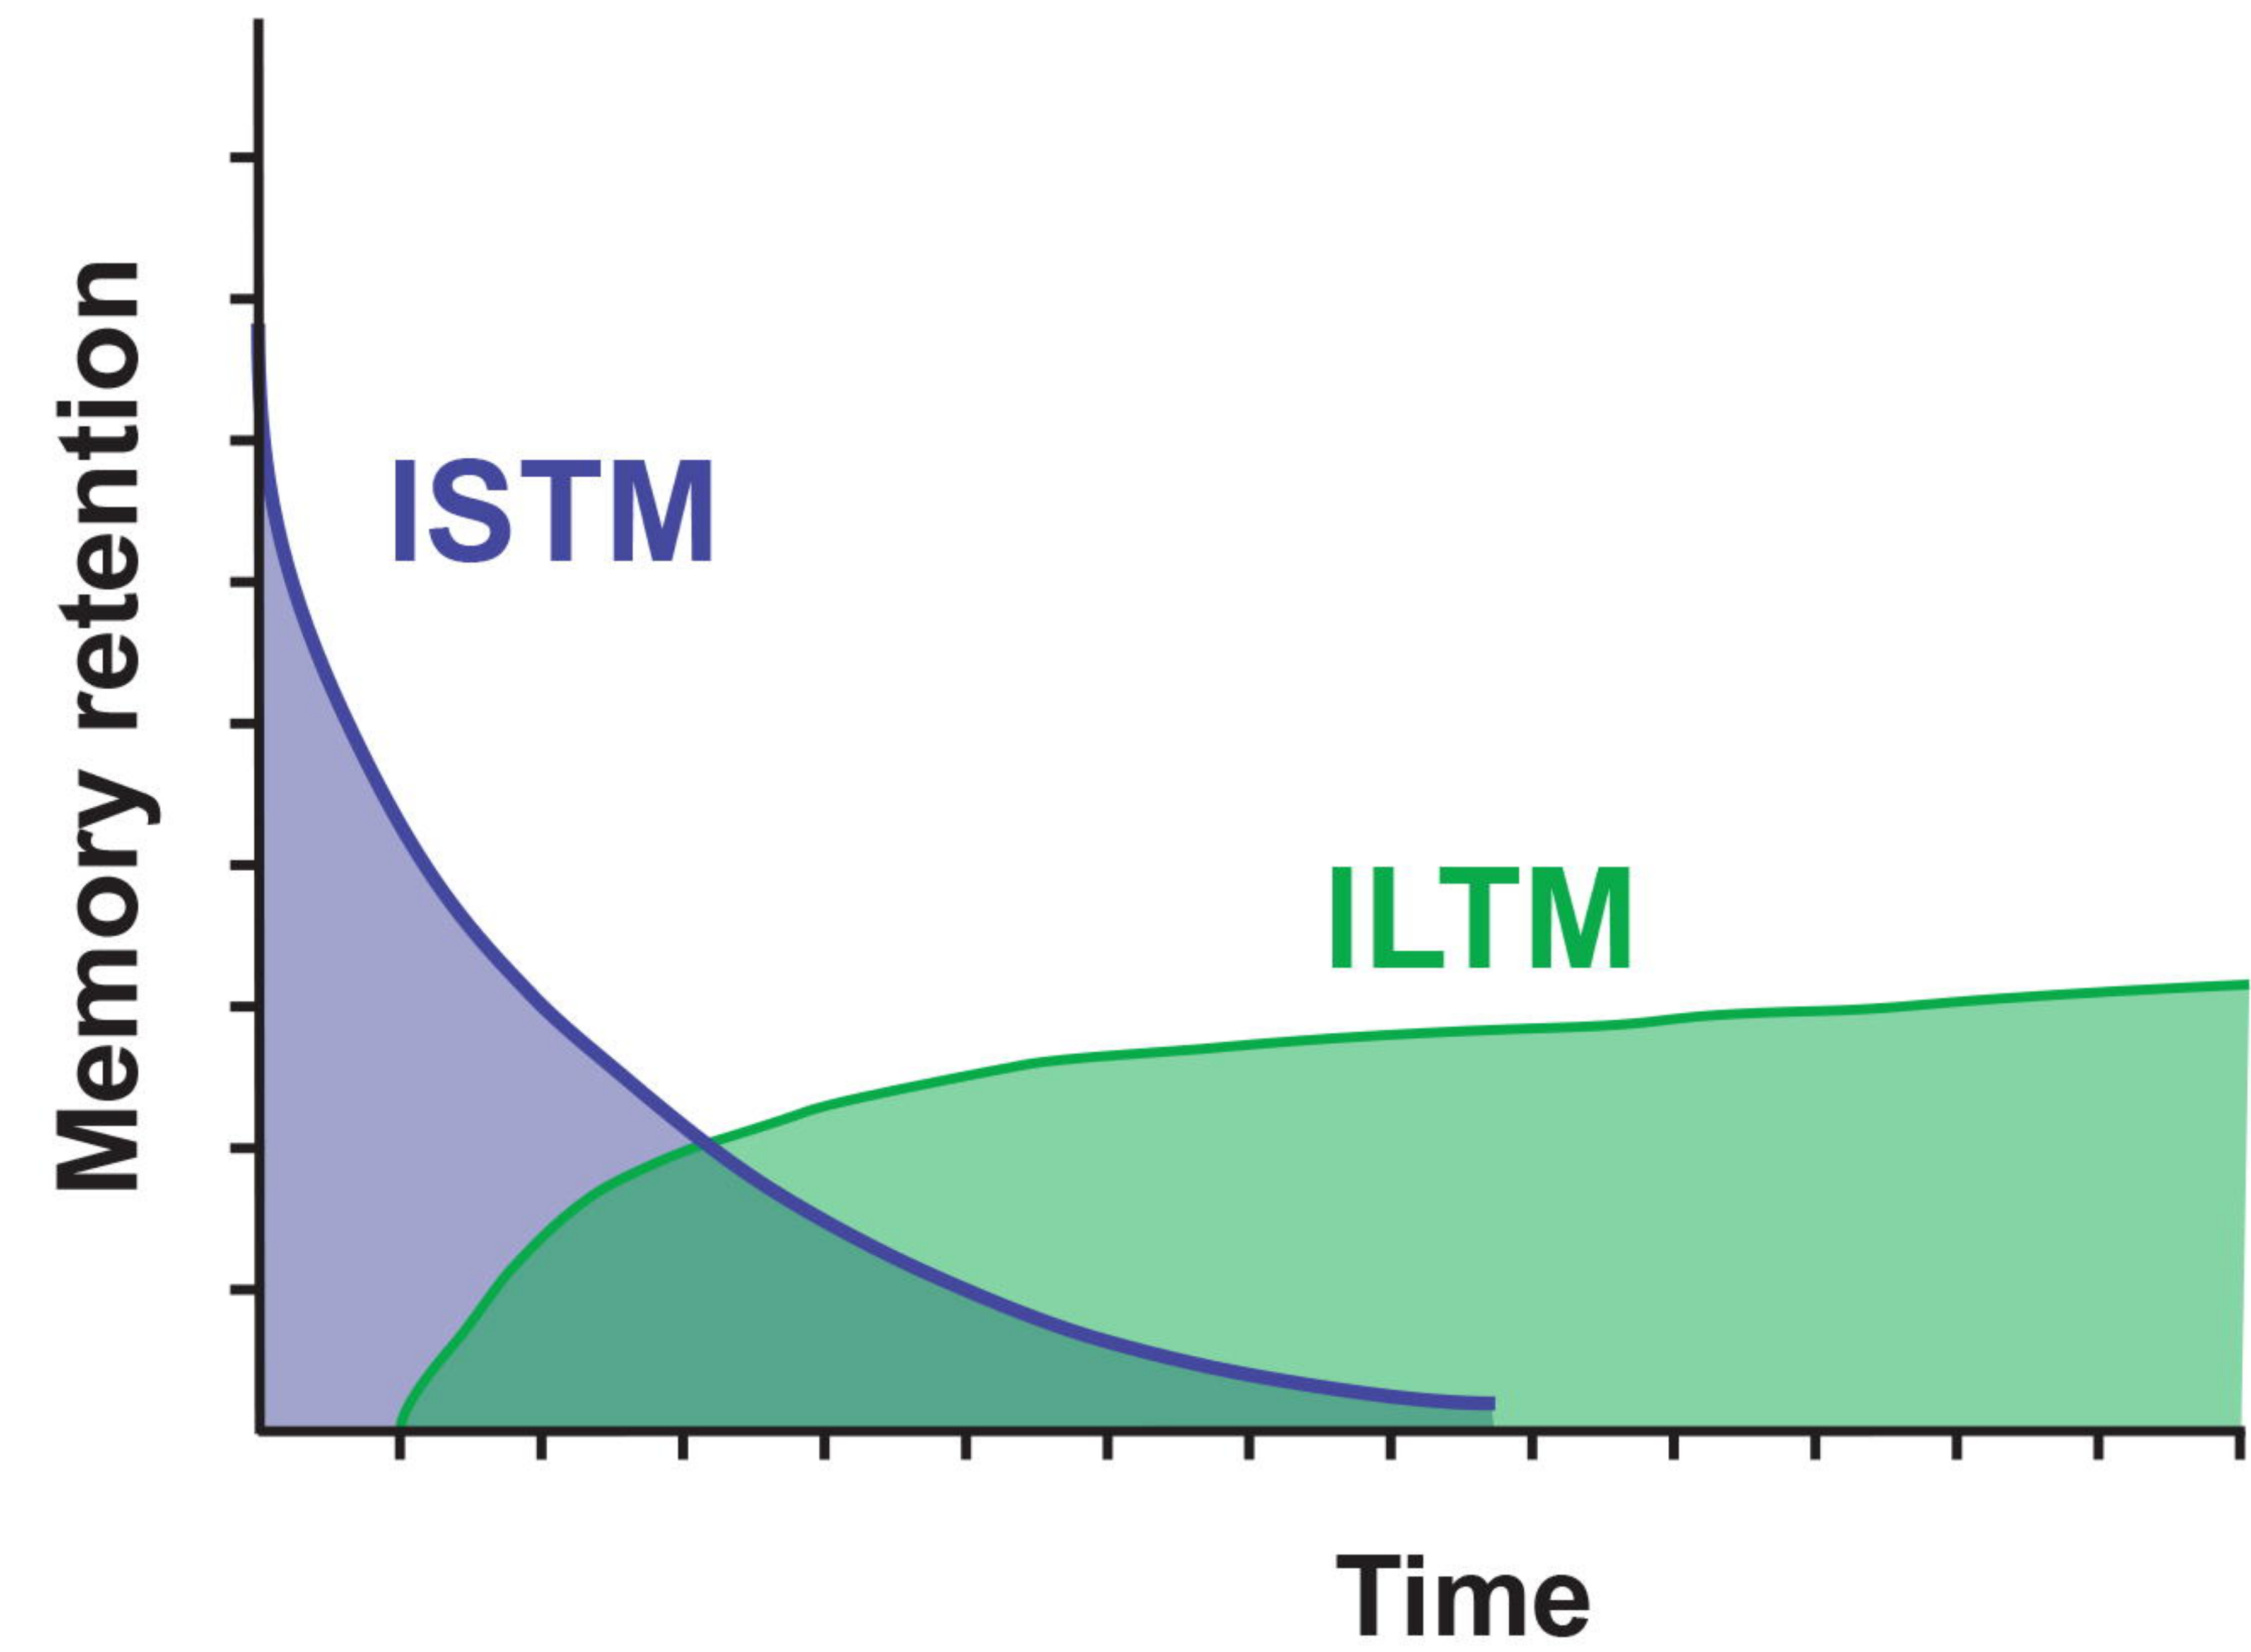

Source: https://www.biorxiv.org/content/biorxiv/early/2019/11/15/842997.full.pdf
